# Supplementary material for: Ferrocene/air double-mediated FeTiO3-photocatalyzed semi-heterogeneous annulation of quinoxalin-2(1H)-ones in EtOH/H2O
Source: Royal Society of Chemistry journal article supplement (doi:10.1039/d3cc04020h), 2023-01-01

**Ferrocene/Air Double-Mediated FeTiO<sub>3</sub>-Photocatalyzed  
Semi-heterogeneous Annulation of Quinoxalin-2(1*H*)-ones in  
EtOH/H<sub>2</sub>O**

Wen-Tao Ouyang<sup>a</sup>, Hong-Tao Ji<sup>a</sup>, Jun Jiang<sup>a</sup>, Chao Wu<sup>a</sup>, Jia-Chen Hou<sup>a</sup>,  
Min-Hang Zhou<sup>a</sup>, Yu-Han Lu<sup>a</sup>, Li-Juan Ou<sup>b\*</sup>, Wei-Min He<sup>a\*</sup>

School of Chemistry and Chemical Engineering, University of South China,  
Hengyang, 421001, China

Wei-Min He: [weiminhe@usc.edu.cn](mailto:weiminhe@usc.edu.cn)

[oulijuanann@163.com](mailto:oulijuanann@163.com)

**Table of Content**

|                                                                                                 |            |
|-------------------------------------------------------------------------------------------------|------------|
| <b>1. General Information.....</b>                                                              | <b>S2</b>  |
| <b>2. Experimental Section.....</b>                                                             | <b>S3</b>  |
| <b>2.1 General Procedure for Compounds 4aa .....</b>                                            | <b>S4</b>  |
| <b>2.2 Gram-scale synthesis of 4aa .....</b>                                                    | <b>S4</b>  |
| <b>2.3 Radical Trapped Experiments .....</b>                                                    | <b>S5</b>  |
| <b>2.4 Reusability and Stability of Photocatalyst .....</b>                                     | <b>S7</b>  |
| <b>2.5 Effect of Visible Light Irradiation .....</b>                                            | <b>S8</b>  |
| <b>2.6 Cyclic Voltammetry Experiments.....</b>                                                  | <b>S9</b>  |
| <b>2.7 Fe<sup>3+</sup> verification experiment .....</b>                                        | <b>S10</b> |
| <b>3. Characterization Data for Products.....</b>                                               | <b>S11</b> |
| <b>4. Reference.....</b>                                                                        | <b>S25</b> |
| <b>5. <sup>1</sup>H NMR, <sup>13</sup>C NMR and <sup>19</sup>F NMR Spectra of Products.....</b> | <b>S26</b> |

## 1. General Information

Unless otherwise specified, all reagents and solvents were obtained from commercial suppliers and used without further purification. <sup>1</sup>H NMR spectra were recorded at 500 MHz, <sup>13</sup>C NMR spectra were recorded at 126 MHz and <sup>19</sup>F NMR spectra were recorded at 471 MHz by using a Bruker Avance 500 spectrometer. Chemical shifts were calibrated using residual undeuterated solvent as an internal reference (<sup>1</sup>H NMR: CDCl<sub>3</sub> 7.26 ppm; dmsO-d<sub>6</sub> 2.50ppm, <sup>13</sup>C NMR: CDCl<sub>3</sub> 77.16 ppm; dmsO-d<sub>6</sub> 39.52ppm ), the chemical shifts ( $\delta$ ) were expressed in ppm and J values were given in Hz. The following abbreviations were used to describe peak splitting patterns when appropriate: s = singlet, d = doublet, t = triplet, q = quartet, m = multiplet, dd = doublet of doublets, br = broad. Mass spectra were performed on a spectrometer operating on ESI-TOF. Powder X-ray diffraction (PXRD) data were collected on a Rigaku Smartlab 9 kW X-ray diffractometer operating at 45 kV/200mA using the Cu K $\alpha$  line ( $\lambda = 1.5418 \text{ \AA}$ ). PXRD patterns were measured over the 2 $\theta$  range of 3-50 with 5 per min per step over 10 min. Column chromatography was performed on silica gel (200-300 mesh). The gram-scale synthesis crude products were purified by HPLC (LaboACE LC-5060, Japan Analytical Industry Co., Ltd., Japan) equipped with Jaigel 2.5 HR columns with dichloromethane as the eluent.

### **The Light Source and the Material of the Irradiation Vessel**

Manufacturer: Beijing Rogertech Ltd.

Model: OHSP-350 UV

Value: 2662.138  $\mu\text{W}/\text{cm}^2/\text{nm}$

Energy peak wavelength: 516.0 nm

Peak width at half-height: 22.1 nm

Material of the irradiation vessel: Schlenk flask

Not use any filters

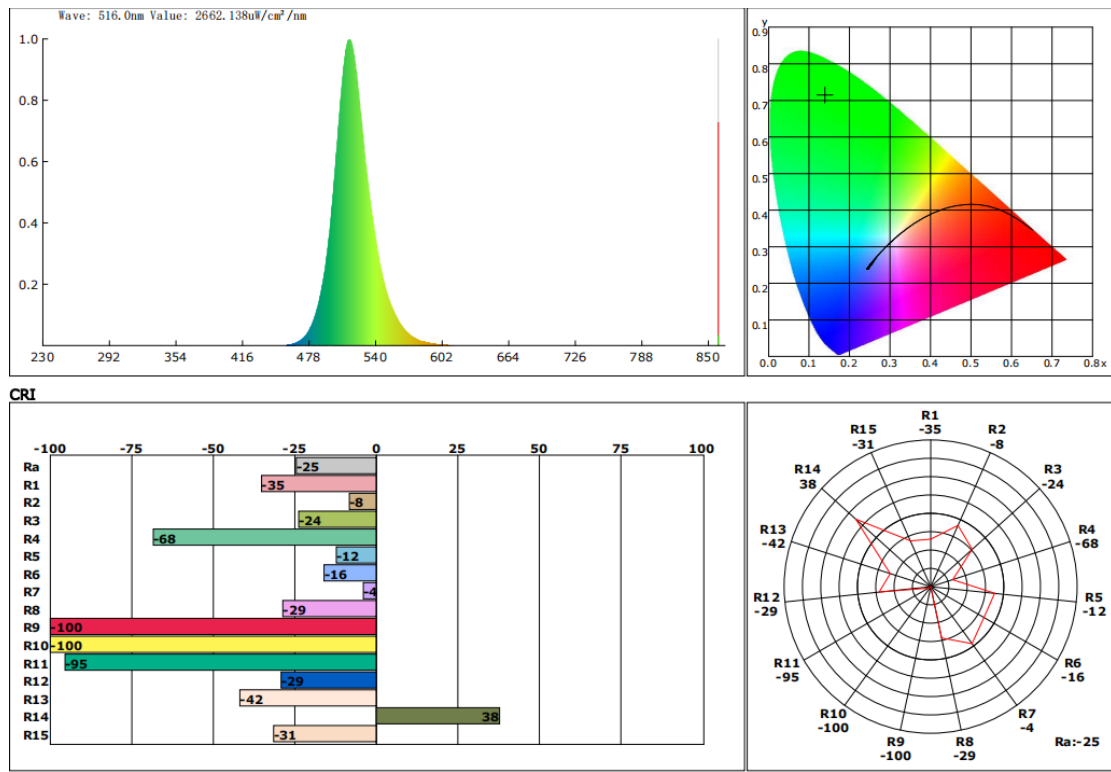

Figure S1: LED spectrum test report

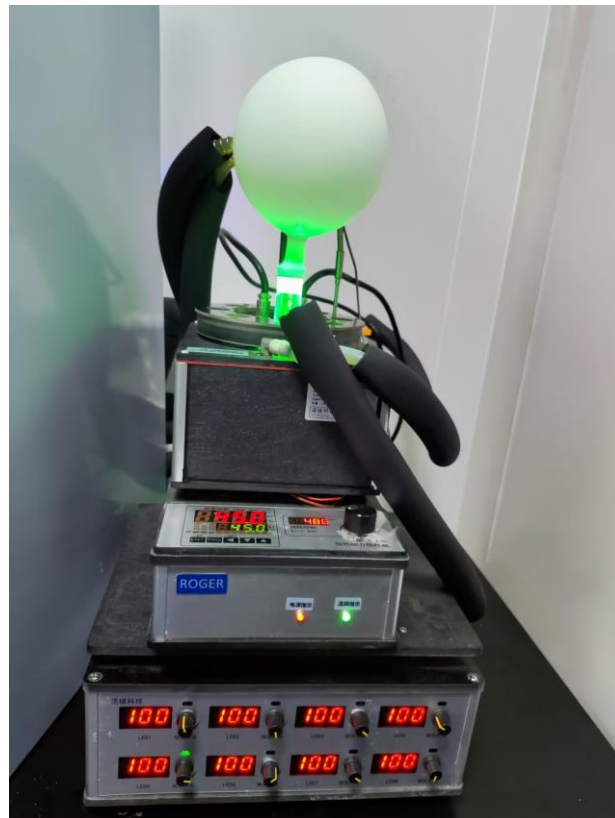

Figure S2 (Photographed by author Wen-Tao Ouyang)

## 2. Experimental Section

### 2.1 General Procedure for Compounds 4aa

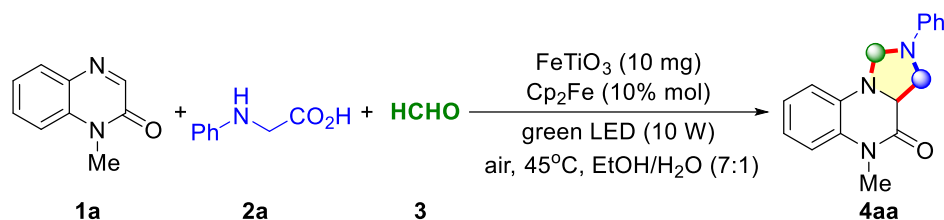

Scheme S1

To a solution of 1-methylquinoxalin-2(1*H*)-one **1a** (0.2 mmol) in EtOH (3.15 mL) and H<sub>2</sub>O (0.45 mL) was added *N*-phenylglycine **2a** (0.24 mmol), formaldehyde **3** (0.24 mmol), FeTiO<sub>3</sub> (10 mg) and Cp<sub>2</sub>Fe (0.02 mmol). The reaction mixture was equipped with an air balloon and stirred at 45 °C under the irradiation of green LED (10 W) for 2 h. After completion, the solvent was concentrated under reduced pressure, and the pure products **4aa** was obtained by flash chromatography on silica gel.

### 2.2 Gram-scale synthesis of 4aa

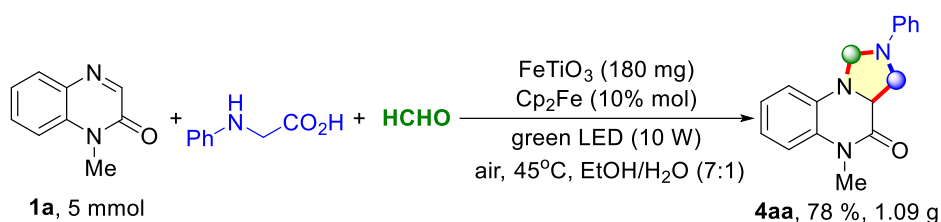

Scheme S2

To a solution of 1-methylquinoxalin-2(1*H*)-one **1a** (5 mmol) in EtOH (21 mL) and H<sub>2</sub>O (3 mL) was added *N*-phenylglycine **2a** (6 mmol), formaldehyde **3** (6 mmol), FeTiO<sub>3</sub> (180 mg) and Cp<sub>2</sub>Fe (0.5 mmol). The reaction mixture was equipped with an air balloon and stirred at 45 °C under the irradiation of green LED (10 W). After completion of the reaction, the resulting mixture was filtrated and the organic phase was removed under vacuum. The residue was purified by HPLC to give 1.09 gram of **4aa**, 78% yield.

## 2.3 Radical Trapped Experiments

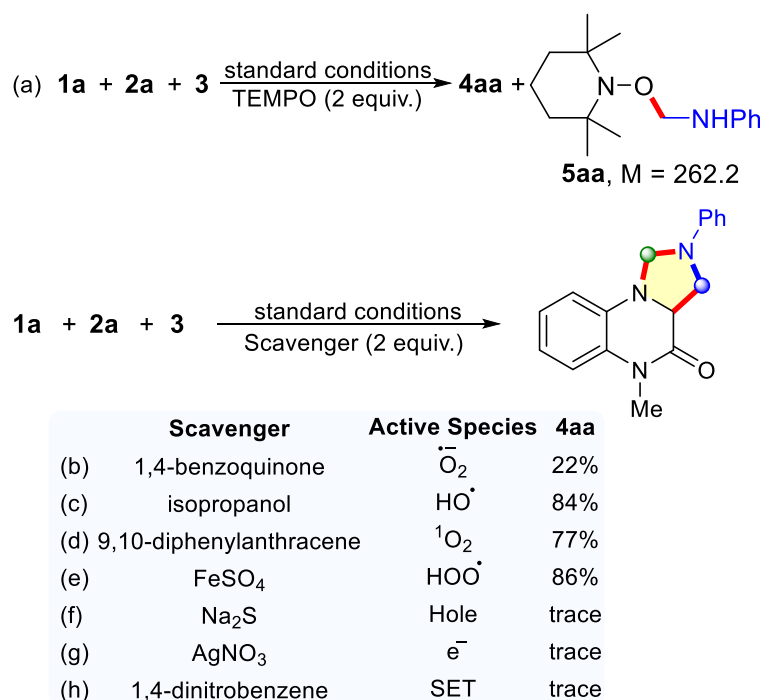

**Scheme S3**

(a) To a solution of 1-methylquinoxalin-2(1*H*)-one **1a** (0.2 mmol) in EtOH (3.15 mL) and H<sub>2</sub>O (0.45 mL) was added *N*-phenylglycine **2a** (0.24 mmol), formaldehyde **3** (0.24 mmol), FeTiO<sub>3</sub> (10 mg), Cp<sub>2</sub>Fe (0.02 mmol) and TEMPO (0.4 mmol). The reaction mixture was equipped with an air balloon and stirred at 45 °C under the irradiation of green LED (10 W) for about 2 h. The reaction mixture was analyzed by GC and a trace amount of **4aa** was detected.

(b) To a solution of 1-methylquinoxalin-2(1*H*)-one **1a** (0.2 mmol) in EtOH (3.15 mL) and H<sub>2</sub>O (0.45 mL) was added *N*-phenylglycine **2a** (0.24 mmol), formaldehyde **3** (0.24 mmol), FeTiO<sub>3</sub> (10 mg), Cp<sub>2</sub>Fe (0.02 mmol) and 1,4-benzoquinone (0.4 mmol). The reaction mixture was equipped with an air balloon and stirred at 45 °C under the irradiation of green LED (10 W) for about 2 h. The reaction mixture was analyzed by GC and a 22% yield of **4aa** was detected.

(c) To a solution of 1-methylquinoxalin-2(1*H*)-one **1a** (0.2 mmol) in EtOH (3.15 mL) and H<sub>2</sub>O (0.45 mL) was added *N*-phenylglycine **2a** (0.24 mmol), formaldehyde **3** (0.24 mmol), FeTiO<sub>3</sub> (10 mg), Cp<sub>2</sub>Fe (0.02 mmol) and isopropanol (0.4 mmol). The reaction mixture was equipped with an air balloon and stirred at 45 °C under the

irradiation of green LED (10 W) for about 2 h. The reaction mixture was analyzed by GC and an 84% yield amount of **4aa** was detected.

(d) To a solution of 1-methylquinoxalin-2(1*H*)-one **1a** (0.2 mmol) in EtOH (3.15 mL) and H<sub>2</sub>O (0.45 mL) was added *N*-phenylglycine **2a** (0.24 mmol), formaldehyde **3** (0.24 mmol), FeTiO<sub>3</sub> (10 mg), Cp<sub>2</sub>Fe (0.02 mmol) and 9,10-diphenylanthracene (0.4 mmol). The reaction mixture was equipped with an air balloon and stirred at 45 °C under the irradiation of green LED (10 W) for about 2 h. The reaction mixture was analyzed by GC and an 77% yield of **4aa** was detected.

(e) To a solution of 1-methylquinoxalin-2(1*H*)-one **1a** (0.2 mmol) in EtOH (3.15 mL) and H<sub>2</sub>O (0.45 mL) was added *N*-phenylglycine **2a** (0.24 mmol), formaldehyde **3** (0.24 mmol), FeTiO<sub>3</sub> (10 mg), Cp<sub>2</sub>Fe (0.02 mmol) and FeSO<sub>4</sub> (0.4 mmol). The reaction mixture was equipped with an air balloon and stirred at 45 °C under the irradiation of green LED (10 W) for about 2 h. The reaction mixture was analyzed by GC and an 86% yield of **4aa** was detected.

(f) To a solution of 1-methylquinoxalin-2(1*H*)-one **1a** (0.2 mmol) in EtOH (3.15 mL) and H<sub>2</sub>O (0.45 mL) was added *N*-phenylglycine **2a** (0.24 mmol), formaldehyde **3** (0.24 mmol), FeTiO<sub>3</sub> (10 mg), Cp<sub>2</sub>Fe (0.02 mmol) and Na<sub>2</sub>S (0.4 mmol). The reaction mixture was equipped with an air balloon and stirred at 45 °C under the irradiation of green LED (10 W) for about 2 h. The reaction mixture was analyzed by GC and a trace amount of **4aa** was detected.

(g) To a solution of 1-methylquinoxalin-2(1*H*)-one **1a** (0.2 mmol) in EtOH (3.15 mL) and H<sub>2</sub>O (0.45 mL) was added *N*-phenylglycine **2a** (0.24 mmol), formaldehyde **3** (0.24 mmol), FeTiO<sub>3</sub> (10 mg), Cp<sub>2</sub>Fe (0.02 mmol) and AgNO<sub>3</sub> (0.4 mmol). The reaction mixture was equipped with an air balloon and stirred at 45 °C under the irradiation of green LED (10 W) for about 2 h. The reaction mixture was analyzed by GC and a trace amount of **4aa** was detected.

(h) To a solution of 1-methylquinoxalin-2(1*H*)-one **1a** (0.2 mmol) in EtOH (3.15 mL) and H<sub>2</sub>O (0.45 mL) was added *N*-phenylglycine **2a** (0.24 mmol), formaldehyde **3** (0.24 mmol), FeTiO<sub>3</sub> (10 mg), Cp<sub>2</sub>Fe (0.02 mmol) and 1,4-dinitrobenzene (0.4 mmol). The reaction mixture was equipped with an air balloon and stirred at 45 °C under the

irradiation of green LED (10 W) for about 2 h. The reaction mixture was analyzed by GC and a trace amount of **4aa** was detected.

#### 2.4 Reusability and Stability of Photocatalyst

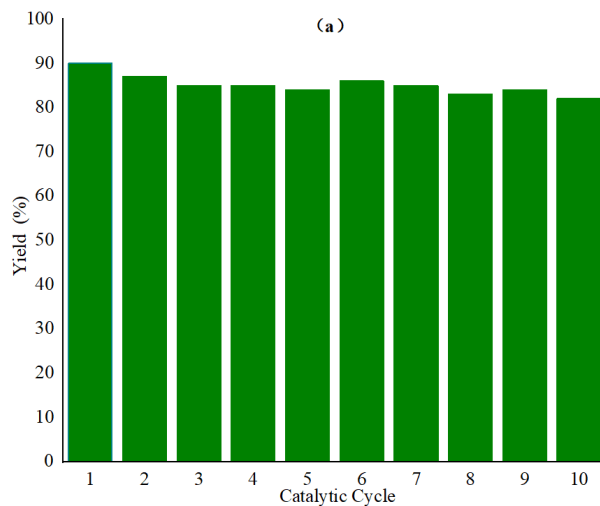

**Figure S3** Reusability and Stability of Photocatalyst

To a solution of 1-methylquinoxalin-2(1*H*)-one **1a** (0.2 mmol) in EtOH (3.15 mL) and H<sub>2</sub>O (0.45 mL) was added *N*-phenylglycine **2a** (0.24 mmol), formaldehyde **3** (0.24 mmol), FeTiO<sub>3</sub> (10mg), Cp<sub>2</sub>Fe (0.02 mmol). The reaction mixture was equipped with an air balloon and stirred at 45 °C under the irradiation of green LED (10 W) for about 2 h. After completion of the reaction, the photocatalyst was separated by centrifugation, washed twice with EtOH and used for next run. The reaction mixture was analysed by GC to give the yield of **4aa**.

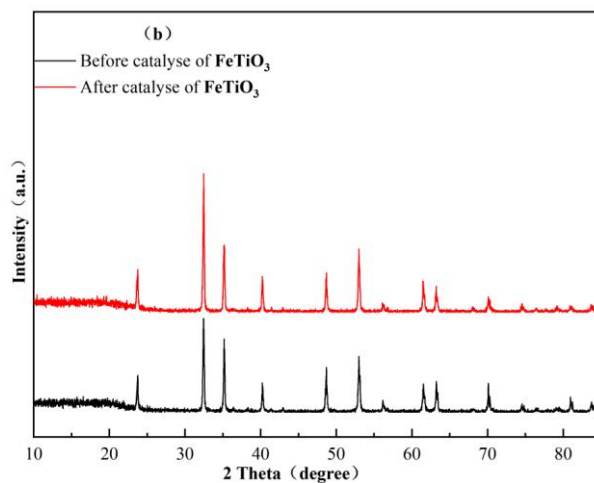

**Figure S4** XRD patterns of fresh FeTiO<sub>3</sub> and recycled FeTiO<sub>3</sub>.

## 2.5 Effect of Visible Light Irradiation

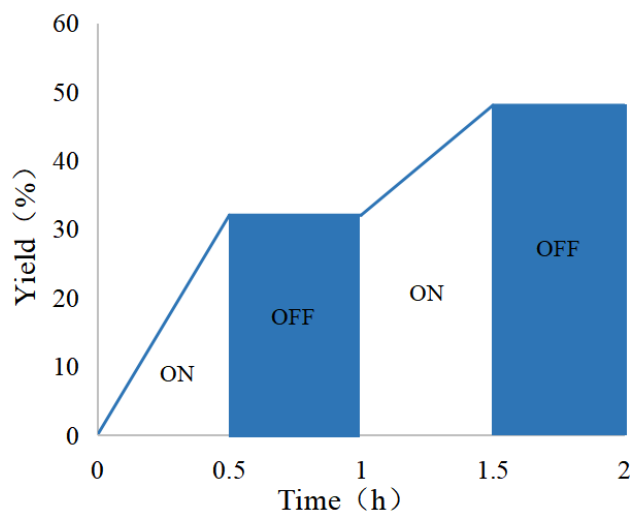

**Figure S5** Effect of Visible Light Irradiation

The model reaction was conducted under the standard conditions on a 0.2 mmol scale. The mixture was subjected to sequential periods of stirring under green LED (10 W) irradiation followed by stirring in the absence of light. At each time point, one reaction system was suspended and the yield was detected by GC.

## 2.6 Cyclic Voltammetry Experiments

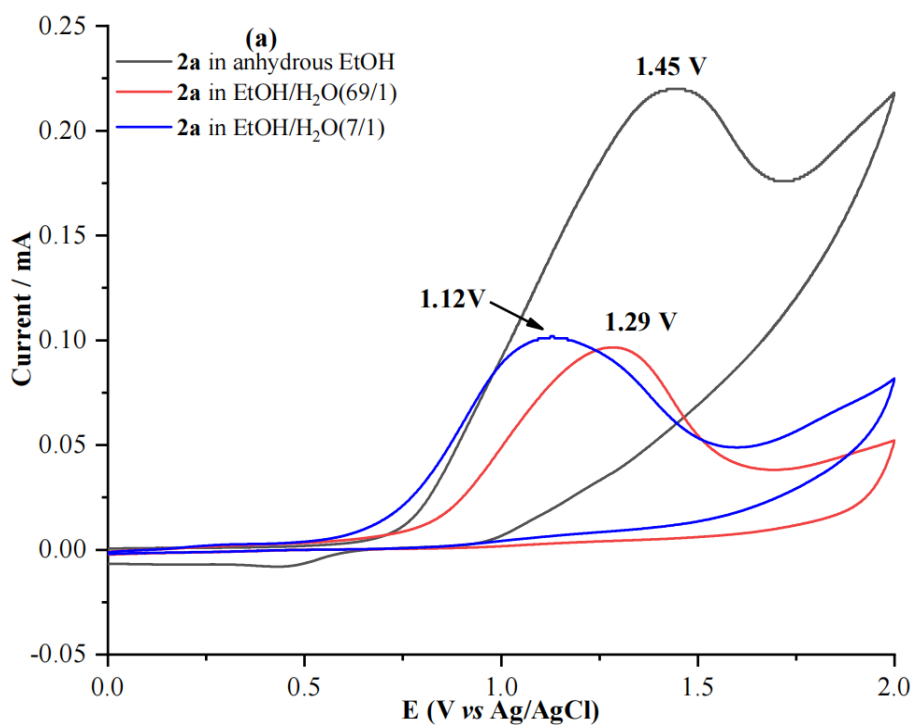



**Figure S6.** Cyclic voltammogram experiments of  ${}^n\text{Bu}_4\text{BF}_4\text{N}$  (0.1 M) as electrolyte in anhydrous EtOH or EtOH/ $\text{H}_2\text{O}$  from 0 V to +2.0 V at room temperature

The CV measurements were performed on a CHI 660E potentiostat, and the conditions are as follow: a glassy carbon disk working electrode (diameter, 3 mm), Pt disk and Ag/AgCl as counter and reference electrode. As shown in the Figure S4,  ${}^n\text{Bu}_4\text{BF}_4\text{N}$  (0.1 M) as electrolyte in 10 mL anhydrous EtOH or EtOH/ $\text{H}_2\text{O}$ . And cyclic voltammograms of reactants and their mixtures in 0.1 M  ${}^n\text{Bu}_4\text{BF}_4\text{N}$  glassy carbon disk working electrode (diameter, 3 mm), Pt disk and Ag/AgCl (0.1 M in anhydrous EtOH or EtOH/ $\text{H}_2\text{O}$ ) as counter and reference electrode at 100 mV/s scan rate: (1) 10 mM **2a** in anhydrous EtOH (10 mL) (black line), (2) 10 mM **2a** in EtOH/ $\text{H}_2\text{O}$  (69/1) (10 mL) (red line), (3) 10 mM **2a** in EtOH/ $\text{H}_2\text{O}$  (7/1) (10 mL) (blue line)

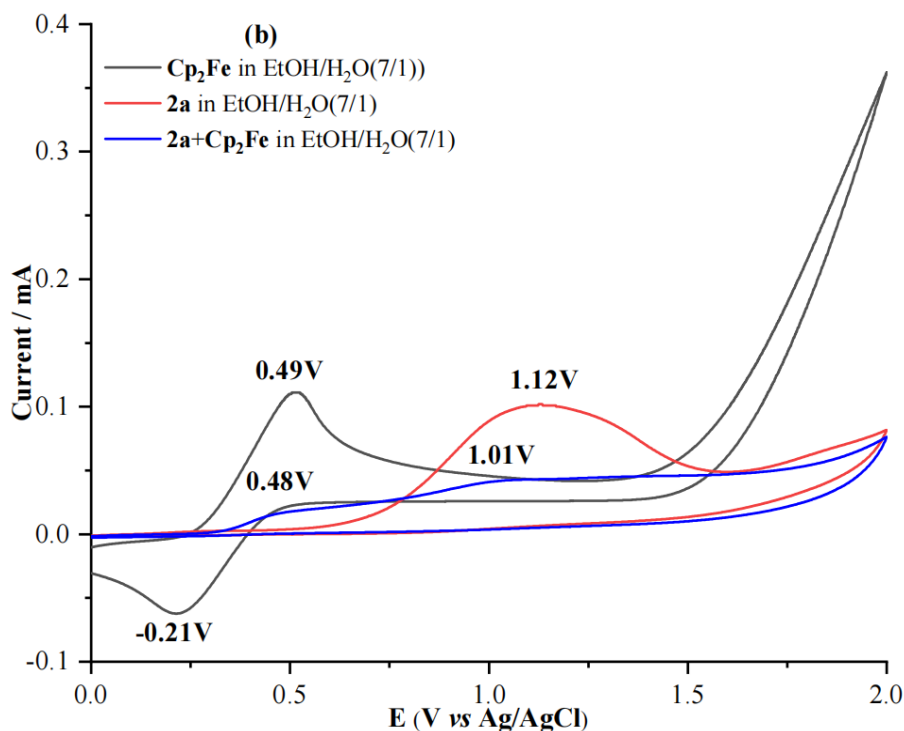

**Figure S7** Cyclic voltammogram experiments of  ${}^n\text{Bu}_4\text{BF}_4\text{N}$  (0.1 M) as electrolyte in EtOH/ $\text{H}_2\text{O}$  (7/1) from 0 V to +2.0 V at room temperature

As shown in the Figure S7,  ${}^n\text{Bu}_4\text{BF}_4\text{N}$  (0.1 M) as electrolyte in 10 mL anhydrous EtOH/ $\text{H}_2\text{O}$  (7/1). And cyclic voltammograms of reactants and their mixtures in glassy carbon disk working electrode (diameter, 3 mm), Pt disk and Ag/AgCl (0.1 M in EtOH/ $\text{H}_2\text{O}$  (7/1)) as counter and reference electrode at 100 mV/s scan rate: (1) 10 mM

Cp<sub>2</sub>Fe in EtOH/H<sub>2</sub>O (7/1) (black line), (2) 10 mM **2a** in EtOH/H<sub>2</sub>O (7/1) (red line), (3) 10 mM **2a** and Cp<sub>2</sub>Fe in EtOH/H<sub>2</sub>O (7/1) (blue line)。

### 2.7 Fe<sup>3+</sup> verification experiment

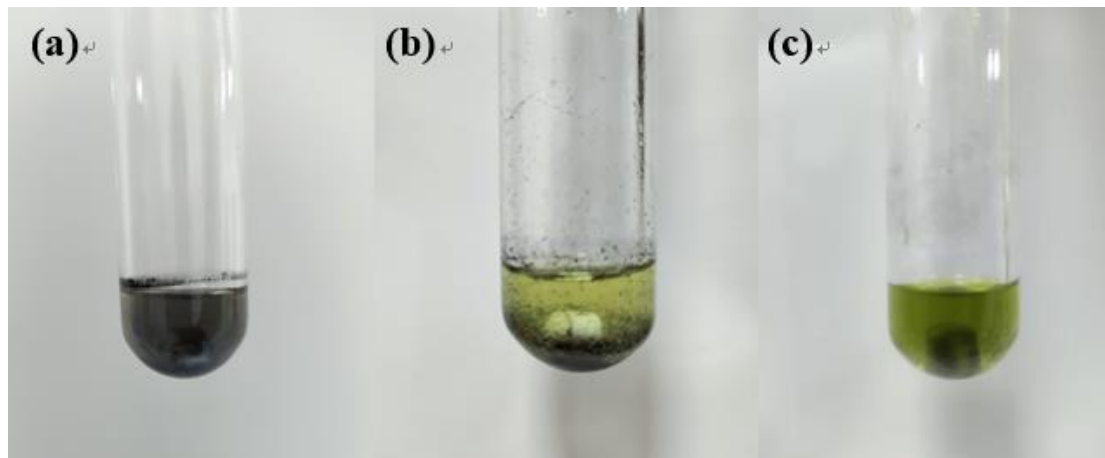

**Figure S8** Fe<sup>3+</sup> verification experiment

As shown in the Figure S8 (a) K<sub>4</sub>Fe(CN)<sub>6</sub> (0.1 mmol), **1a** (0.1 mmol), FeTiO<sub>3</sub> (20 mg) in 2 mL EtOH/H<sub>2</sub>O (1/1). (b) K<sub>4</sub>Fe(CN)<sub>6</sub> (0.1 mmol), **1a** (0.1 mmol), FeTiO<sub>3</sub> (20 mg) in 2 mL EtOH/H<sub>2</sub>O (1/1), The reaction mixture was equip with an air balloon and stirred at 45 °C under the irradiation of green LED (10 W) for about 60 min. (c) K<sub>3</sub>Fe(CN)<sub>6</sub> (0.05 mmol), **1a** (0.05 mmol), FeTiO<sub>3</sub> (10 mg) in 2 mL EtOH/H<sub>2</sub>O (1/1).

### 3. Characterization Data for Products

#### 5-methyl-2-phenyl-1,2,3,3a-tetrahydroimidazo[1,5-a]quinoxalin-4(5H)-one (**4aa**)<sup>1</sup>

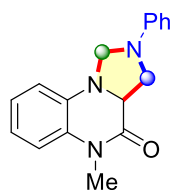

<sup>1</sup>H NMR (500 MHz, CDCl<sub>3</sub>) δ 7.26 (t, *J* = 7.7 Hz, 2H), 7.03 (t, *J* = 7.5 Hz, 1H), 6.97 (d, *J* = 7.8 Hz, 1H), 6.92 (t, *J* = 7.6 Hz, 1H), 6.77 (t, *J* = 7.2 Hz, 1H), 6.58 (t, *J* = 7.5 Hz, 3H), 4.67 (d, *J* = 3.0 Hz, 1H), 4.56 (d, *J* = 2.9 Hz, 1H), 3.99 – 3.92 (m, 1H), 3.84 (t, *J* = 7.6 Hz, 1H), 3.68 (t, *J* = 8.8 Hz, 1H), 3.35 (s, 3H).

<sup>13</sup>C NMR (126 MHz, CDCl<sub>3</sub>) δ 165.4, 145.7, 134.2, 130.3, 129.4, 124.0, 120.1, 117.4, 115.1, 112.0, 111.7, 64.6, 58.7, 48.5, 29.0.

**5-ethyl-2-phenyl-1,2,3,3a-tetrahydroimidazo[1,5-a]quinoxalin-4(5H)-one(4ba)<sup>1</sup>**

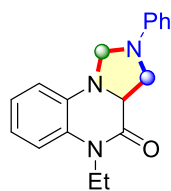

<sup>1</sup>H NMR (500 MHz, CDCl<sub>3</sub>)  $\delta$  7.31 (t,  $J$  = 7.8 Hz, 2H), 7.11 – 7.05 (m, 2H), 6.97 (t,  $J$  = 7.7 Hz, 1H), 6.81 (t,  $J$  = 7.3 Hz, 1H), 6.69 – 6.63 (m, 3H), 4.77 (d,  $J$  = 3.2 Hz, 1H), 4.64 (d,  $J$  = 3.2 Hz, 1H), 4.17 – 4.09 (m, 1H), 4.04 – 3.96 (m, 2H), 3.91 (t,  $J$  = 7.6 Hz, 1H), 3.78 (t,  $J$  = 8.8 Hz, 1H), 1.31 (t,  $J$  = 7.2 Hz, 3H).

<sup>13</sup>C NMR (126 MHz, CDCl<sub>3</sub>)  $\delta$  165.0, 145.8, 134.6, 129.5, 129.2, 124.0, 120.3, 117.5, 115.0, 112.4, 111.8, 64.7, 58.8, 48.5, 37.2, 12.8.

**5-cyclohexyl-2-phenyl-1,2,3,3a-tetrahydroimidazo[1,5-a]quinoxalin-4(5H)-one**

**(4ca)**

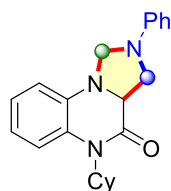

<sup>1</sup>H NMR (500 MHz, CDCl<sub>3</sub>)  $\delta$  7.31 (t,  $J$  = 7.4 Hz, 2H), 7.11 – 7.04 (m, 2H), 6.96 (t,  $J$  = 7.7 Hz, 1H), 6.80 (d,  $J$  = 7.2 Hz, 1H), 6.69 – 6.63 (m, 3H), 4.79 (d,  $J$  = 2.5 Hz, 1H), 4.67 – 4.61 (m, 1H), 4.07 – 3.99 (m, 2H), 3.91 (t,  $J$  = 7.6 Hz, 1H), 3.80 (d,  $J$  = 8.8 Hz, 1H), 1.81 – 1.67 (m, 5H), 1.21 – 1.07 (m, 5H).

<sup>13</sup>C NMR (126 MHz, CDCl<sub>3</sub>)  $\delta$  165.7, 145.9, 134.8, 129.6, 129.6, 123.9, 120.2, 117.5, 115.7, 112.5, 111.8, 64.8, 58.8, 48.7, 47.4, 35.9, 31.1, 30.6, 26.4, 26.0.

HRMS (ESI)  $m/z$  calcd for C<sub>22</sub>H<sub>26</sub>N<sub>3</sub>O [M+H]<sup>+</sup> : 348.2070, found 348.2068

**5-benzyl-2-phenyl-1,2,3,3a-tetrahydroimidazo[1,5-a]quinoxalin-4(5H)-one(4da)<sup>1</sup>**

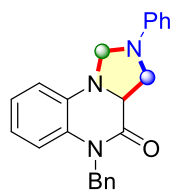

$^1\text{H}$  NMR (500 MHz,  $\text{CDCl}_3$ )  $\delta$  7.35 – 7.29 (m, 4H), 7.27 – 7.22 (m, 3H), 7.03 (t,  $J$  = 7.6 Hz, 1H), 6.93 (d,  $J$  = 8.0 Hz, 1H), 6.84 – 6.78 (m, 2H), 6.65 (d,  $J$  = 7.7 Hz, 3H), 5.44 (d,  $J$  = 16.2 Hz, 1H), 4.97 (d,  $J$  = 16.2 Hz, 1H), 4.80 (d,  $J$  = 3.2 Hz, 1H), 4.67 (d,  $J$  = 3.1 Hz, 1H), 4.19 – 4.13 (m, 1H), 3.96 (t,  $J$  = 7.7 Hz, 1H), 3.84 (t,  $J$  = 8.9 Hz, 1H).  
 $^{13}\text{C}$  NMR (126 MHz,  $\text{CDCl}_3$ )  $\delta$  165.8, 145.8, 136.5, 134.6, 129.7, 129.6, 128.9, 127.4, 126.6, 124.2, 120.4, 117.6, 116.1, 112.3, 111.8, 64.8, 59.0, 48.6, 45.9.

**5-(4-methylbenzyl)-2-phenyl-1,2,3,3a-tetrahydroimidazo[1,5-a]quinoxalin-4(5H)-one(4ea)<sup>1</sup>**

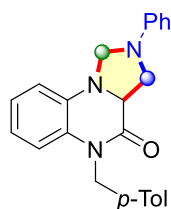

$^1\text{H}$  NMR (500 MHz,  $\text{CDCl}_3$ )  $\delta$  7.34 (t,  $J$  = 7.6 Hz, 2H), 7.21 – 7.13 (m, 4H), 7.06 (t,  $J$  = 7.6 Hz, 1H), 6.98 (d,  $J$  = 8.0 Hz, 1H), 6.88 – 6.82 (m, 2H), 6.68 (d,  $J$  = 7.9 Hz, 3H), 5.43 (d,  $J$  = 16.1 Hz, 1H), 4.96 (d,  $J$  = 16.0 Hz, 1H), 4.81 (d,  $J$  = 3.0 Hz, 1H), 4.68 (d,  $J$  = 2.9 Hz, 1H), 4.20 – 4.14 (m, 1H), 3.98 (t,  $J$  = 7.6 Hz, 1H), 3.87 (t,  $J$  = 8.8 Hz, 1H), 2.34 (s, 3H).

$^{13}\text{C}$  NMR (126 MHz,  $\text{CDCl}_3$ )  $\delta$  165.7, 145.8, 137.0, 134.5, 133.4, 129.7, 129.6, 129.6, 126.5, 124.2, 120.3, 117.6, 116.1, 112.3, 111.8, 64.8, 58.9, 48.5, 45.6, 21.2.

**5-(4-methoxybenzyl)-2-phenyl-1,2,3,3a-tetrahydroimidazo[1,5-a]quinoxalin-4(5H)-one(4fa)<sup>2</sup>**

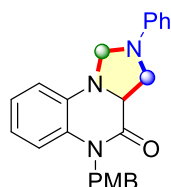

$^1\text{H}$  NMR (500 MHz,  $\text{CDCl}_3$ )  $\delta$  7.32 (t,  $J$  = 7.8 Hz, 2H), 7.20 (d,  $J$  = 8.5 Hz, 2H), 7.05 (t,  $J$  = 7.6 Hz, 1H), 6.99 (d,  $J$  = 8.0 Hz, 1H), 6.89 – 6.80 (m, 4H), 6.67 (d,  $J$  = 8.0 Hz, 3H), 5.36 (d,  $J$  = 15.9 Hz, 1H), 4.97 (d,  $J$  = 15.9 Hz, 1H), 4.81 (d,  $J$  = 3.2 Hz, 1H),

4.68 (d,  $J = 3.2$  Hz, 1H), 4.18 – 4.13 (m, 1H), 4.00 – 3.94 (m, 1H), 3.86 (t,  $J = 8.9$  Hz, 1H), 3.78 (s, 3H).

$^{13}\text{C}$  NMR (126 MHz,  $\text{CDCl}_3$ )  $\delta$  165.8, 158.9, 145.8, 134.6, 129.7, 129.6, 128.5, 128.0, 124.2, 120.3, 117.6, 116.1, 114.3, 112.3, 111.8, 64.8, 59.0, 55.4, 48.6, 45.3.

**5-allyl-2-phenyl-1,2,3,3a-tetrahydroimidazo[1,5-a]quinoxalin-4(5H)-one(4ga)<sup>1</sup>**

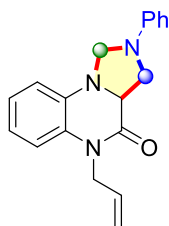

$^1\text{H}$  NMR (500 MHz,  $\text{CDCl}_3$ )  $\delta$  7.32 (t,  $J = 7.7$  Hz, 2H), 7.12 – 7.03 (m, 2H), 6.94 (t,  $J = 7.7$  Hz, 1H), 6.82 (t,  $J = 7.3$  Hz, 1H), 6.70 – 6.62 (m, 3H), 5.97 – 5.88 (m, 1H), 5.28 – 5.21 (m, 2H), 4.89 – 4.82 (m, 1H), 4.78 (d,  $J = 3.2$  Hz, 1H), 4.66 (d,  $J = 3.2$  Hz, 1H), 4.43 – 4.35 (m, 1H), 4.10 – 4.04 (m, 1H), 3.92 (t,  $J = 7.6$  Hz, 1H), 3.80 (t,  $J = 8.8$  Hz, 1H).

$^{13}\text{C}$  NMR (126 MHz,  $\text{CDCl}_3$ )  $\delta$  165.3, 145.8, 134.5, 132.1, 129.7, 129.5, 124.2, 120.3, 117.5, 117.0, 115.8, 112.3, 111.8, 64.7, 58.8, 48.4, 44.7.

**2-phenyl-5-(prop-2-yn-1-yl)-1,2,3,3a-tetrahydroimidazo[1,5-a]quinoxalin-4(5H)-one (4ha)<sup>1</sup>**

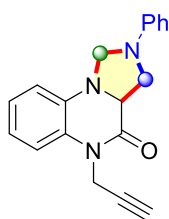

$^1\text{H}$  NMR (500 MHz,  $\text{CDCl}_3$ )  $\delta$  7.33 – 7.24 (m, 3H), 7.11 (t,  $J = 7.5$  Hz, 1H), 7.00 (t,  $J = 7.6$  Hz, 1H), 6.81 (t,  $J = 7.2$  Hz, 1H), 6.68 (d,  $J = 7.7$  Hz, 1H), 6.63 (d,  $J = 7.7$  Hz, 2H), 5.02 (d,  $J = 17.6$  Hz, 1H), 4.76 (s, 1H), 4.66 (s, 1H), 4.46 (d,  $J = 17.6$  Hz, 1H), 4.06 (t,  $J = 7.8$  Hz, 1H), 3.92 (t,  $J = 7.5$  Hz, 1H), 3.77 (t,  $J = 8.8$  Hz, 1H), 2.27 (s, 1H).

$^{13}\text{C}$  NMR (126 MHz,  $\text{CDCl}_3$ )  $\delta$  165.1, 145.7, 134.4, 129.6, 128.9, 124.6, 120.4, 117.7, 115.7, 112.4, 111.8, 78.2, 72.4, 64.7, 58.9, 48.4, 31.7.

**2-(4-oxo-2-phenyl-2,3,3a,4-tetrahydroimidazo[1,5-a]quinoxalin-5(1H)-yl)acetonitrile (4ia)<sup>1</sup>**

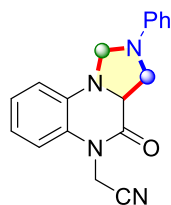

<sup>1</sup>H NMR (500 MHz, DMSO-*d*<sub>6</sub>)  $\delta$  7.30 (d, *J* = 7.4 Hz, 1H), 7.24 (s, 2H), 7.15 (s, 1H), 7.03 (d, *J* = 6.9 Hz, 1H), 6.92 (d, *J* = 7.0 Hz, 1H), 6.77 – 6.66 (m, 3H), 5.23 – 5.10 (m, 2H), 4.82 (s, 1H), 4.54 (s, 1H), 4.29 – 4.18 (m, 1H), 3.84 (s, 1H), 3.59 (t, *J* = 8.1 Hz, 1H).

<sup>13</sup>C NMR (126 MHz, DMSO-*d*<sub>6</sub>)  $\delta$  165.2, 145.7, 134.5, 129.2, 127.7, 124.7, 120.1, 116.9, 116.3, 115.2, 113.2, 111.9, 64.5, 58.0, 47.7, 29.8.

**Ethyl-2-(4-oxo-2-phenyl-2,3,3a,4-tetrahydroimidazo[1,5-a]quinoxalin-5(1H)-yl)acetate(4ja)<sup>1</sup>**

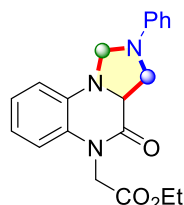

<sup>1</sup>H NMR (500 MHz, CDCl<sub>3</sub>)  $\delta$  7.31 (t, *J* = 7.8 Hz, 2H), 7.10 (t, *J* = 7.6 Hz, 1H), 6.94 (t, *J* = 7.6 Hz, 1H), 6.81 (t, *J* = 8.7 Hz, 2H), 6.69 (d, *J* = 7.8 Hz, 1H), 6.64 (d, *J* = 8.1 Hz, 2H), 5.04 (d, *J* = 17.6 Hz, 1H), 4.78 (d, *J* = 3.2 Hz, 1H), 4.66 (d, *J* = 3.1 Hz, 1H), 4.38 (d, *J* = 17.6 Hz, 1H), 4.29 – 4.24 (m, 2H), 4.14 – 4.09 (m, 1H), 3.92 (t, *J* = 7.7 Hz, 1H), 3.78 (t, *J* = 8.8 Hz, 1H), 1.30 (t, *J* = 7.1 Hz, 3H).

<sup>13</sup>C NMR (126 MHz, CDCl<sub>3</sub>)  $\delta$  168.3, 165.9, 145.7, 134.3, 129.5, 124.4, 120.4, 117.6, 114.7, 112.6, 111.8, 64.7, 61.8, 58.7, 48.3, 44.0, 14.2.

**5-(4-bromobutyl)-2-phenyl-1,2,3,3a-tetrahydroimidazo[1,5-a]quinoxalin-4(5H)-one (4ka)**

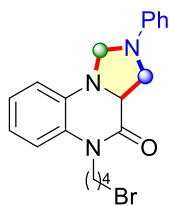

$^1\text{H}$  NMR (500 MHz,  $\text{CDCl}_3$ )  $\delta$  7.31 (t,  $J = 7.8$  Hz, 2H), 7.19 (d,  $J = 8.0$  Hz, 1H), 7.09 (t,  $J = 7.6$  Hz, 1H), 6.97 (t,  $J = 7.7$  Hz, 1H), 6.81 (t,  $J = 7.3$  Hz, 1H), 6.70 – 6.61 (m, 3H), 4.79 (d,  $J = 3.2$  Hz, 1H), 4.66 (d,  $J = 3.1$  Hz, 1H), 4.08 – 4.03 (m, 1H), 4.02 – 3.96 (m, 1H), 3.94 – 3.89 (m, 1H), 3.89 – 3.83 (m, 1H), 3.78 (t,  $J = 8.8$  Hz, 1H), 1.65 (s, 1H), 1.24 – 1.16 (m, 1H), 0.58 – 0.47 (m, 3H), 0.46 – 0.39 (m, 1H).

$^{13}\text{C}$  NMR (126 MHz,  $\text{CDCl}_3$ )  $\delta$  165.4, 145.8, 134.6, 129.7, 129.6, 124.0, 120.2, 117.5, 115.6, 112.4, 111.8, 64.8, 58.8, 48.6, 46.0, 9.9, 4.5, 4.0.

HRMS (ESI)  $m/z$  calcd for  $\text{C}_{20}\text{H}_{23}\text{BrN}_3\text{O}$   $[\text{M}+\text{H}]^+$ : 400.1019, Found:400.1023

**Benzyl-4-oxo-2-phenyl-2,3,3a,4-tetrahydroimidazo[1,5-a]quinoxaline-5(1H)-carboxylate (4la)<sup>3</sup>**

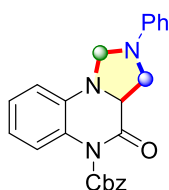

$^1\text{H}$  NMR (500 MHz,  $\text{CDCl}_3$ )  $\delta$  7.34 – 7.28 (m, 4H), 7.25 (d,  $J = 7.2$  Hz, 3H), 7.03 (t,  $J = 7.6$  Hz, 1H), 6.93 (d,  $J = 8.0$  Hz, 1H), 6.81 (t,  $J = 7.7$  Hz, 2H), 6.65 (d,  $J = 7.8$  Hz, 3H), 5.44 (d,  $J = 16.2$  Hz, 1H), 4.97 (d,  $J = 16.2$  Hz, 1H), 4.79 (d,  $J = 3.2$  Hz, 1H), 4.66 (d,  $J = 3.2$  Hz, 1H), 4.15 (d,  $J = 7.4$  Hz, 1H), 3.95 (t,  $J = 7.7$  Hz, 1H), 3.84 (t,  $J = 8.9$  Hz, 1H).

$^{13}\text{C}$  NMR (126 MHz,  $\text{CDCl}_3$ )  $\delta$  165.8, 145.8, 136.5, 134.6, 129.7, 129.6, 128.9, 127.4, 126.6, 124.2, 120.3, 117.6, 116.1, 112.3, 111.8, 64.8, 58.9, 48.6, 45.9.

**8-methoxy-5-methyl-2-phenyl-1,2,3,3a-tetrahydroimidazo[1,5-a]quinoxalin-4(5H)-one (4ma)<sup>2</sup>**

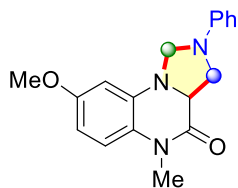

$^1\text{H}$  NMR (500 MHz,  $\text{CDCl}_3$ )  $\delta$  7.30 (t,  $J = 7.9$  Hz, 2H), 6.92 (d,  $J = 8.8$  Hz, 1H), 6.81 (t,  $J = 7.3$  Hz, 1H), 6.63 (d,  $J = 8.1$  Hz, 2H), 6.51 – 6.42 (m, 1H), 6.22 (d,  $J = 2.6$  Hz, 1H), 4.73 (d,  $J = 3.4$  Hz, 1H), 4.62 (d,  $J = 3.3$  Hz, 1H), 4.06 – 4.01 (m, 1H), 3.94 – 3.90 (m, 1H), 3.82 (s, 3H), 3.73 (t,  $J = 8.9$  Hz, 1H), 3.39 (s, 3H).

$^{13}\text{C}$  NMR (126 MHz,  $\text{CDCl}_3$ )  $\delta$  164.9, 156.7, 145.8, 135.4, 129.6, 124.3, 117.6, 115.8, 111.8, 103.6, 99.4, 64.7, 58.8, 55.7, 48.6, 29.2.

**8-fluoro-5-methyl-2-phenyl-1,2,3,3a-tetrahydroimidazo[1,5-a]quinoxalin-4(5H)-one (4na)<sup>1</sup>**

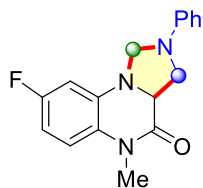

$^1\text{H}$  NMR (500 MHz,  $\text{CDCl}_3$ )  $\delta$  7.31 (t,  $J = 7.8$  Hz, 2H), 6.95 – 6.89 (m, 1H), 6.82 (t,  $J = 7.3$  Hz, 1H), 6.67 – 6.59 (m, 3H), 6.41 – 6.34 (m, 1H), 4.70 (d,  $J = 3.3$  Hz, 1H), 4.63 (d,  $J = 3.3$  Hz, 1H), 4.10 – 4.05 (m, 1H), 3.97 – 3.90 (m, 1H), 3.72 (t,  $J = 8.9$  Hz, 1H), 3.40 (s, 3H).

$^{13}\text{C}$  NMR (126 MHz,  $\text{CDCl}_3$ )  $\delta$  164.8, 159 (d,  $J = 121.6$  Hz), 154.6, 135.4 (d,  $J = 5.6$  Hz), 129.6, 126.5 (d,  $J = 2.5$  Hz), 117.8, 115.9 (d,  $J = 5.0$  Hz), 111.9, 105.7 (d,  $J = 11.9$  Hz), 99.8 (d,  $J = 13.2$  Hz), 64.6, 58.4, 48.7, 29.2.

$^{19}\text{F}$  NMR (471 MHz,  $\text{CDCl}_3$ )  $\delta$  -118.2.

**8-chloro-5-methyl-2-phenyl-1,2,3,3a-tetrahydroimidazo[1,5-a]quinoxalin-4(5H)-one (4oa)<sup>3</sup>**



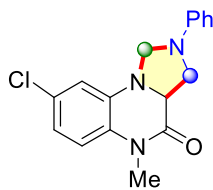

$^1\text{H}$  NMR (500 MHz,  $\text{CDCl}_3$ )  $\delta$  7.30 (t,  $J = 7.9$  Hz, 2H), 6.90 (s, 2H), 6.82 (t,  $J = 7.3$  Hz, 1H), 6.65 – 6.60 (m, 3H), 4.70 (d,  $J = 3.3$  Hz, 1H), 4.65 (d,  $J = 3.3$  Hz, 1H), 4.10 – 4.05 (m, 1H), 3.96 – 3.91 (m, 1H), 3.71 (t,  $J = 8.9$  Hz, 1H), 3.39 (s, 3H).

$^{13}\text{C}$  NMR (126 MHz,  $\text{CDCl}_3$ )  $\delta$  165.0, 145.6, 135.0, 129.6, 129.4, 129.0, 119.6, 117.8, 115.9, 112.1, 111.9, 64.6, 58.5, 48.6, 29.2.

**8-bromo-5-methyl-2-phenyl-1,2,3,3a-tetrahydroimidazo[1,5-a]quinoxalin-4(5H)-one (4pa)<sup>3</sup>**

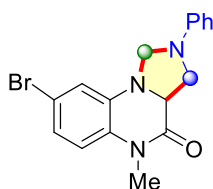

$^1\text{H}$  NMR (500 MHz,  $\text{CDCl}_3$ )  $\delta$  7.30 (t,  $J = 7.9$  Hz, 2H), 7.07 – 7.02 (m, 1H), 6.86 – 6.80 (m, 2H), 6.74 (d,  $J = 1.9$  Hz, 1H), 6.62 (d,  $J = 8.2$  Hz, 2H), 4.69 (d,  $J = 3.4$  Hz, 1H), 4.63 (d,  $J = 3.4$  Hz, 1H), 4.09 – 4.04 (m, 1H), 3.95 – 3.90 (m, 1H), 3.71 (t,  $J = 8.9$  Hz, 1H), 3.38 (s, 3H).

$^{13}\text{C}$  NMR (126 MHz,  $\text{CDCl}_3$ )  $\delta$  165.0, 145.6, 135.2, 129.6, 129.4, 122.6, 117.8, 116.9, 116.3, 114.8, 111.9, 64.6, 58.4, 48.6, 29.1.

**5-methyl-2-phenyl-8-(trifluoromethyl)-1,2,3,3a-tetrahydroimidazo[1,5-a]quinoxalin-4(5H)-one(4pa)<sup>5</sup>**

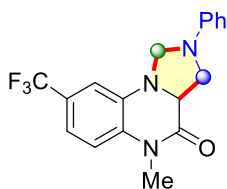

$^1\text{H}$  NMR (500 MHz,  $\text{CDCl}_3$ )  $\delta$  7.31 (t,  $J = 7.7$  Hz, 2H), 7.22 (d,  $J = 8.2$  Hz, 1H), 7.07 (d,  $J = 8.3$  Hz, 1H), 6.84 (d,  $J = 7.8$  Hz, 2H), 6.65 (d,  $J = 8.0$  Hz, 2H), 4.76 (d,  $J = 2.8$

Hz, 1H), 4.72 (s, 1H), 4.15 – 4.09 (m, 1H), 3.95 (t,  $J = 7.6$  Hz, 1H), 3.74 (t,  $J = 8.8$  Hz, 1H), 3.44 (s, 3H).

$^{13}\text{C}$  NMR (126 MHz,  $\text{CDCl}_3$ )  $\delta$  165.3, 145.6, 134.2, 132.9, 129.6, 126.2 (q,  $J = 65.5$  Hz) 124.2 (q,  $J = 544.3$  Hz), 117.9, 117.6 (q,  $J = 8.8$  Hz), 114.9, 112.0, 108.6 (q,  $J = 7.6$  Hz), 64.6, 58.4, 48.6, 29.2.

$^{19}\text{F}$  NMR (471 MHz,  $\text{CDCl}_3$ )  $\delta$  -62.0.

### 2-phenyl-1,2,3,3a-tetrahydroimidazo[1,5-a]quinoxalin-4(5H)-one (4ra)<sup>2</sup>

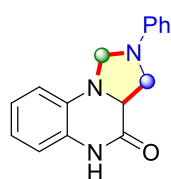

$^1\text{H}$  NMR (500 MHz,  $\text{DMSO}-d_6$ )  $\delta$  10.61 (s, 1H), 7.23 (t,  $J = 7.4$  Hz, 2H), 6.99 – 6.90 (m, 2H), 6.84 – 6.77 (m, 2H), 6.74 – 6.65 (m, 3H), 4.79 (d,  $J = 3.8$  Hz, 1H), 4.52 (d,  $J = 3.8$  Hz, 1H), 4.11 (t,  $J = 7.8$  Hz, 1H), 3.76 (t,  $J = 7.6$  Hz, 1H), 3.50 (t,  $J = 8.7$  Hz, 1H).

$^{13}\text{C}$  NMR (126 MHz,  $\text{DMSO}-d_6$ )  $\delta$  165.7, 145.9, 132.8, 129.2, 127.9, 123.2, 119.7, 116.8, 115.2, 112.6, 111.9, 64.6, 58.0, 47.8.

### 5-methyl-2-phenyl-1,2,3,3a-tetrahydrobenzo[g]imidazo[1,5-a]quinoxalin-4(5H)-one (4sa)<sup>2</sup>

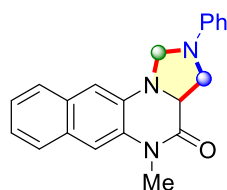

$^1\text{H}$  NMR (500 MHz,  $\text{CDCl}_3$ )  $\delta$  7.75 – 7.68 (m, 2H), 7.41 (t,  $J = 7.4$  Hz, 1H), 7.36 – 7.29 (m, 4H), 6.87 – 6.82 (m, 2H), 6.66 (d,  $J = 8.1$  Hz, 2H), 4.78 (d,  $J = 3.4$  Hz, 1H), 4.67 (d,  $J = 3.3$  Hz, 1H), 4.09 – 4.04 (m, 1H), 3.94 (t,  $J = 7.6$  Hz, 1H), 3.73 (t,  $J = 8.9$  Hz, 1H), 3.50 (s, 3H).

$^{13}\text{C}$  NMR (126 MHz,  $\text{CDCl}_3$ )  $\delta$  166.1, 145.7, 133.7, 131.3, 130.9, 129.5, 128.5, 127.5, 125.9, 124.1, 117.6, 112.3, 111.8, 107.0, 64.8, 58.7, 48.6, 29.3.

**2-([1,1'-biphenyl]-4-yl)-5-methyl-1,2,3,3a-tetrahydroimidazo[1,5-a]quinoxalin-4(5H)-one (4ab)**

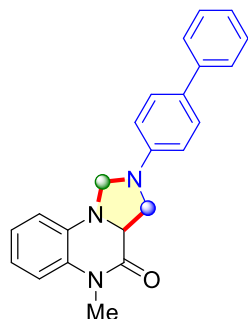

$^1\text{H}$  NMR (500 MHz,  $\text{CDCl}_3$ )  $\delta$  7.44 (t,  $J = 7.4$  Hz, 4H), 7.29 (t,  $J = 7.5$  Hz, 2H), 7.16 (t,  $J = 7.2$  Hz, 1H), 6.97 (t,  $J = 7.5$  Hz, 1H), 6.90 (d,  $J = 7.8$  Hz, 1H), 6.85 (t,  $J = 7.6$  Hz, 1H), 6.57 (d,  $J = 8.3$  Hz, 2H), 6.53 (d,  $J = 7.7$  Hz, 1H), 4.65 (d,  $J = 2.9$  Hz, 1H), 4.53 (d,  $J = 2.9$  Hz, 1H), 3.92 – 3.86 (m, 1H), 3.82 (t,  $J = 7.5$  Hz, 1H), 3.66 (t,  $J = 8.7$  Hz, 1H), 3.28 (s, 3H).

$^{13}\text{C}$  NMR (126 MHz,  $\text{CDCl}_3$ )  $\delta$  165.5, 145.1, 141.0, 134.2, 130.4, 130.3, 128.8, 128.1, 126.4, 126.3, 124.1, 120.3, 115.2, 112.1, 112.1, 64.6, 58.8, 48.6, 29.1.

HRMS (ESI)  $m/z$  calcd for  $\text{C}_{23}\text{H}_{22}\text{N}_3\text{O}$   $[\text{M}+\text{H}]^+$  : 356.1757, found: 356.1753

**5-methyl-2-(p-tolyl)-1,2,3,3a-tetrahydroimidazo[1,5-a]quinoxalin-4(5H)-one (4ac)<sup>4</sup>**

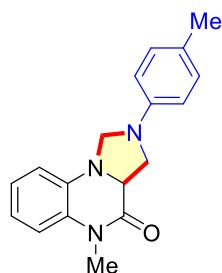

$^1\text{H}$  NMR (500 MHz,  $\text{CDCl}_3$ )  $\delta$  7.12 (d,  $J = 8.2$  Hz, 2H), 7.08 (t,  $J = 8.0$  Hz, 1H), 7.03 (d,  $J = 7.7$  Hz, 1H), 6.96 (t,  $J = 7.7$  Hz, 1H), 6.66 (d,  $J = 7.7$  Hz, 1H), 6.57 (d,  $J = 8.3$  Hz, 2H), 4.72 (d,  $J = 3.2$  Hz, 1H), 4.65 (d,  $J = 3.2$  Hz, 1H), 4.07 – 4.01 (m, 1H), 3.93 – 3.88 (m, 1H), 3.73 (t,  $J = 8.8$  Hz, 1H), 3.42 (s, 3H), 2.29 (s, 3H).

$^{13}\text{C}$  NMR (126 MHz,  $\text{CDCl}_3$ )  $\delta$  165.6, 143.8, 134.3, 130.4, 130.0, 126.8, 124.1, 120.1, 115.1, 112.1, 111.9, 65.0, 58.8, 48.8, 29.1, 20.4.

**2-(4-(tert-butyl)phenyl)-5-methyl-1,2,3,3a-tetrahydroimidazo[1,5-a]quinoxalin-4(5H)-one (4ad)<sup>3</sup>**

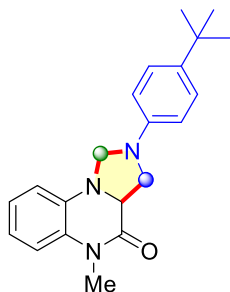

<sup>1</sup>H NMR (500 MHz, CDCl<sub>3</sub>) δ 7.35 (d, *J* = 8.5 Hz, 2H), 7.09 (t, *J* = 7.6 Hz, 1H), 7.03 (d, *J* = 7.8 Hz, 1H), 6.96 (d, *J* = 7.6 Hz, 1H), 6.67 (d, *J* = 7.7 Hz, 1H), 6.61 (d, *J* = 8.6 Hz, 2H), 4.76 (d, *J* = 3.1 Hz, 1H), 4.67 (d, *J* = 3.1 Hz, 1H), 4.07 – 4.02 (m, 1H), 3.96 – 3.90 (m, 1H), 3.75 (t, *J* = 8.8 Hz, 1H), 3.43 (s, 3H), 1.32 (s, 9H).

<sup>13</sup>C NMR (126 MHz, CDCl<sub>3</sub>) δ 165.7, 143.7, 140.3, 134.4, 130.5, 126.4, 124.1, 120.2, 115.2, 112.2, 111.6, 64.9, 58.9, 48.8, 34.0, 31.7, 29.1.

**2-(4-methoxyphenyl)-5-methyl-1,2,3,3a-tetrahydroimidazo[1,5-a]quinoxalin-4(5H)-one (4ae)<sup>1</sup>**

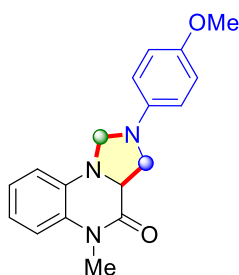

<sup>1</sup>H NMR (500 MHz, CDCl<sub>3</sub>) δ 7.07 (t, *J* = 7.6 Hz, 1H), 7.02 (d, *J* = 7.9 Hz, 1H), 6.95 (t, *J* = 8.3 Hz, 1H), 6.90 (d, *J* = 8.8 Hz, 2H), 6.65 (d, *J* = 7.7 Hz, 1H), 6.60 (d, *J* = 8.8 Hz, 2H), 4.67 (d, *J* = 5.6 Hz, 2H), 4.09 – 4.04 (m, 1H), 3.87 (t, *J* = 7.5 Hz, 1H), 3.78 (s, 3H), 3.70 (t, *J* = 8.7 Hz, 1H), 3.41 (s, 3H).

<sup>13</sup>C NMR (126 MHz, CDCl<sub>3</sub>) δ 165.6, 152.2, 140.7, 134.3, 130.4, 124.1, 120.1, 115.2, 115.1, 112.9, 112.2, 65.5, 58.9, 55.9, 49.3, 29.1.

**5-methyl-2-(4-(trifluoromethoxy)phenyl)-1,2,3,3a-tetrahydroimidazo[1,5-a]quinoxalin-4(5H)-one (4af)<sup>5</sup>**

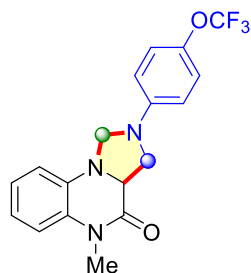

<sup>1</sup>H NMR (500 MHz, CDCl<sub>3</sub>)  $\delta$  7.16 (d,  $J$  = 8.6 Hz, 2H), 7.11 – 7.06 (m, 1H), 7.06 – 7.02 (m, 1H), 7.01 – 6.96 (m, 1H), 6.67 – 6.64 (m, 1H), 6.57 (d,  $J$  = 9.0 Hz, 2H), 4.74 (d,  $J$  = 3.3 Hz, 1H), 4.63 (d,  $J$  = 3.3 Hz, 1H), 4.07 – 4.02 (m, 1H), 3.92 – 3.86 (m, 1H), 3.75 (t,  $J$  = 8.8 Hz, 1H), 3.42 (s, 3H).

<sup>13</sup>C NMR (126 MHz, CDCl<sub>3</sub>)  $\delta$  165.4, 144.6, 140.7, 134.1, 130.5, 124.2, 122.8, 120.8(d,  $J$  = 127.9Hz), 120.5, 115.3, 112.2, 112.1, 64.8, 58.9, 48.8, 29.1.

<sup>19</sup>F NMR (471 MHz, CDCl<sub>3</sub>)  $\delta$  -58.5.

**5-methyl-2-(4-(methylthio)phenyl)-1,2,3,3a-tetrahydroimidazo[1,5-a]quinoxalin-4(5H)-one (4ag)**

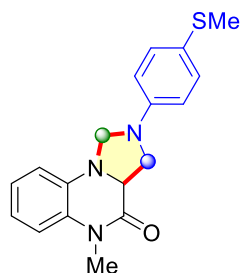

<sup>1</sup>H NMR (500 MHz, CDCl<sub>3</sub>)  $\delta$  7.32 (d,  $J$  = 8.0 Hz, 2H), 7.08 (t,  $J$  = 7.5 Hz, 1H), 7.03 (d,  $J$  = 7.9 Hz, 1H), 6.96 (t,  $J$  = 7.6 Hz, 1H), 6.64 (d,  $J$  = 7.7 Hz, 1H), 6.57 (d,  $J$  = 8.1 Hz, 2H), 4.73 (s, 1H), 4.62 (s, 1H), 4.02 (t,  $J$  = 7.9 Hz, 1H), 3.89 (t,  $J$  = 7.6 Hz, 1H), 3.74 (d,  $J$  = 8.8 Hz, 1H), 3.41 (s, 3H), 2.43 (s, 3H).

<sup>13</sup>C NMR (126 MHz, CDCl<sub>3</sub>)  $\delta$  165.5, 144.5, 134.2, 131.5, 130.4, 124.8, 124.1, 120.3, 115.2, 112.5, 112.2, 64.7, 58.8, 48.6, 29.1, 19.1.

HRMS (ESI)  $m/z$  calcd for C<sub>18</sub>H<sub>20</sub>N<sub>3</sub>OS [M+H]<sup>+</sup> : 326.1322, found 326.1325

**2-(4-fluorophenyl)-5-methyl-1,2,3,3a-tetrahydroimidazo[1,5-a]quinoxalin-4(5H)-one (4ah)<sup>1</sup>**

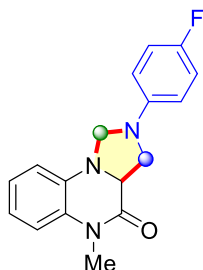

<sup>1</sup>H NMR (500 MHz, CDCl<sub>3</sub>)  $\delta$  7.08 (t,  $J = 7.5$  Hz, 1H), 7.05 – 6.94 (m, 4H), 6.64 (d,  $J = 7.7$  Hz, 1H), 6.57 – 6.52 (m, 2H), 4.70 (s, 1H), 4.65 (s, 1H), 4.05 (t,  $J = 7.8$  Hz, 1H), 3.87 (t,  $J = 7.5$  Hz, 1H), 3.72 (t,  $J = 8.7$  Hz, 1H), 3.42 (s, 3H).

<sup>13</sup>C NMR (126 MHz, CDCl<sub>3</sub>)  $\delta$  165.5, 156.0 (d,  $J = 118.44$  Hz), 142.5, 134.2, 130.4, 124.1, 120.3, 116.05 (d,  $J = 22.68$  Hz), 115.2, 112.5 (d,  $J = 7.6$  Hz), 112.2, 65.3, 58.9, 49.1, 29.1.

<sup>19</sup>F NMR (471 MHz, CDCl<sub>3</sub>)  $\delta$  -128.0.

**2-(4-chlorophenyl)-5-methyl-1,2,3,3a-tetrahydroimidazo[1,5-a]quinoxalin-4(5H)-one (4ai)<sup>1</sup>**

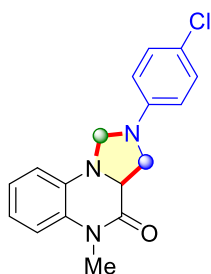

<sup>13</sup>C NMR (126 MHz, CDCl<sub>3</sub>)  $\delta$  7.23 (d,  $J = 8.8$  Hz, 2H), 7.08 (t,  $J = 7.3$  Hz, 1H), 7.03 (d,  $J = 7.5$  Hz, 1H), 6.97 (t,  $J = 7.6$  Hz, 1H), 6.64 (d,  $J = 7.7$  Hz, 1H), 6.53 (d,  $J = 8.8$  Hz, 2H), 4.71 (d,  $J = 3.3$  Hz, 1H), 4.61 (d,  $J = 3.3$  Hz, 1H), 4.06 – 4.01 (m, 1H), 3.89 – 3.84 (m, 1H), 3.72 (t,  $J = 8.8$  Hz, 1H), 3.41 (s, 3H).

<sup>13</sup>C NMR (126 MHz, CDCl<sub>3</sub>)  $\delta$  165.4, 144.4, 134.1, 130.5, 129.4, 124.2, 122.5, 120.4, 115.3, 112.9, 112.2, 64.8, 58.8, 48.7, 29.1.

**2-(4-bromophenyl)-5-methyl-1,2,3,3a-tetrahydroimidazo[1,5-a]quinoxalin-4(5H)-one (4aj)<sup>2</sup>**

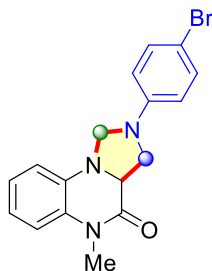

<sup>1</sup>H NMR (500 MHz, CDCl<sub>3</sub>)  $\delta$  7.35 (d,  $J$  = 8.8 Hz, 2H), 7.08 (t,  $J$  = 7.5 Hz, 1H), 7.02 (d,  $J$  = 7.7 Hz, 1H), 6.97 (t,  $J$  = 7.6 Hz, 1H), 6.63 (d,  $J$  = 7.8 Hz, 1H), 6.47 (d,  $J$  = 8.7 Hz, 2H), 4.69 (d,  $J$  = 3.3 Hz, 1H), 4.58 (d,  $J$  = 3.3 Hz, 1H), 4.04 – 3.99 (m, 1H), 3.87 – 3.83 (m, 1H), 3.70 (t,  $J$  = 8.8 Hz, 1H), 3.40 (s, 3H).

<sup>13</sup>C NMR (126 MHz, CDCl<sub>3</sub>)  $\delta$  165.4, 144.7, 134.1, 132.2, 130.4, 124.1, 120.4, 115.2, 113.3, 112.2, 109.5, 64.6, 58.8, 48.6, 29.1.

**5-methyl-2-(4-(trifluoromethyl)phenyl)-1,2,3,3a-tetrahydroimidazo[1,5-a]quinoxalin-4(5H)-one (4ak)<sup>2</sup>**

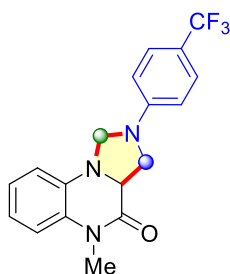

<sup>1</sup>H NMR (500 MHz, CDCl<sub>3</sub>)  $\delta$  7.53 (d,  $J$  = 8.5 Hz, 2H), 7.10 (t,  $J$  = 7.5 Hz, 1H), 7.05 (d,  $J$  = 7.7 Hz, 1H), 7.00 (t,  $J$  = 7.6 Hz, 1H), 6.69 – 6.62 (m, 3H), 4.83 (d,  $J$  = 3.4 Hz, 1H), 4.66 (d,  $J$  = 3.4 Hz, 1H), 4.08 – 4.03 (m, 1H), 3.98 – 3.94 (m, 1H), 3.81 (t,  $J$  = 8.9 Hz, 1H), 3.43 (s, 3H).

<sup>13</sup>C NMR (126 MHz, CDCl<sub>3</sub>)  $\delta$  165.4, 147.8, 134.0, 130.6, 126.9 (q,  $J$  = 7.6 Hz), 125.1 (d,  $J$  = 270.9 Hz), 124.2, 120.7, 119.2 (d,  $J$  = 32.8 Hz), 115.4, 112.3, 111.2, 64.4, 58.8, 48.5, 29.2.

<sup>19</sup>F NMR (471 MHz, CDCl<sub>3</sub>)  $\delta$  -61.0.

**5-methyl-2-(m-tolyl)-1,2,3,3a-tetrahydroimidazo[1,5-a]quinoxalin-4(5H)-one(4al)**

5

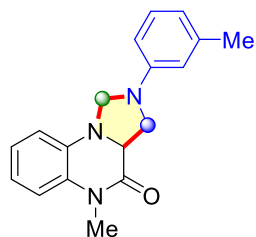

$^1\text{H}$  NMR (500 MHz,  $\text{CDCl}_3$ )  $\delta$  7.19 (t,  $J = 7.9$  Hz, 1H), 7.09 (t,  $J = 7.5$  Hz, 1H), 7.04 (d,  $J = 7.9$  Hz, 1H), 6.97 (t,  $J = 7.5$  Hz, 1H), 6.67 (d,  $J = 7.7$  Hz, 1H), 6.64 (d,  $J = 7.4$  Hz, 1H), 6.46 (d,  $J = 6.7$  Hz, 2H), 4.76 (d,  $J = 2.8$  Hz, 1H), 4.65 (d,  $J = 2.6$  Hz, 1H), 4.06 – 4.01 (m, 1H), 3.92 (t,  $J = 7.6$  Hz, 1H), 3.75 (t,  $J = 8.8$  Hz, 1H), 3.43 (s, 3H), 2.36 (s, 3H).

$^{13}\text{C}$  NMR (126 MHz,  $\text{CDCl}_3$ )  $\delta$  165.7, 145.9, 139.4, 134.4, 130.5, 129.4, 124.1, 120.2, 118.5, 115.2, 112.6, 112.1, 109.1, 64.8, 58.8, 48.6, 29.1, 21.9.

**5-methyl-2-(o-tolyl)-1,2,3,3a-tetrahydroimidazo[1,5-a]quinoxalin-4(5H)-one (4am) <sup>5</sup>**

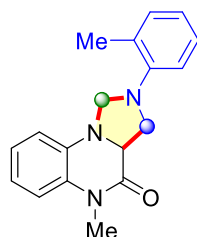

$^1\text{H}$  NMR (500 MHz,  $\text{CDCl}_3$ )  $\delta$  7.07 – 7.00 (m, 2H), 6.91 (t,  $J = 7.6$  Hz, 1H), 6.88 – 6.77 (m, 4H), 6.47 (d,  $J = 7.8$  Hz, 1H), 4.65 (d,  $J = 4.7$  Hz, 1H), 4.36 (d,  $J = 4.7$  Hz, 1H), 3.94 – 3.89 (m, 1H), 3.71 (t,  $J = 9.1$  Hz, 1H), 3.61 – 3.55 (m, 1H), 3.25 (s, 3H), 2.26 (s, 3H).

$^{13}\text{C}$  NMR (126 MHz,  $\text{CDCl}_3$ )  $\delta$  165.4, 147.5, 134.2, 131.7, 130.1, 130.1, 126.6, 123.9, 122.4, 119.8, 117.0, 114.9, 112.9, 69.0, 58.1, 52.9, 28.8, 19.9.



#### 4. Reference

1. Y.-F. Si, K. Sun, X.-L. Chen, X.-Y. Fu, Y. Liu, F.-L. Zeng, T. Shi, L.-B. Qu and B. Yu, *Org. Lett.*, 2020, **22**, 6960-6965.
2. J.-F. Cui, W.-Q. Zhong and J.-M. Huang, *J. Org. Chem.*, 2023, **88**, 1147-1154.
3. Z. Tang, C. Pi, Y. Wu and X. Cui, *Green Synth. Catal.*, 2022, DOI: 10.1016/j.gresc.2022.10.001.
4. Y.-F. Si, X.-L. Chen, X.-Y. Fu, K. Sun, X. Song, L.-B. Qu and B. Yu, *ACS Sustainable Chem. Eng.*, 2020, **8**, 10740-10746.
5. Y.-H. Lu, Z.-T. Zhang, H.-Y. Wu, M.-H. Zhou, H.-Y. Song, H.-T. Ji, J. Jiang, J.-Y. Chen and W.-M. He, *Chin. Chem. Lett.*, 2023, **34**, 108036.

## 5. <sup>1</sup>H NMR, <sup>13</sup>C NMR and <sup>19</sup>F NMR Spectra of Products

### 5-methyl-2-phenyl-1,2,3,3a-tetrahydroimidazo[1,5-a]quinoxalin-4(5H)-one (4aa)

#### 4aa <sup>1</sup>H NMR (500 MHz) and <sup>13</sup>C NMR (126 MHz)

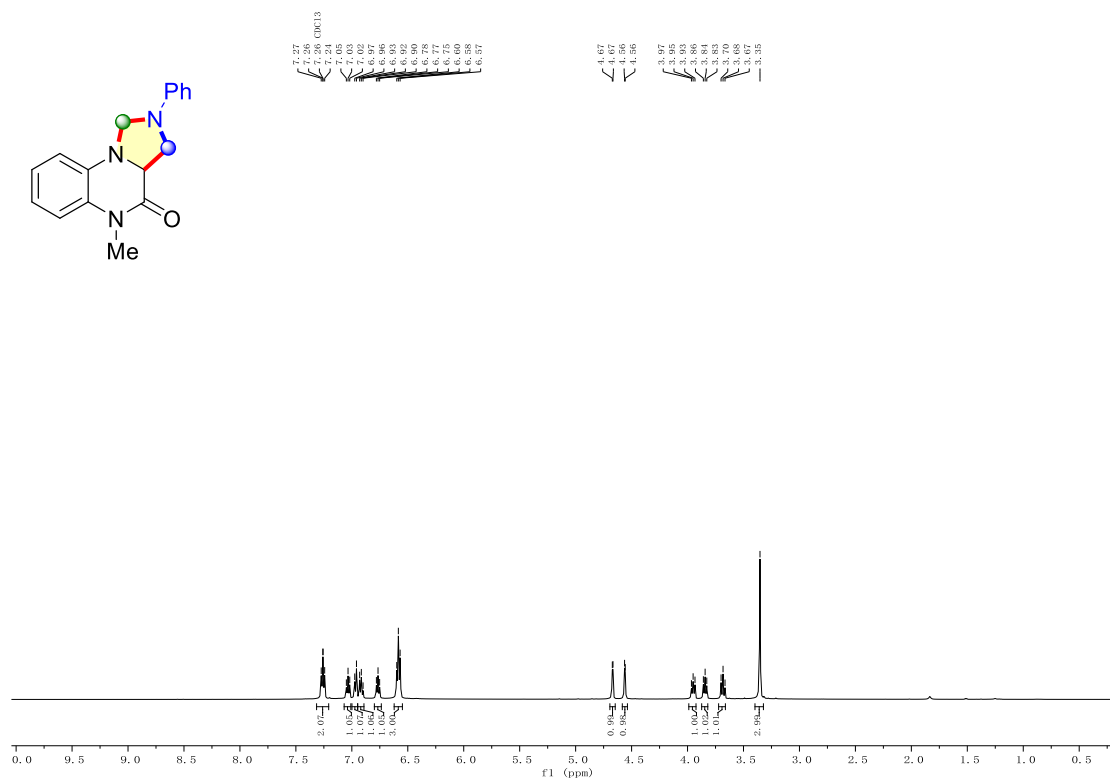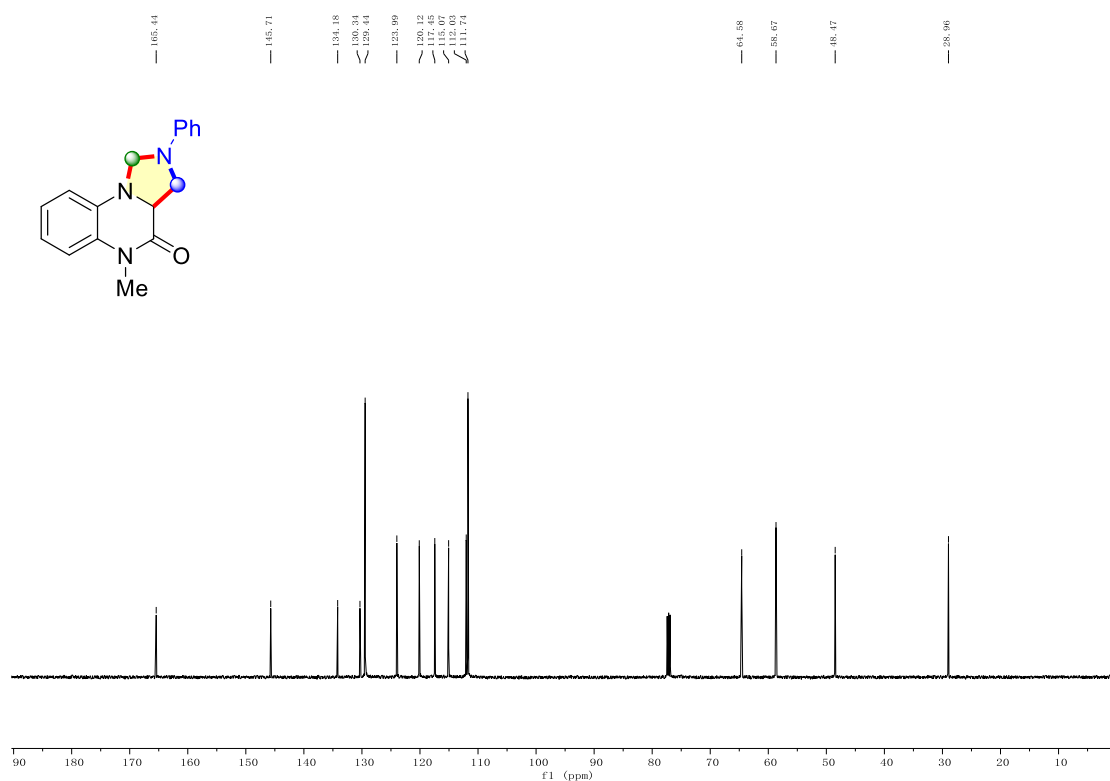

### 5-ethyl-2-phenyl-1,2,3,3a-tetrahydroimidazo[1,5-a]quinoxalin-4(5H)-one(4ba)



**5-cyclohexyl-2-phenyl-1,2,3,3a-tetrahydroimidazo[1,5-a]quinoxalin-4(5H)-one**  
**(4ca)**

**4ca <sup>1</sup>H NMR (500 MHz) and <sup>13</sup>C NMR (126 MHz)**

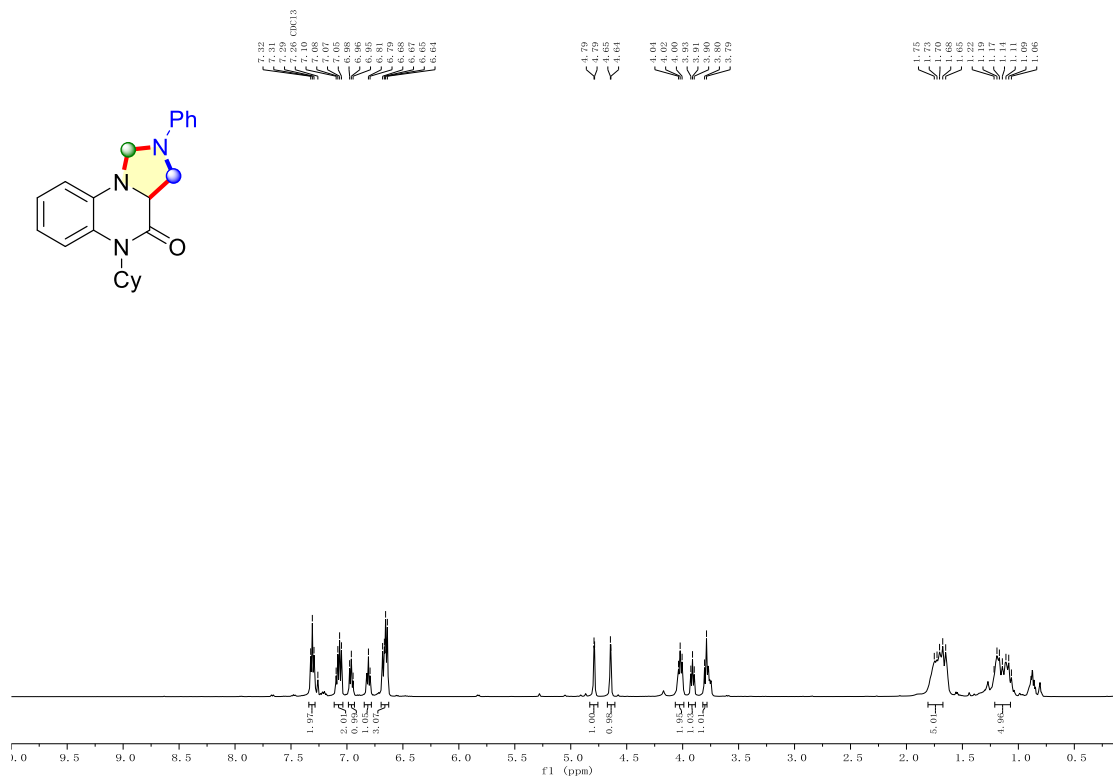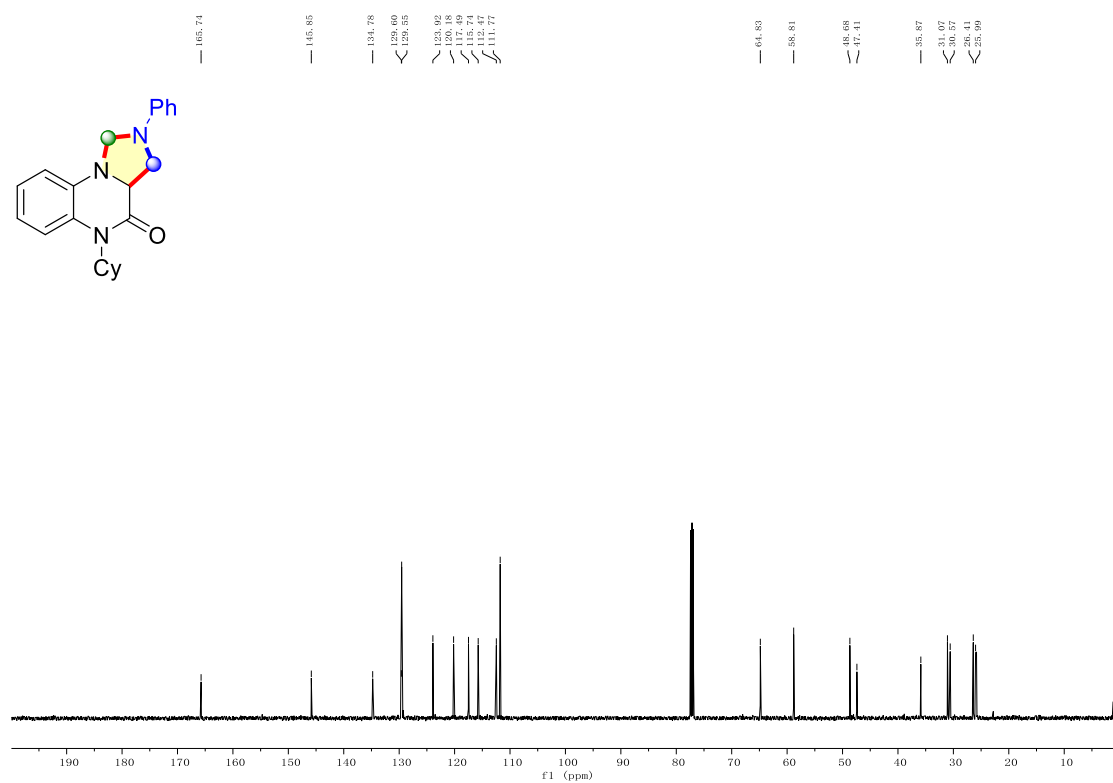





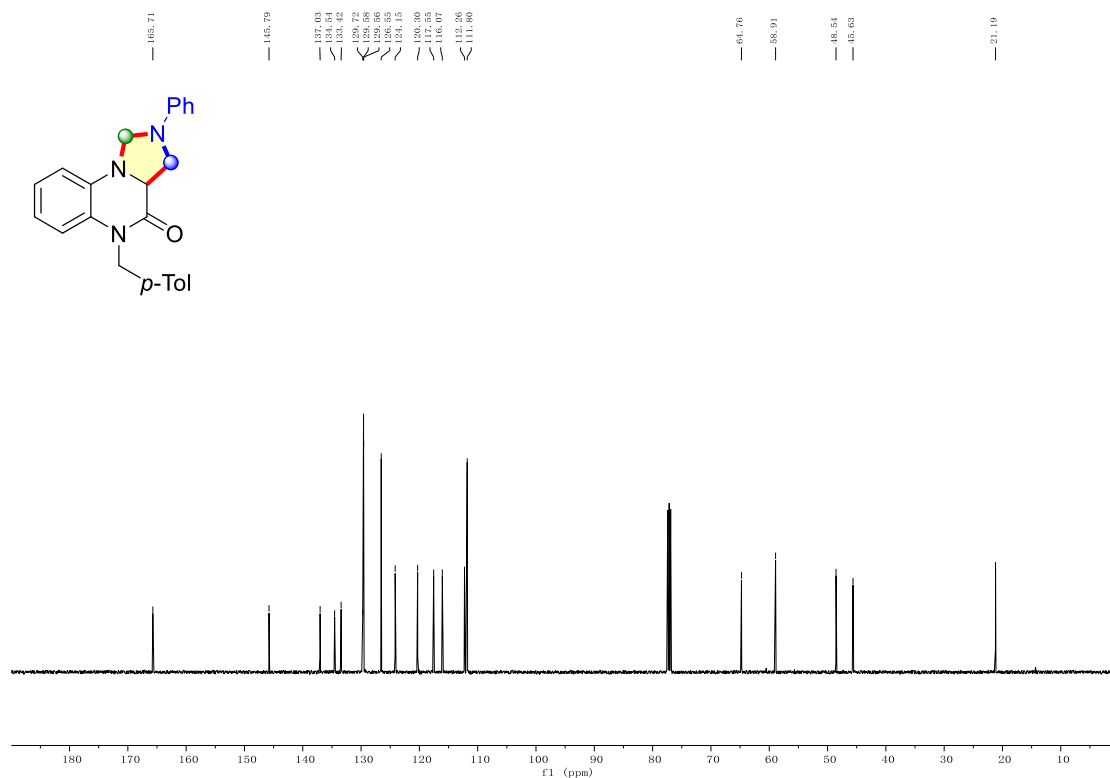

**5-(4-methoxybenzyl)-2-phenyl-1,2,3,3a-tetrahydroimidazo[1,5-a]quinoxalin-4(5H)-one (4fa)**

**4fa <sup>1</sup>H NMR (500 MHz) and <sup>13</sup>C NMR (126 MHz)**

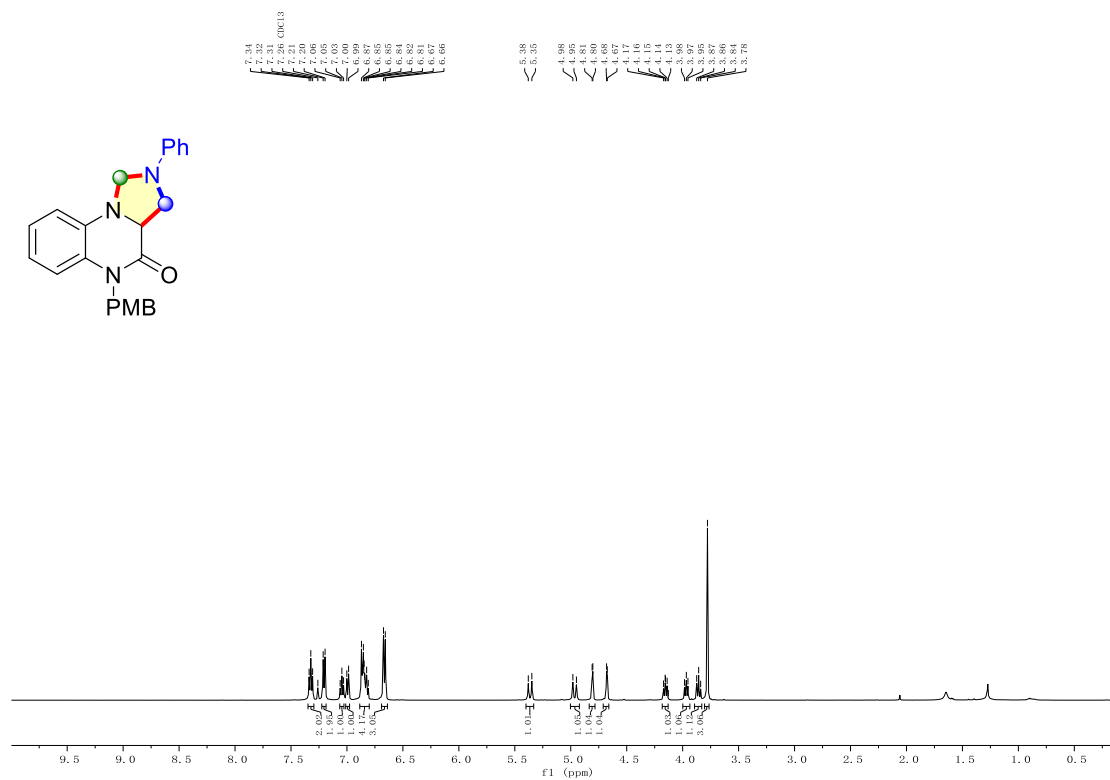

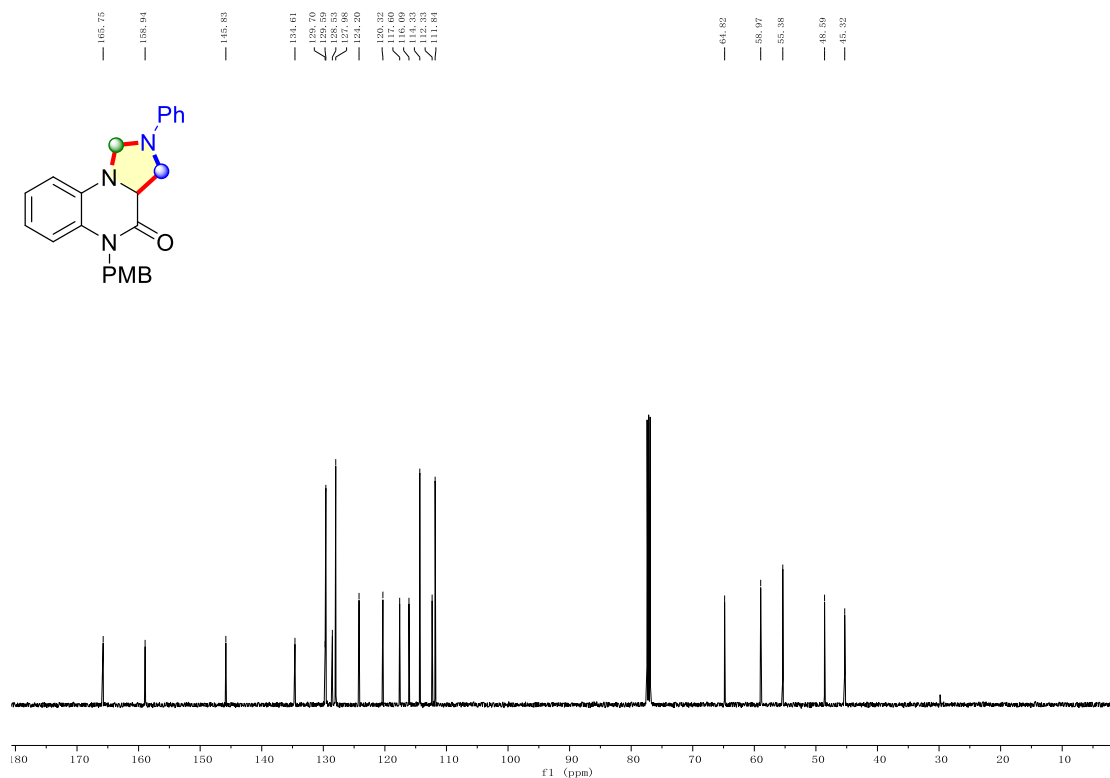

### 5-allyl-2-phenyl-1,2,3,3a-tetrahydroimidazo[1,5-a]quinoxalin-4(5H)-one (4ga)

4ga <sup>1</sup>H NMR (500 MHz) and <sup>13</sup>C NMR (126 MHz)

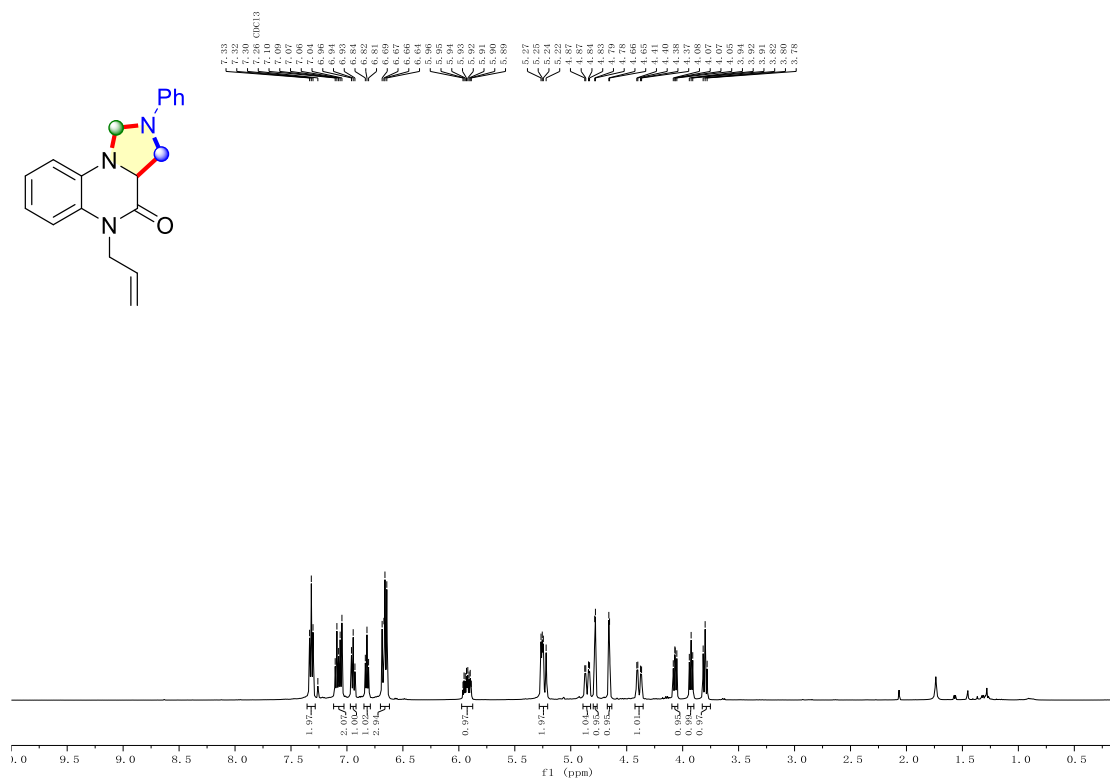



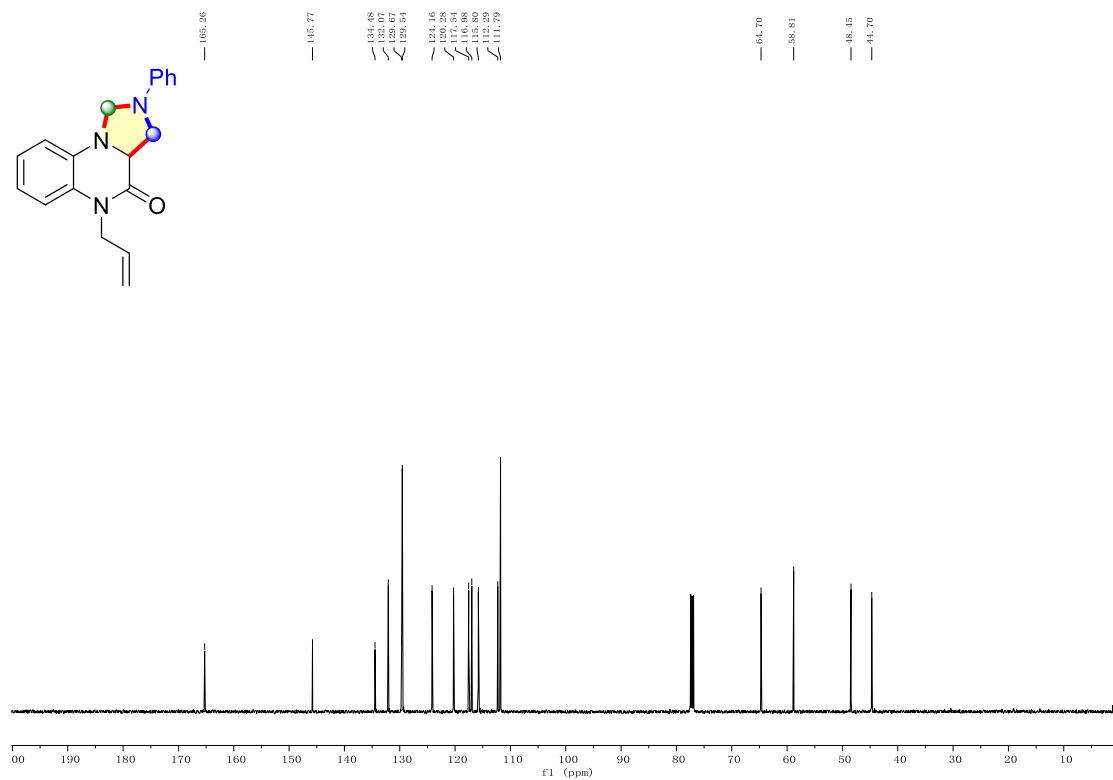

**2-phenyl-5-(prop-2-yn-1-yl)-1,2,3,3a-tetrahydroimidazo[1,5-a]quinoxalin-4(5H)-one (4ha)**

**4ha  $^1\text{H}$  NMR (500 MHz) and  $^{13}\text{C}$  NMR (126 MHz)**

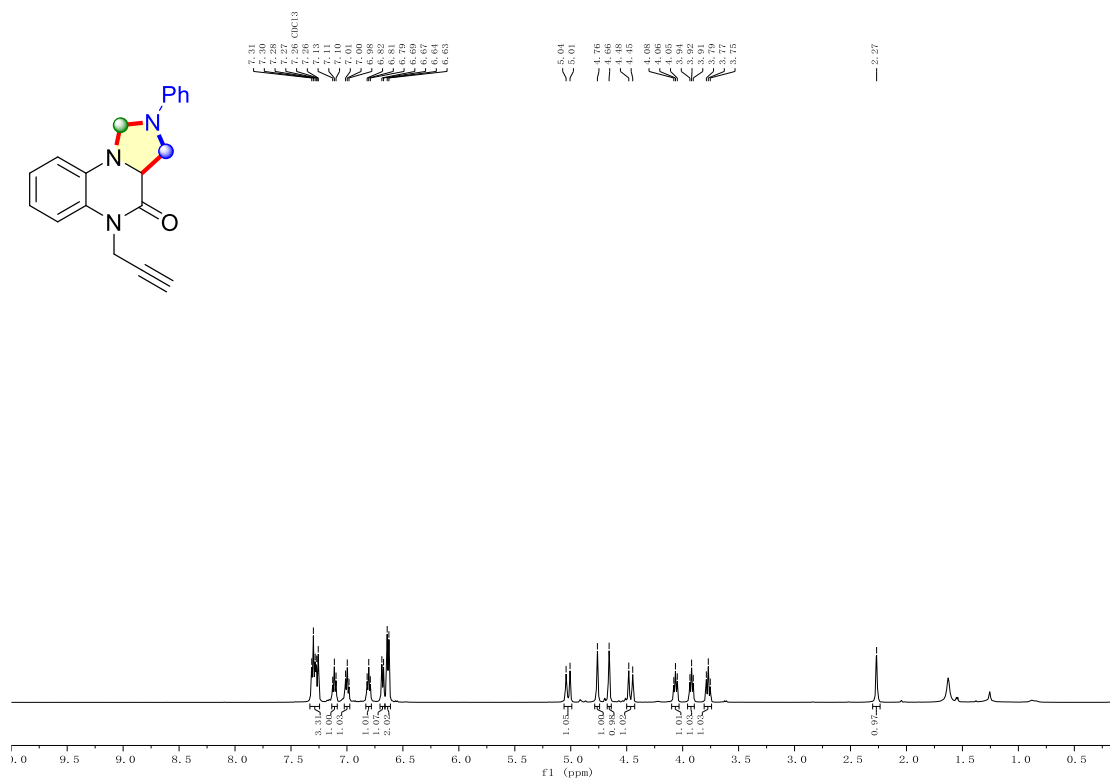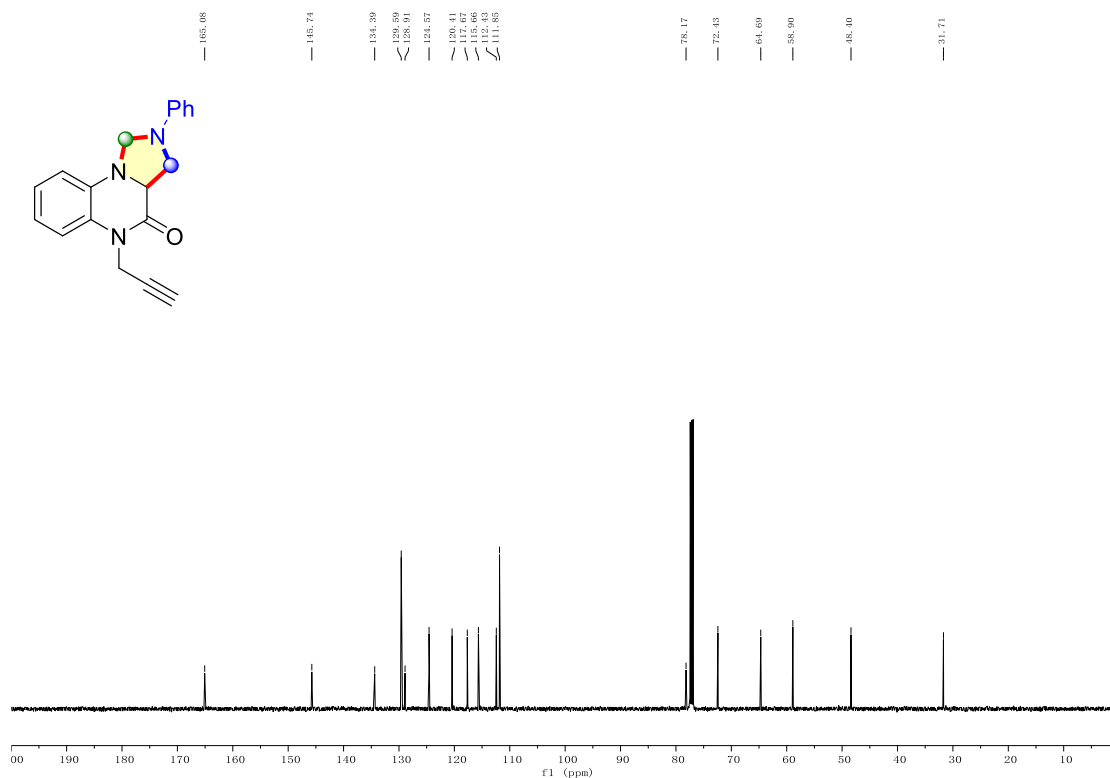

**2-(4-oxo-2-phenyl-2,3,3a,4-tetrahydroimidazo[1,5-a]quinoxalin-5(1H)-yl)acetonitrile (4ia)**

**4ia <sup>1</sup>H NMR (500 MHz) and <sup>13</sup>C NMR (126 MHz)**

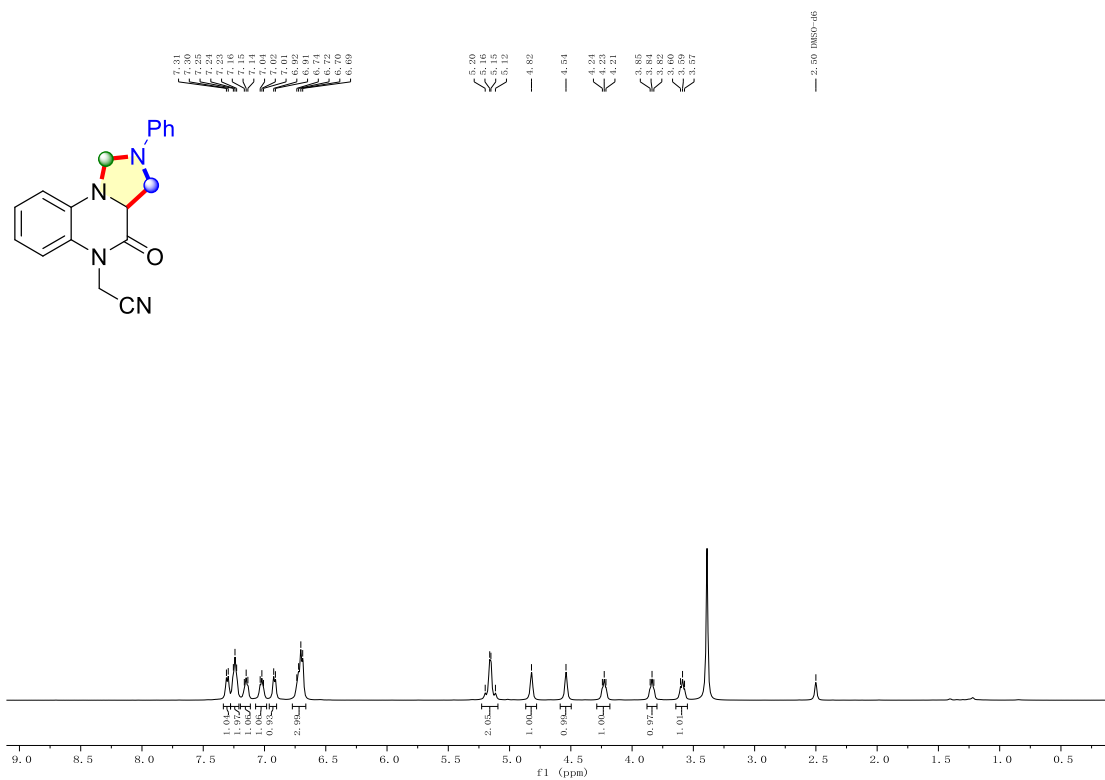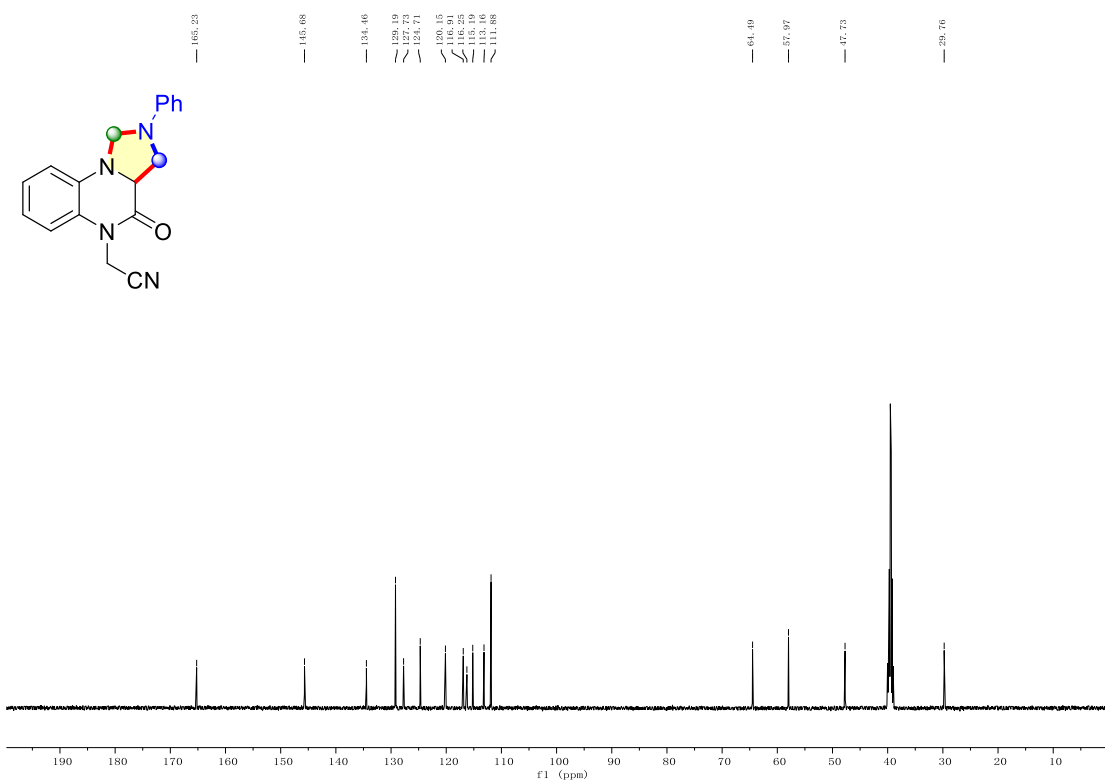

**Ethyl-2-(4-oxo-2-phenyl-2,3,3a,4-tetrahydroimidazo[1,5-a]quinoxalin-5(1*H*)-yl)acetate (4ja)**

**4ja <sup>1</sup>H NMR (500 MHz) and <sup>13</sup>C NMR (126 MHz)**

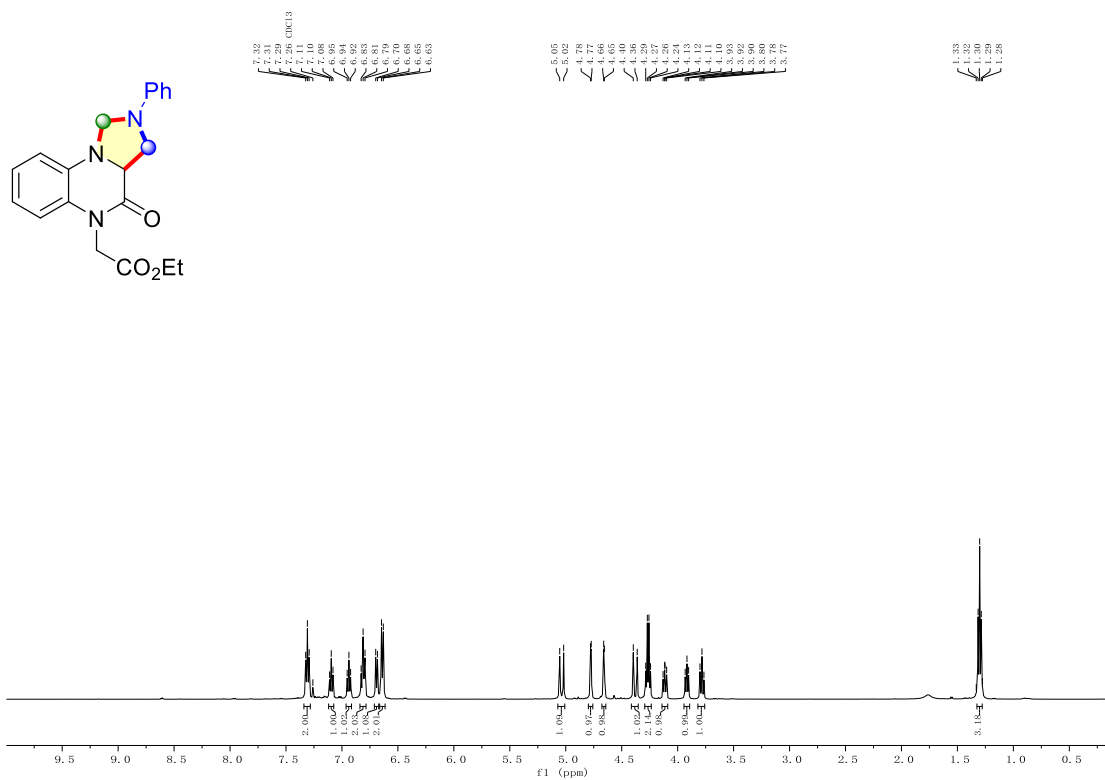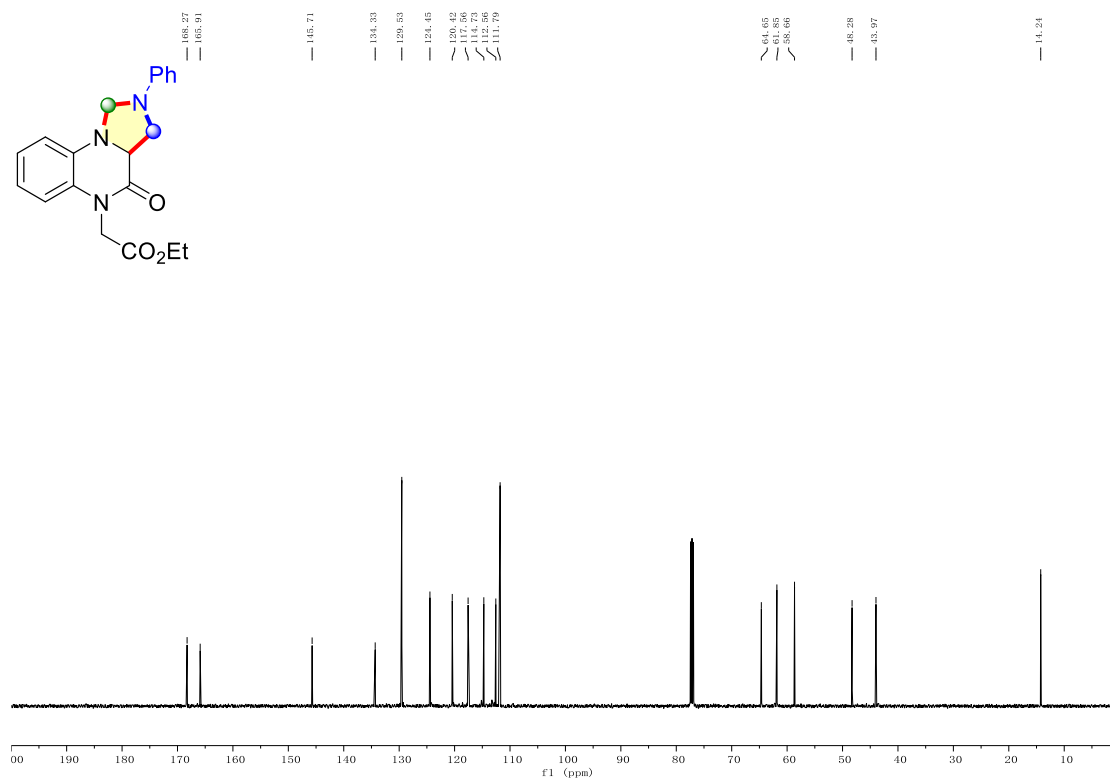

**5-(4-bromobutyl)-2-phenyl-1,2,3,3a-tetrahydroimidazo[1,5-a]quinoxalin-4(5H)-one (4ka)**

**4ka <sup>1</sup>H NMR (500 MHz) and <sup>13</sup>C NMR (126 MHz)**





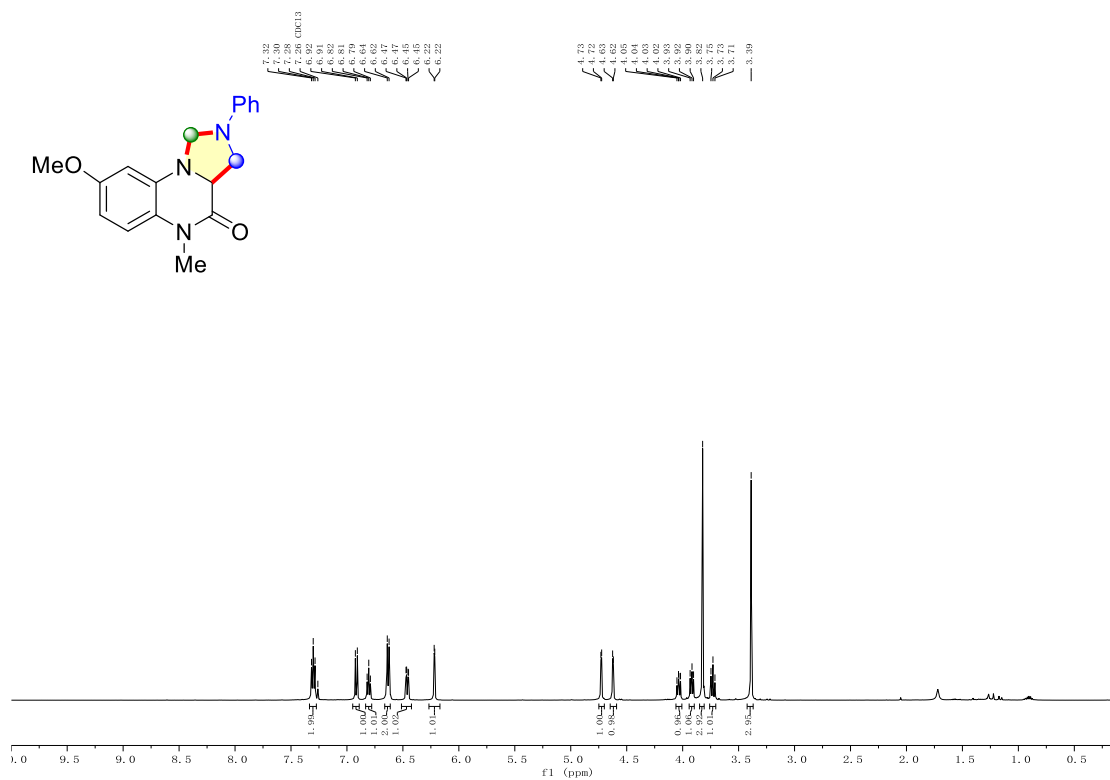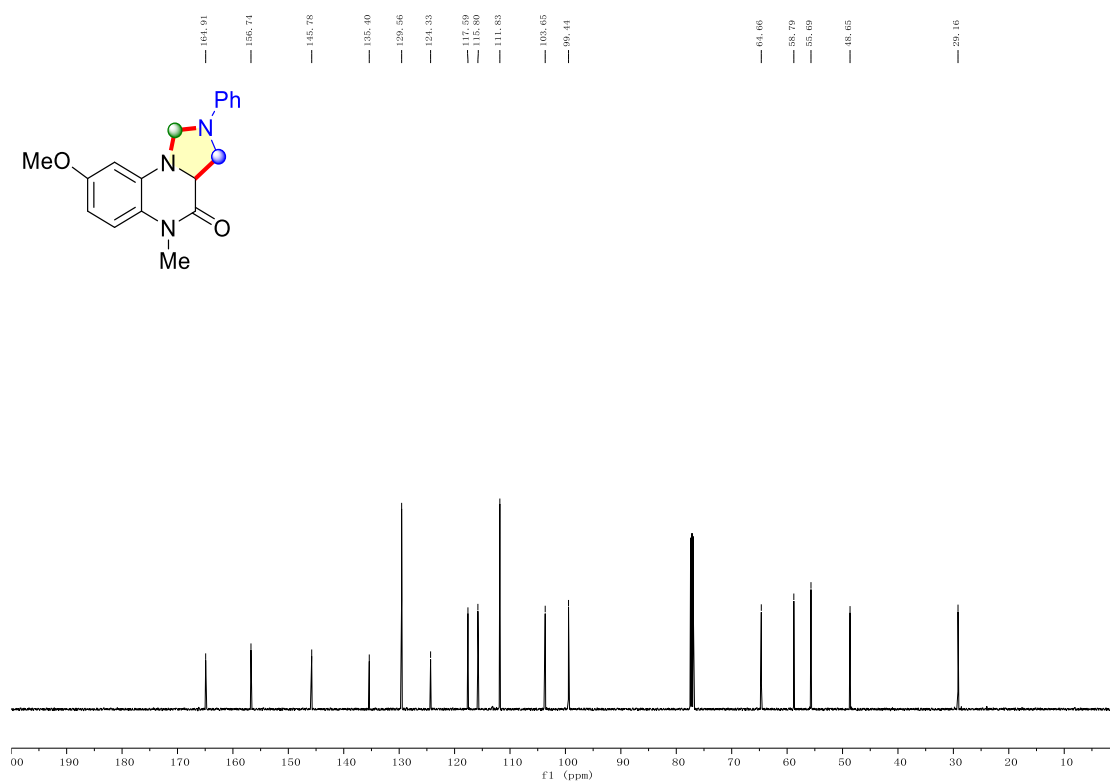

**8-fluoro-5-methyl-2-phenyl-1,2,3,3a-tetrahydroimidazo[1,5-a]quinoxalin-4(5H)-one (4na)**

**4na <sup>1</sup>H NMR (500 MHz) and <sup>13</sup>C NMR (126 MHz) and <sup>19</sup>F NMR (471 MHz)**

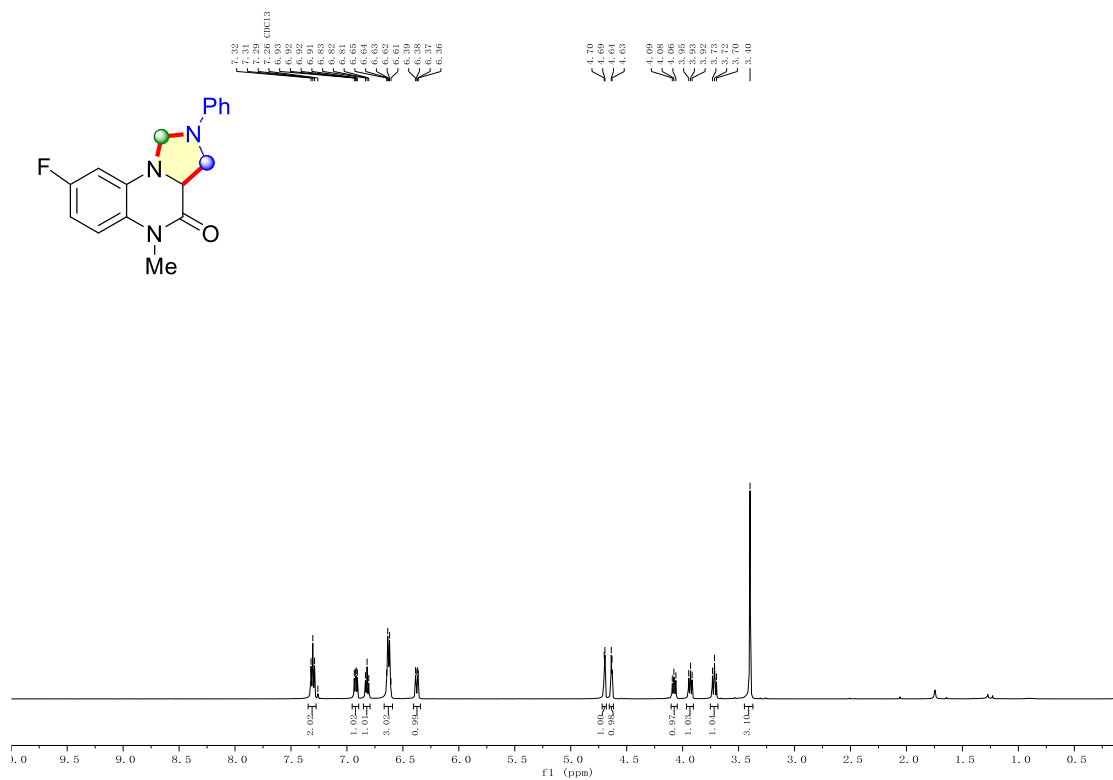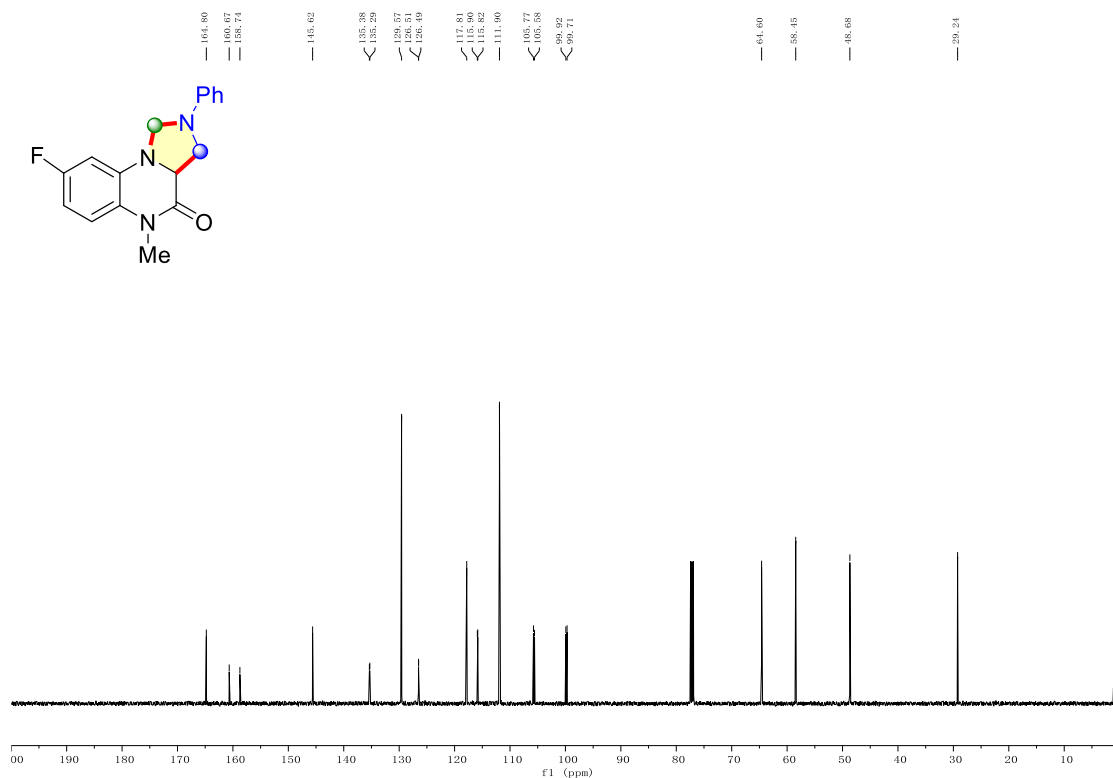



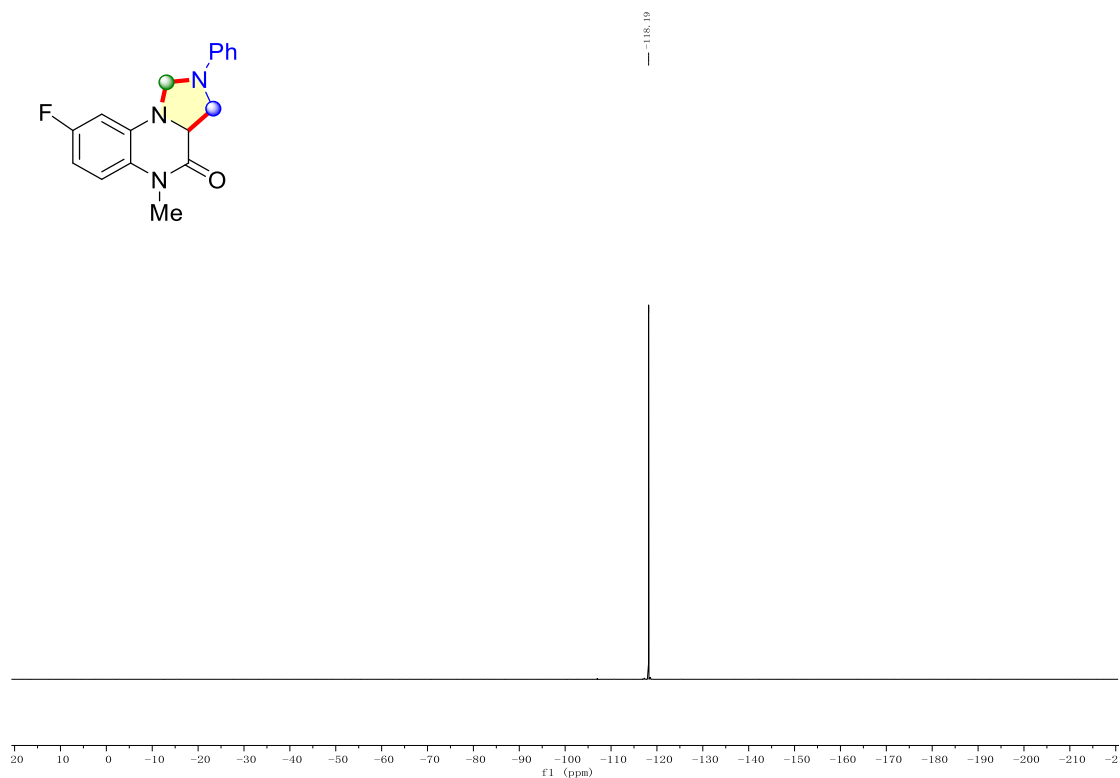

**8-chloro-5-methyl-2-phenyl-1,2,3,3a-tetrahydroimidazo[1,5-a]quinoxalin-4(5H)-one (40a)**

**40a  $^1\text{H}$  NMR (500 MHz) and  $^{13}\text{C}$  NMR (126 MHz)**

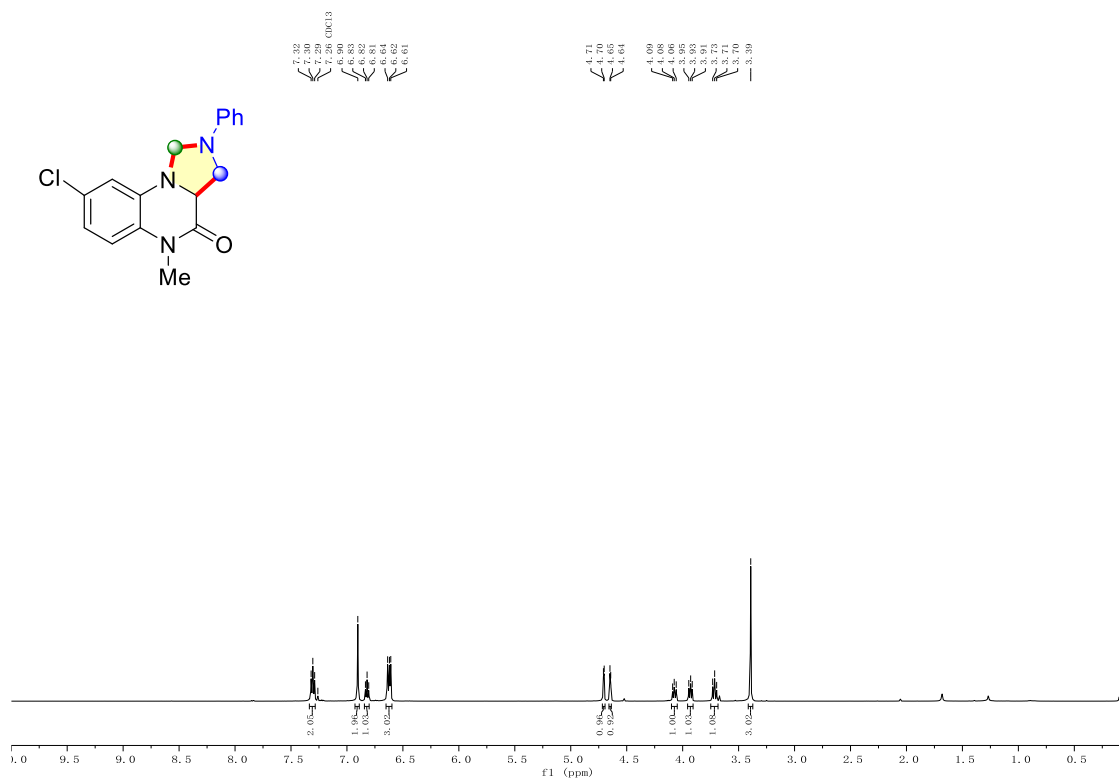

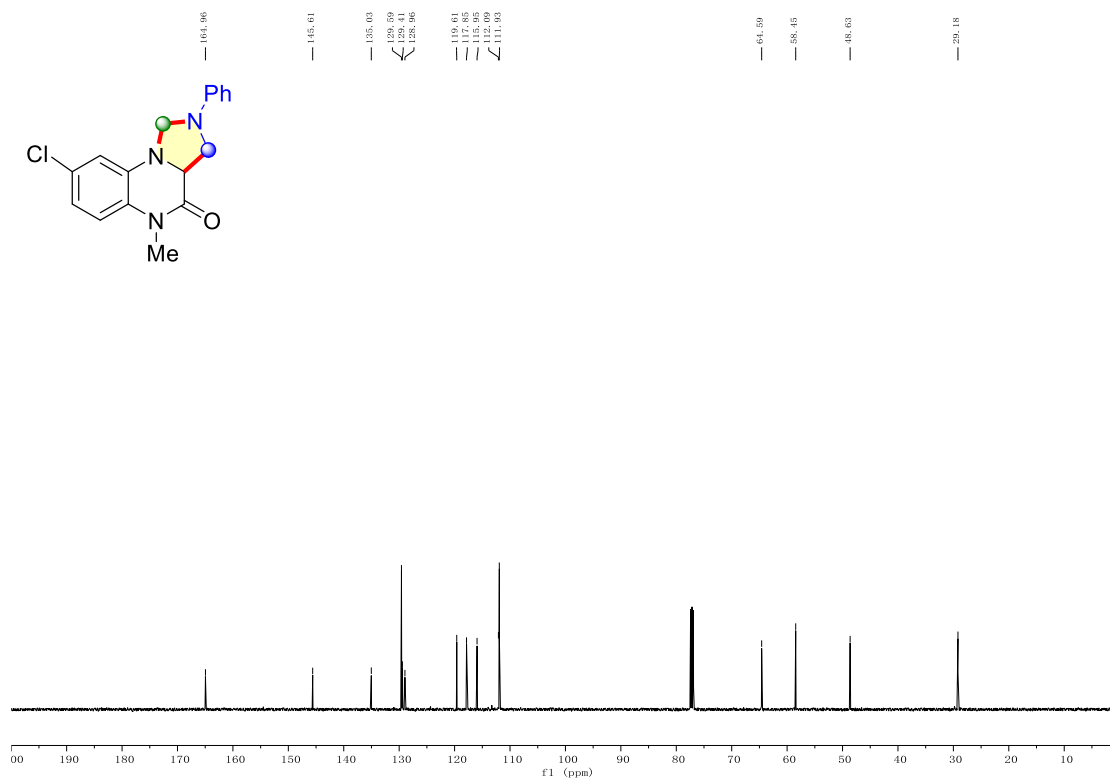

**8-bromo-5-methyl-2-phenyl-1,2,3,3a-tetrahydroimidazo[1,5-a]quinoxalin-4(5H)-one (4pa)**

**4pa <sup>1</sup>H NMR (500 MHz) and <sup>13</sup>C NMR (126 MHz)**

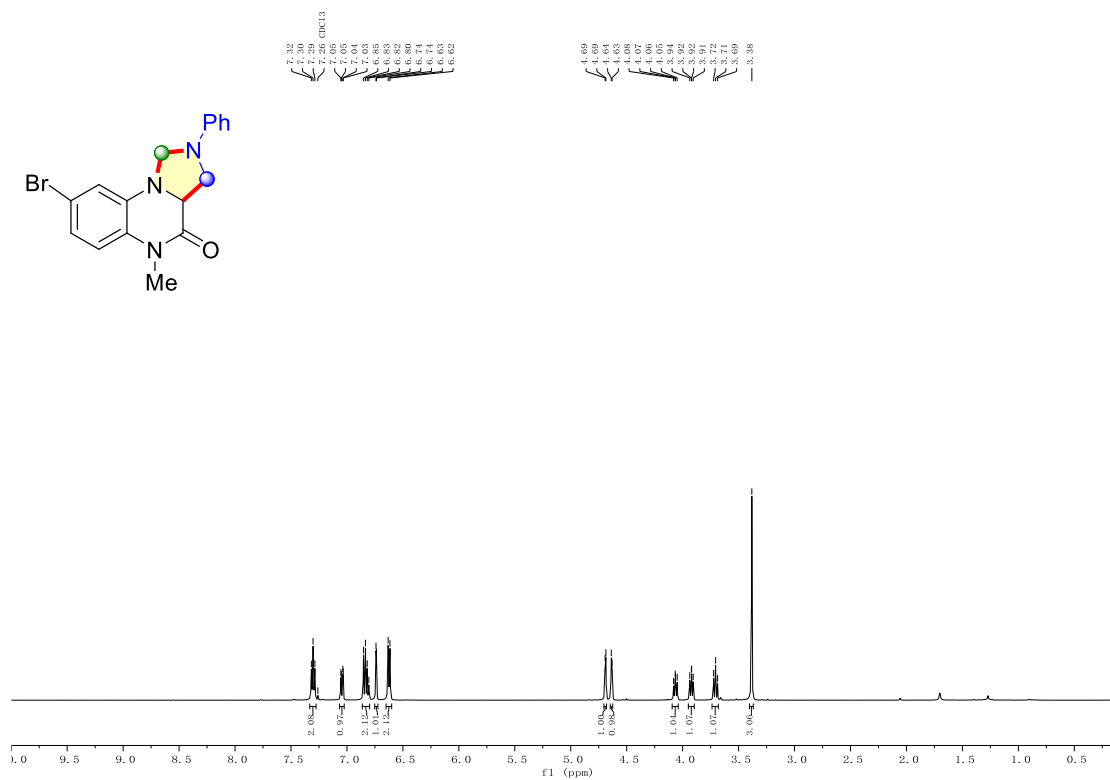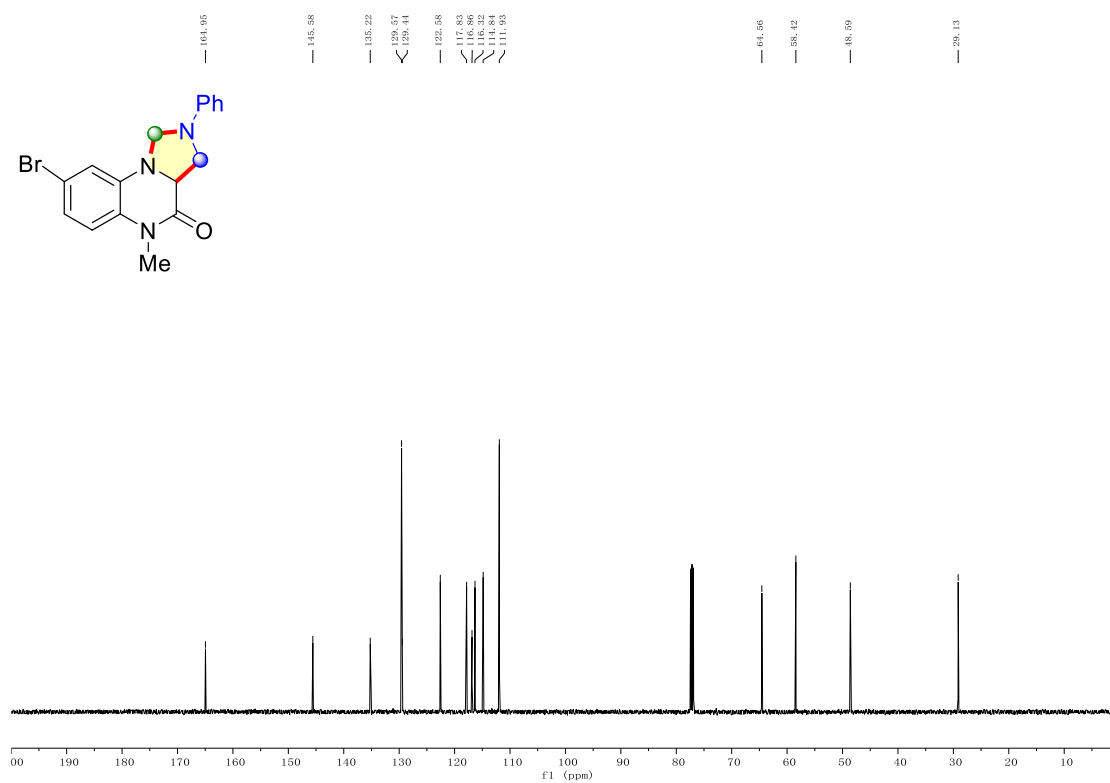

**5-methyl-2-phenyl-8-(trifluoromethyl)-1,2,3,3a-tetrahydroimidazo[1,5-a]quinoxalin-4(5H)-one (4qa)**

**4qa <sup>1</sup>H NMR (500 MHz) and <sup>13</sup>C NMR (126 MHz) and <sup>19</sup>F NMR (471 MHz)**

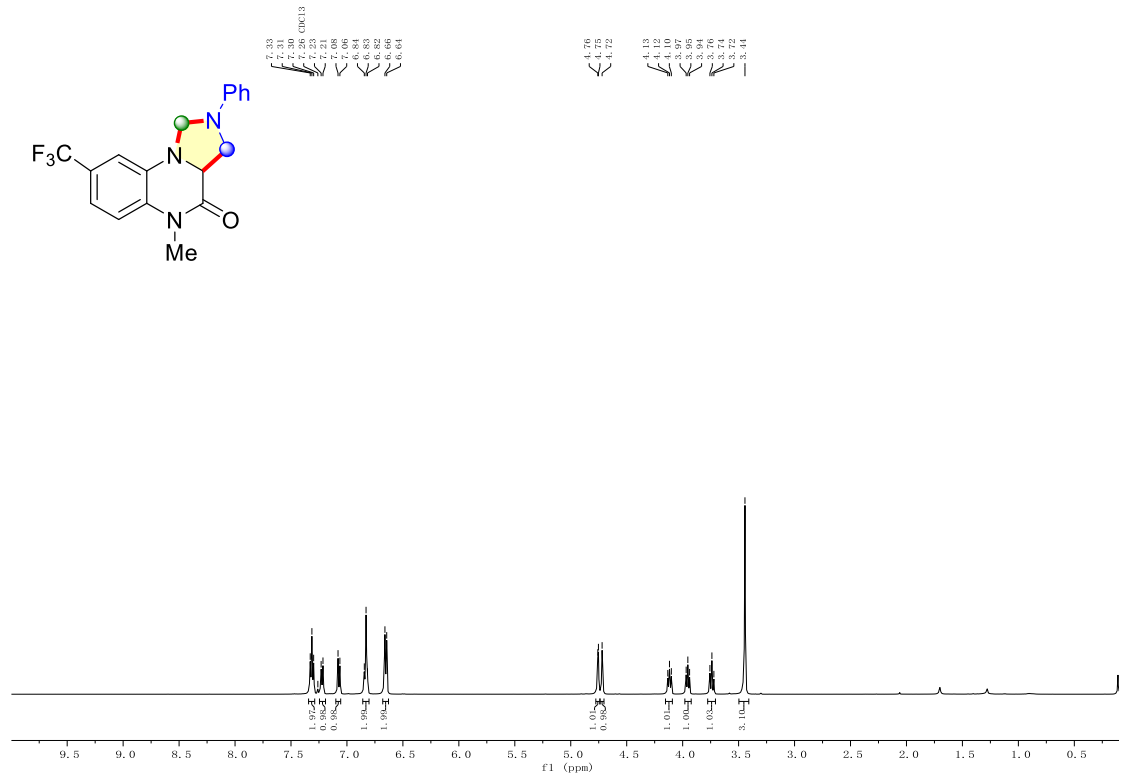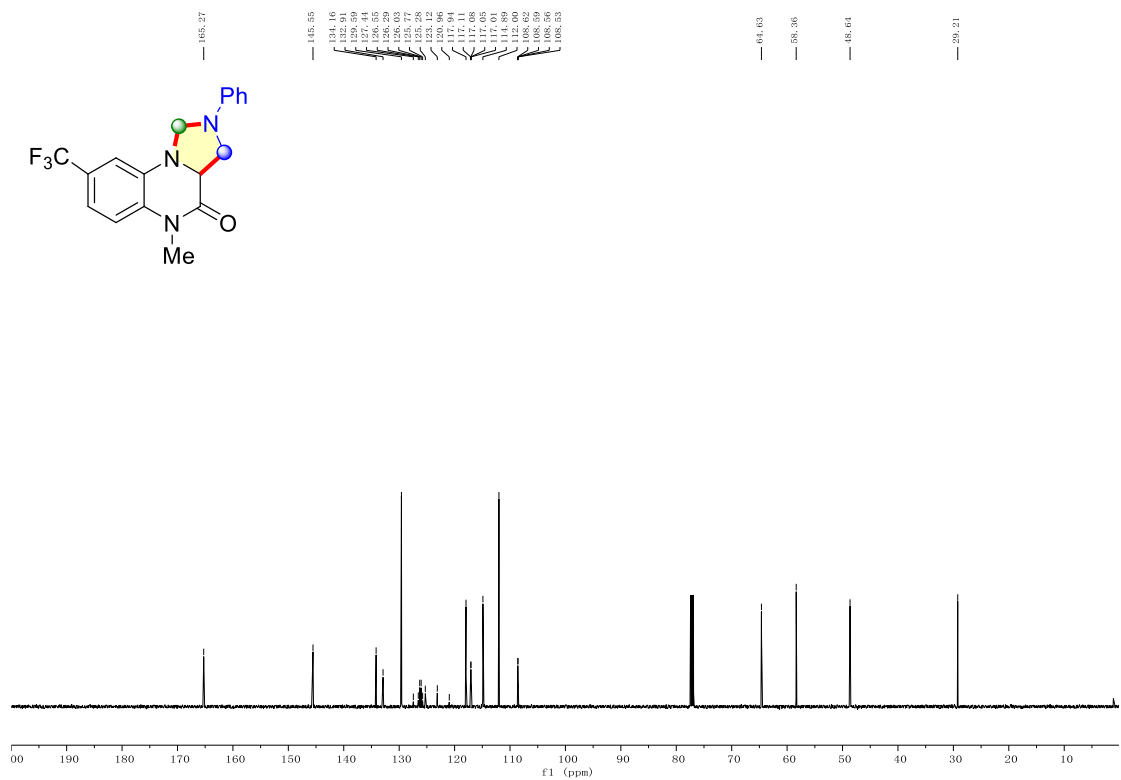

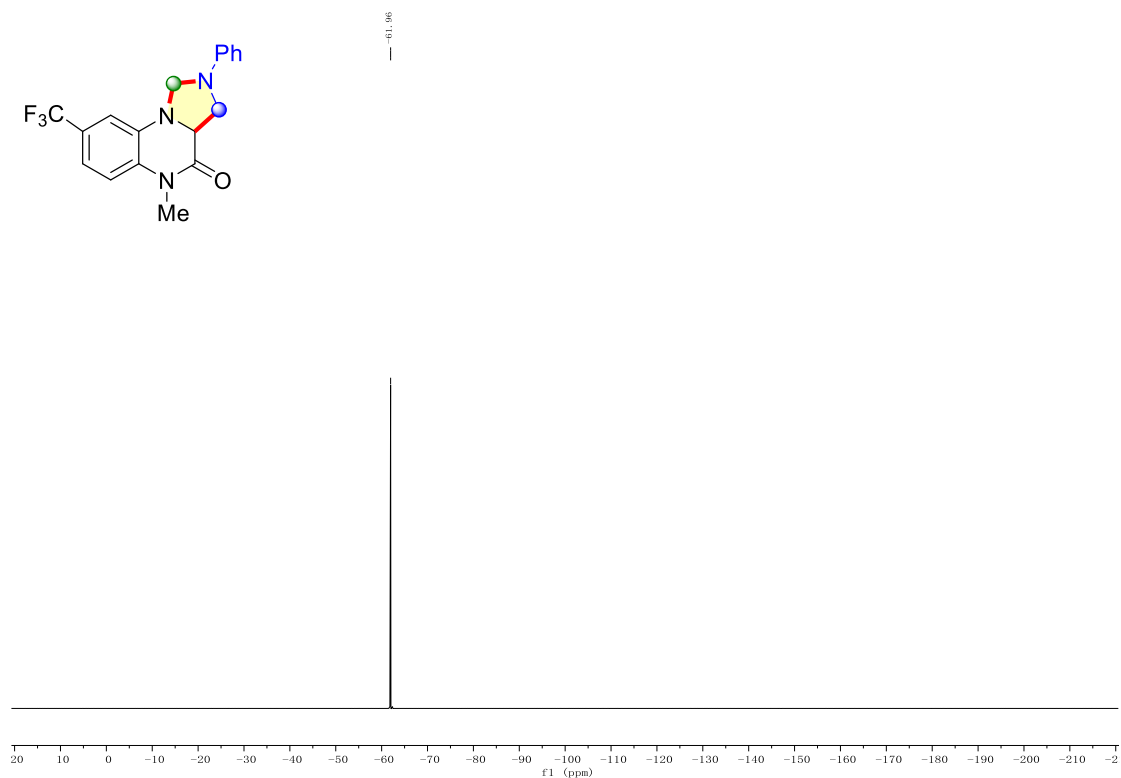

## 2-phenyl-1,2,3,3a-tetrahydroimidazo[1,5-a]quinoxalin-4(5H)-one (4ra)

### 4ra $^1\text{H}$ NMR (500 MHz) and $^{13}\text{C}$ NMR (126 MHz)

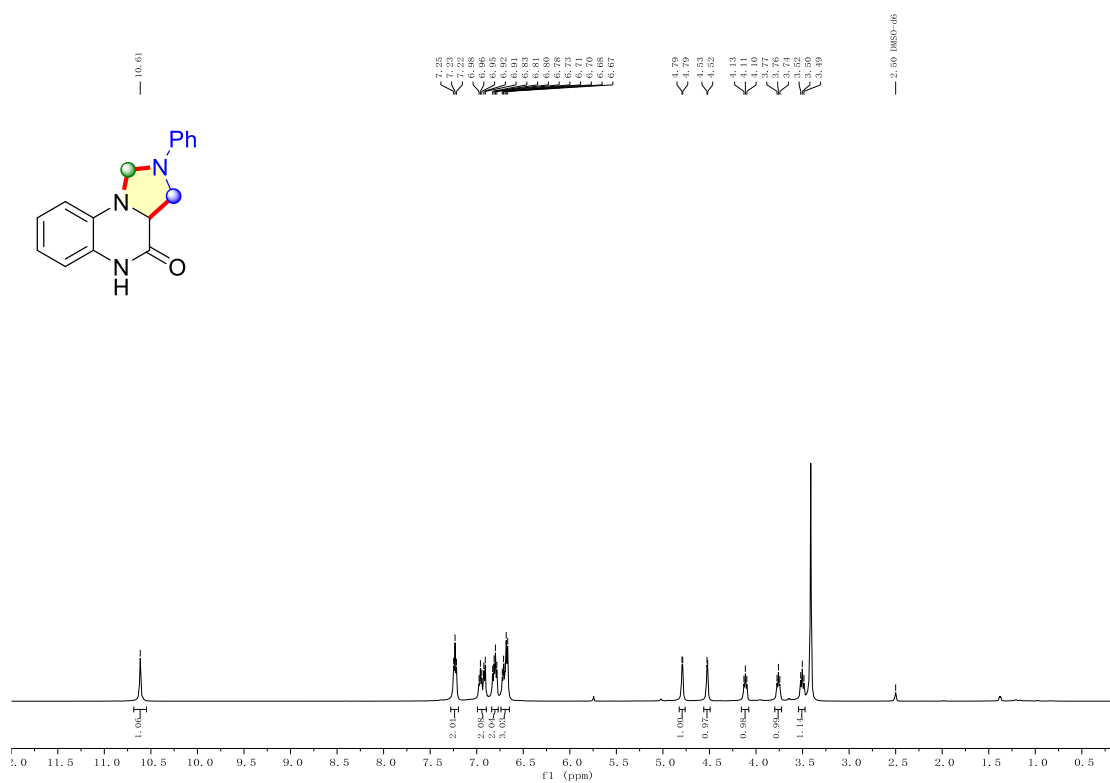

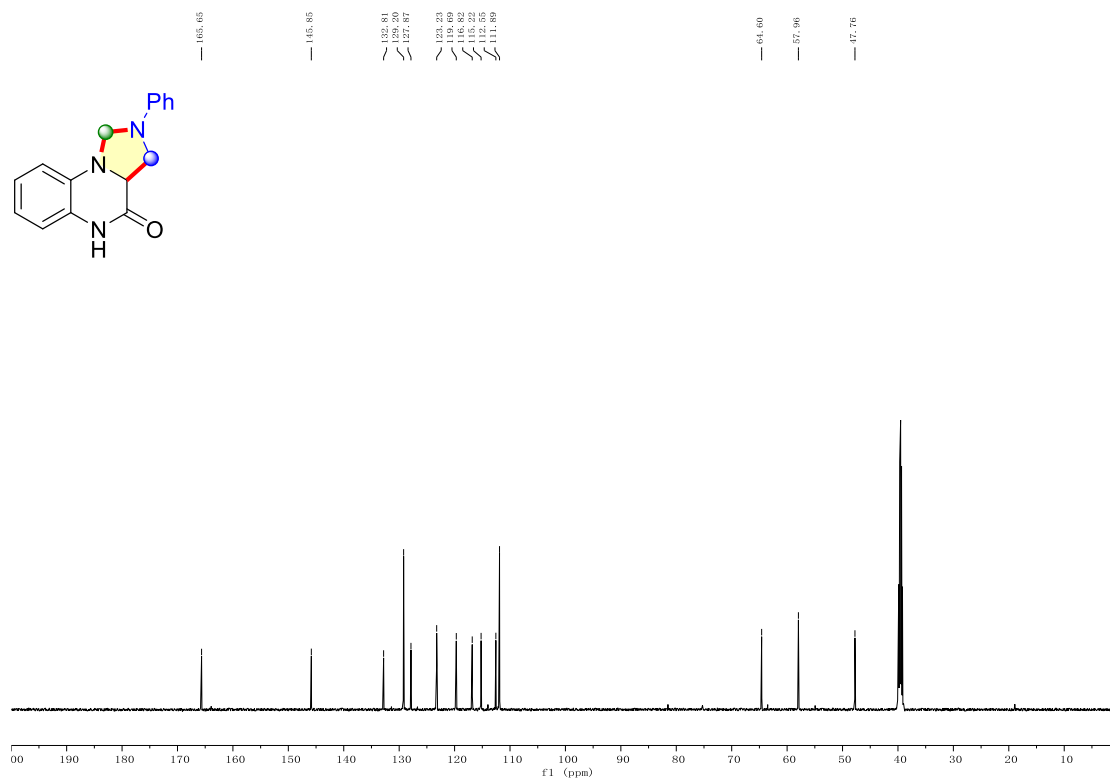

**5-methyl-2-phenyl-1,2,3,3a-tetrahydrobenzo[g]imidazo[1,5-a]quinoxalin-4(5H)-one (4sa)**

**4sa  $^1\text{H}$ NMR (500 MHz) and  $^{13}\text{C}$  NMR (126 MHz)**

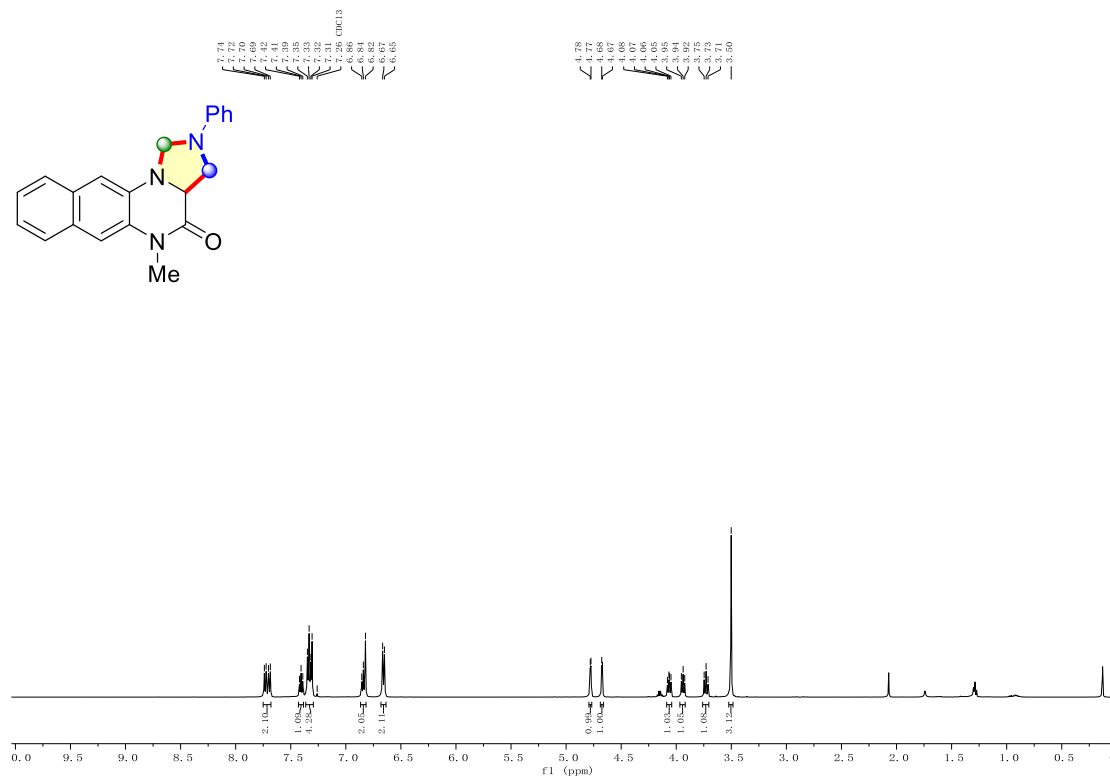



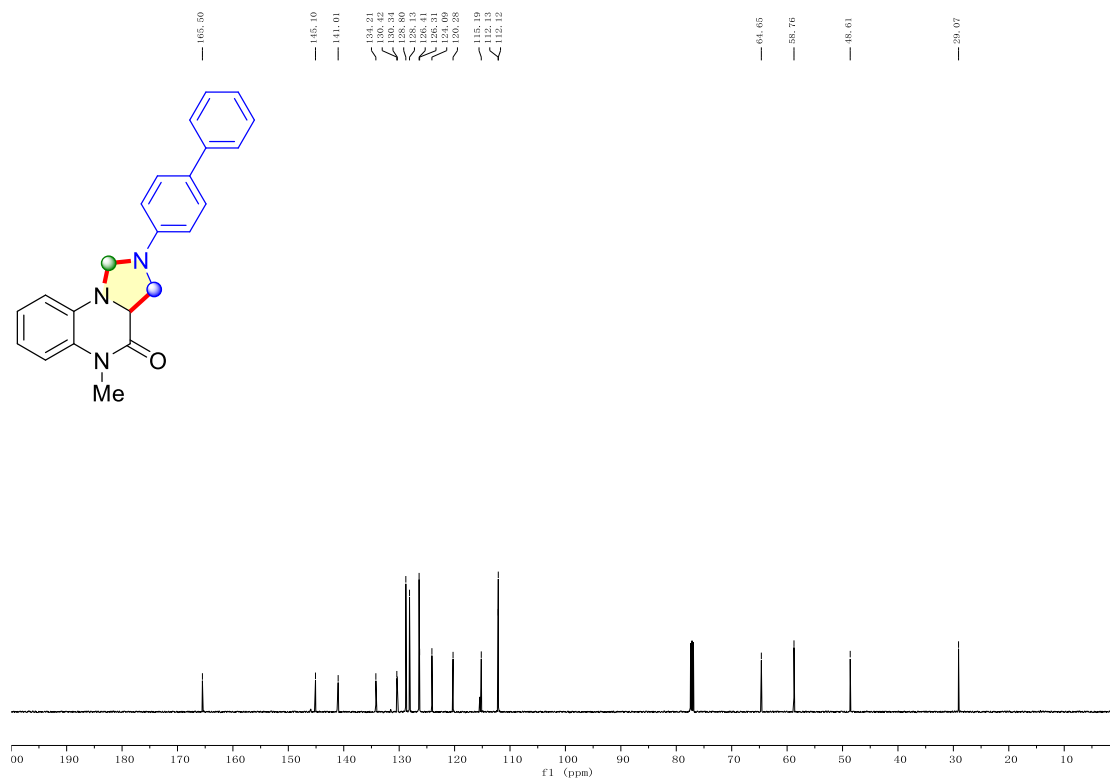

**5-methyl-2-(p-tolyl)-1,2,3,3a-tetrahydroimidazo[1,5-a]quinoxalin-4(5H)-one (4ac)**

**4ac <sup>1</sup>H NMR (500 MHz) and <sup>13</sup>C NMR (126 MHz)**

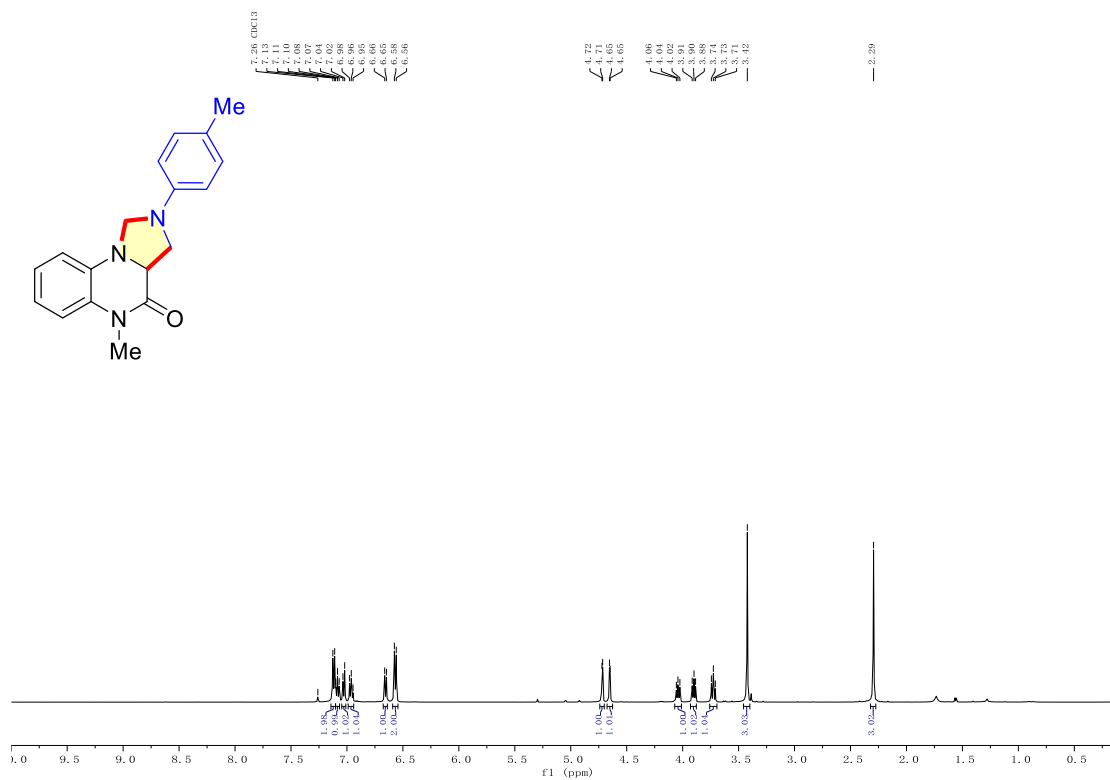





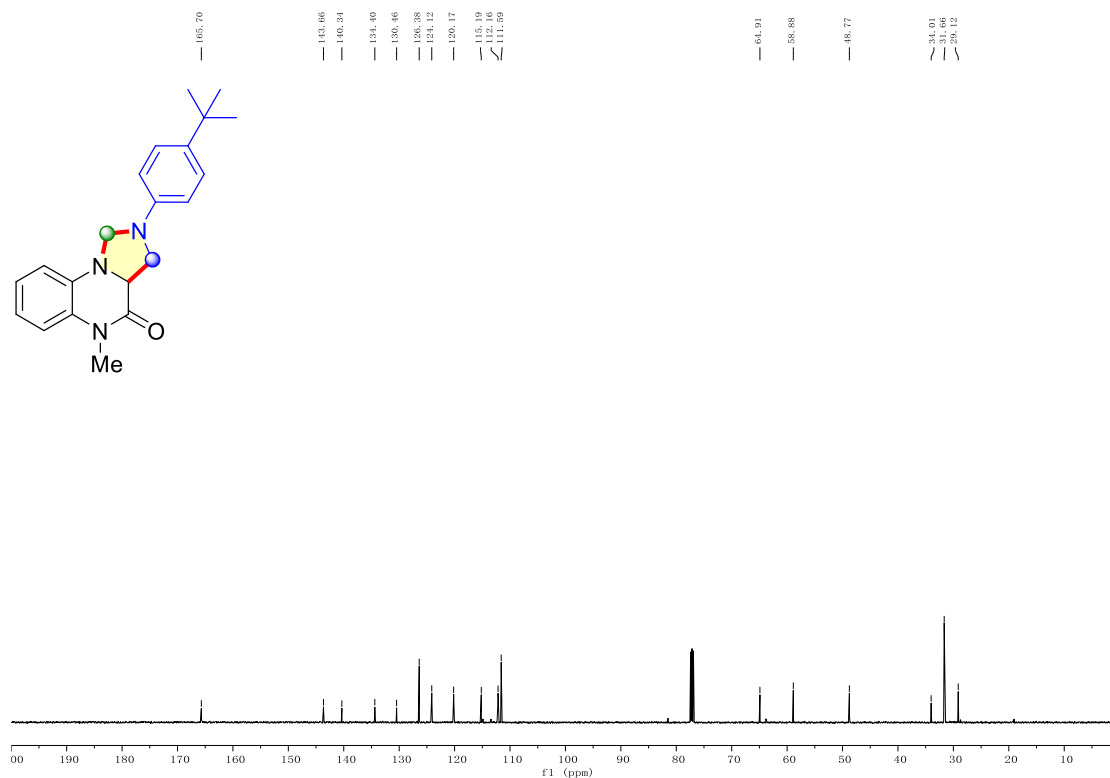

**2-(4-methoxyphenyl)-5-methyl-1,2,3,3a-tetrahydroimidazo[1,5-a]quinoxalin-4(5H)-one (4ae)**

**4ae  $^1\text{H}$  NMR (500 MHz) and  $^{13}\text{C}$  NMR (126 MHz)**

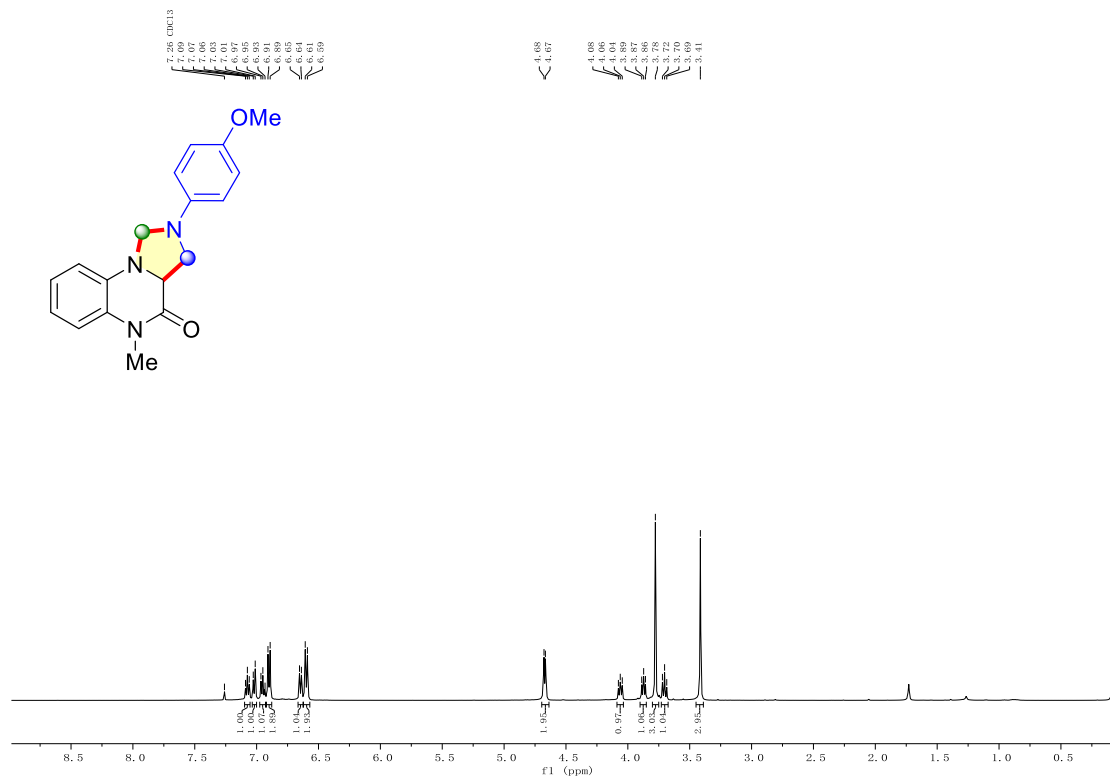

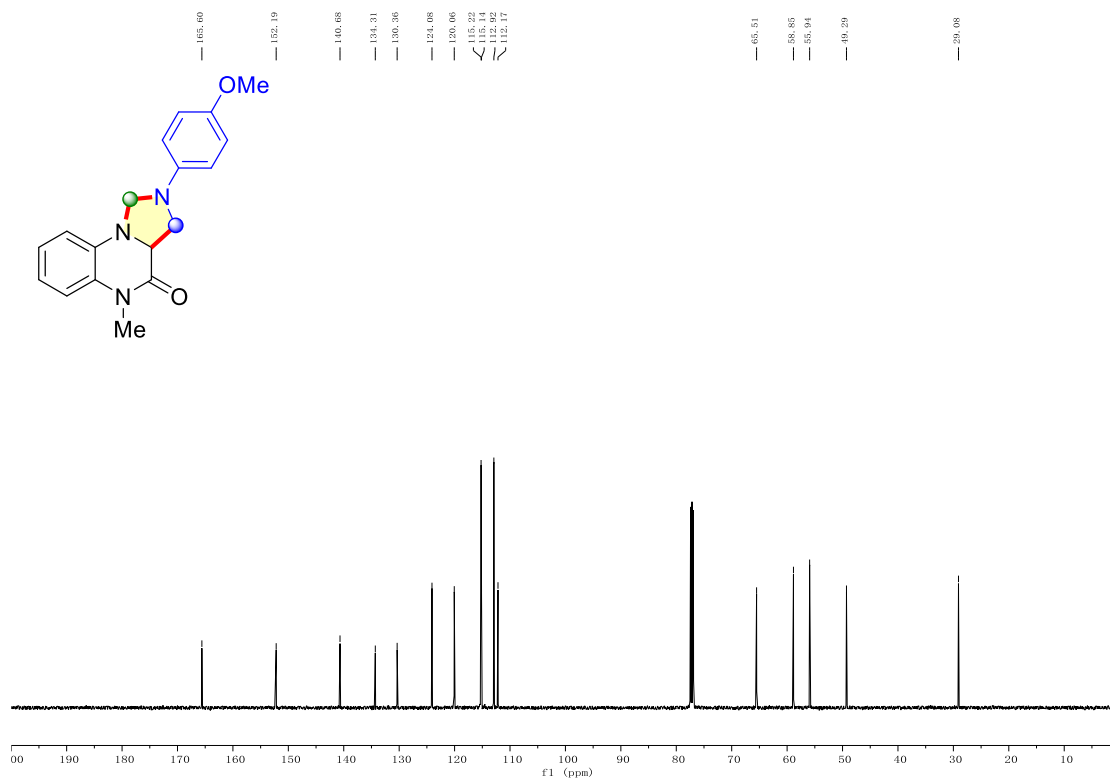

**5-methyl-2-(4-(trifluoromethoxy)phenyl)-1,2,3,3a-tetrahydroimidazo[1,5-a]quinoxalin-4(5H)-one (4af)**

**4af <sup>1</sup>H NMR (500 MHz) and <sup>13</sup>C NMR (126 MHz) and <sup>19</sup>F NMR (471 MHz)**

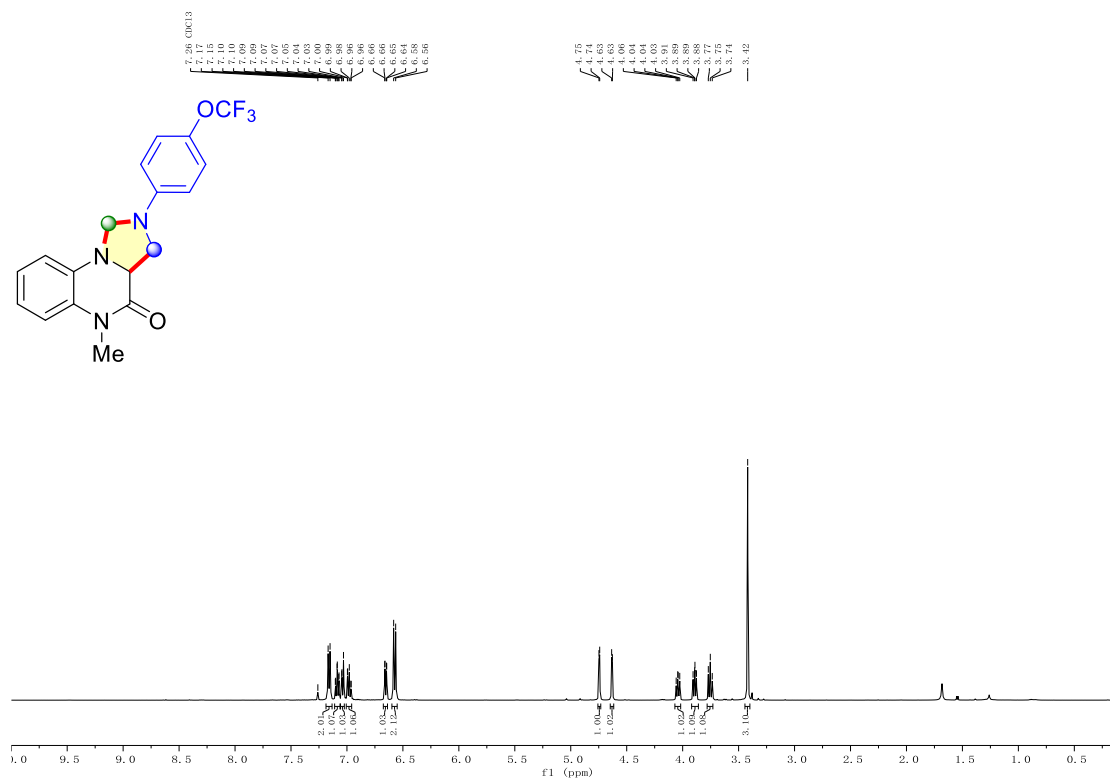

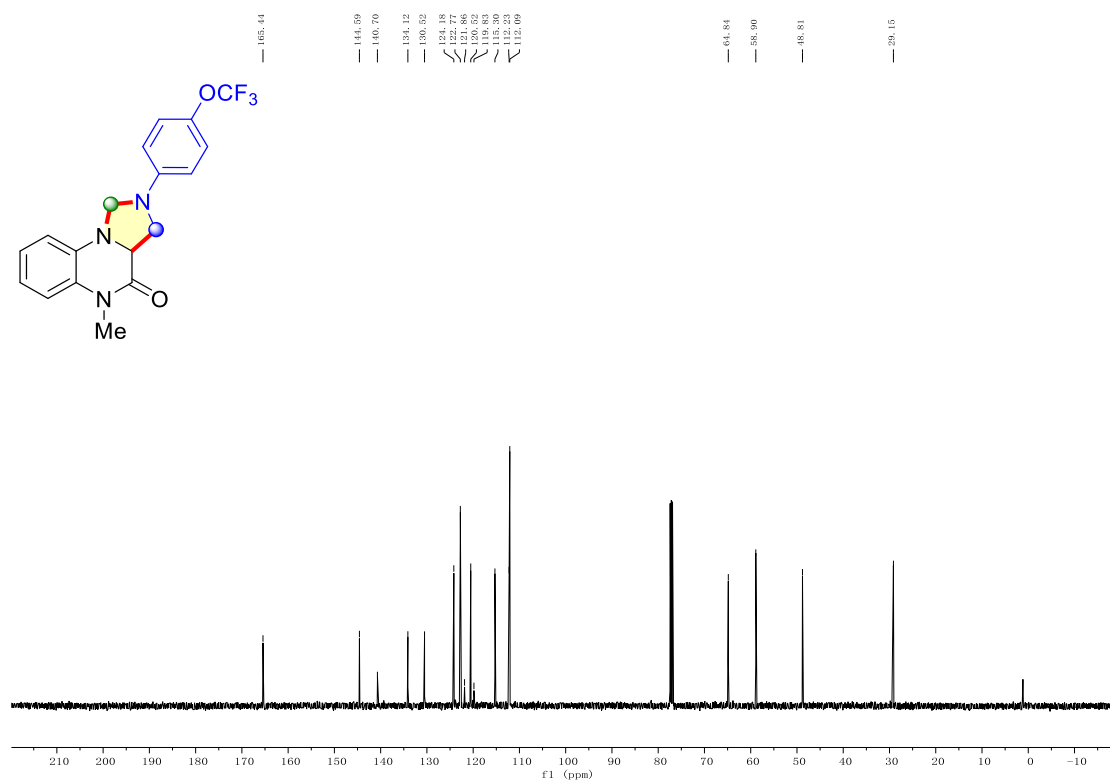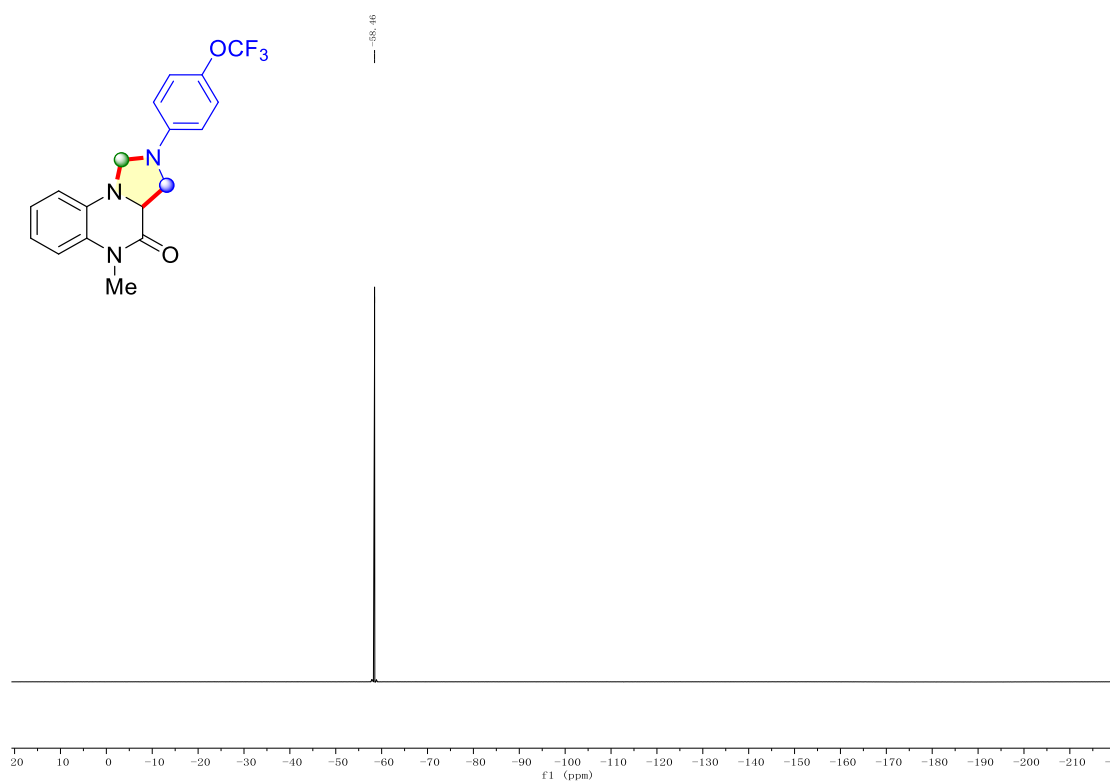

**5-methyl-2-(4-(methylthio)phenyl)-1,2,3,3a-tetrahydroimidazo[1,5-a]quinoxalin-4(5H)-one (4ag)**  
**4ag <sup>1</sup>H NMR (500 MHz) and <sup>13</sup>C NMR (126 MHz)**

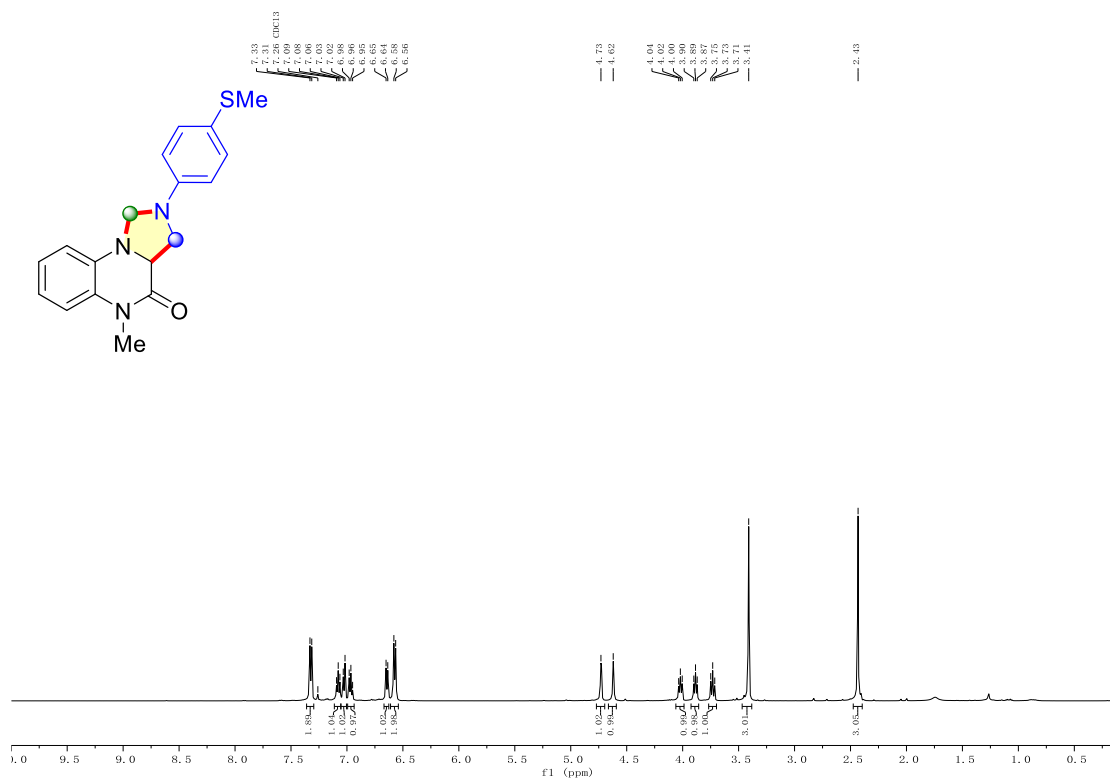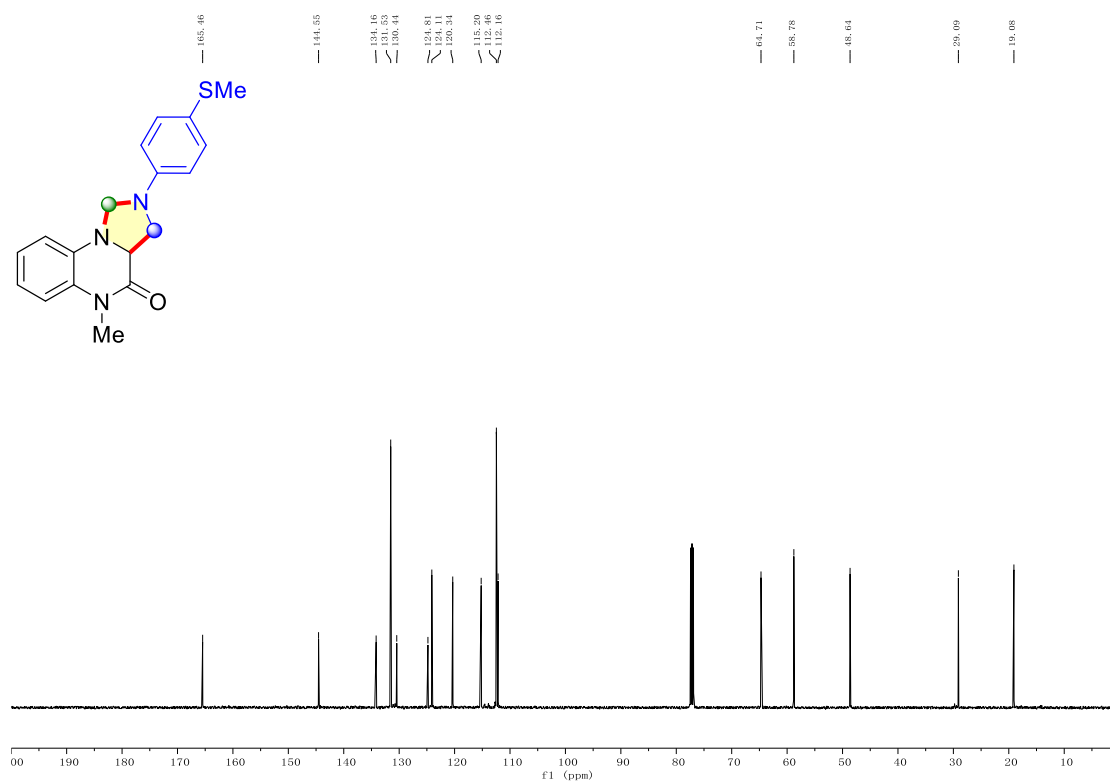

**2-(4-fluorophenyl)-5-methyl-1,2,3,3a-tetrahydroimidazo[1,5-a]quinoxalin-4(5H)-one (4ah)**

**4ah <sup>1</sup>H NMR (500 MHz) and <sup>13</sup>C NMR (126 MHz) and <sup>19</sup>F NMR (471 MHz)**



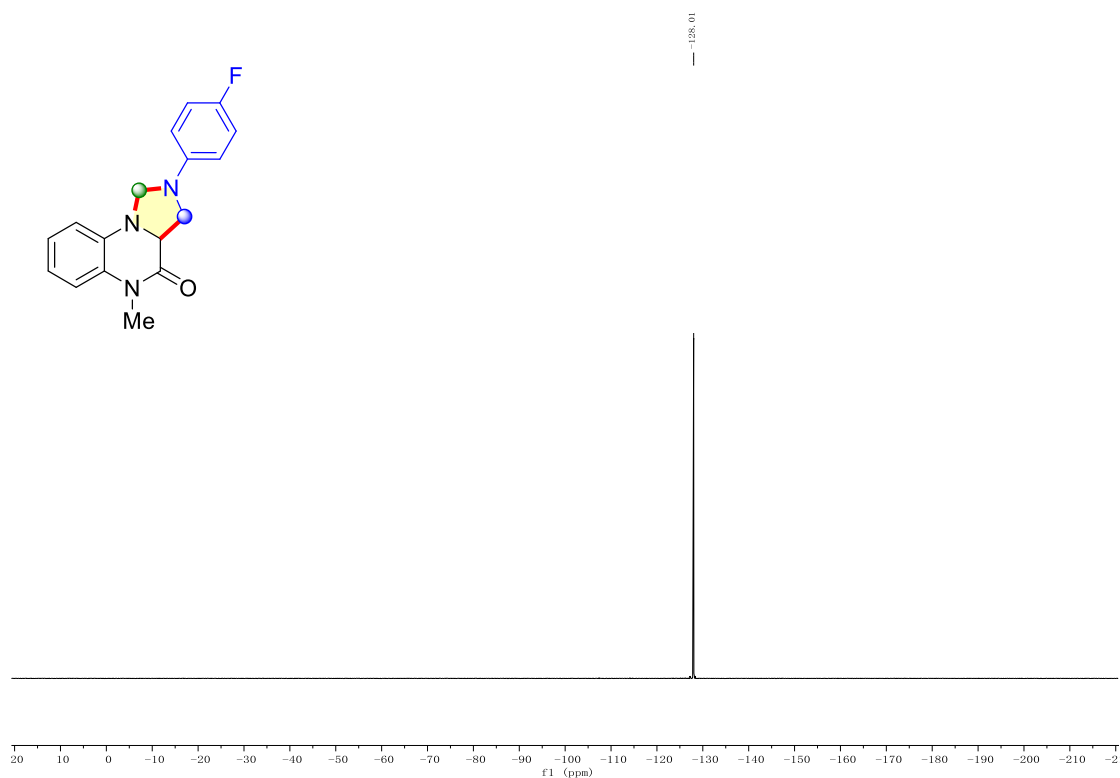

**2-(4-chlorophenyl)-5-methyl-1,2,3,3a-tetrahydroimidazo[1,5-a]quinoxalin-4(5H)-one (4ai)**

**4ai  $^1\text{H}$  NMR (500 MHz) and  $^{13}\text{C}$  NMR (126 MHz)**

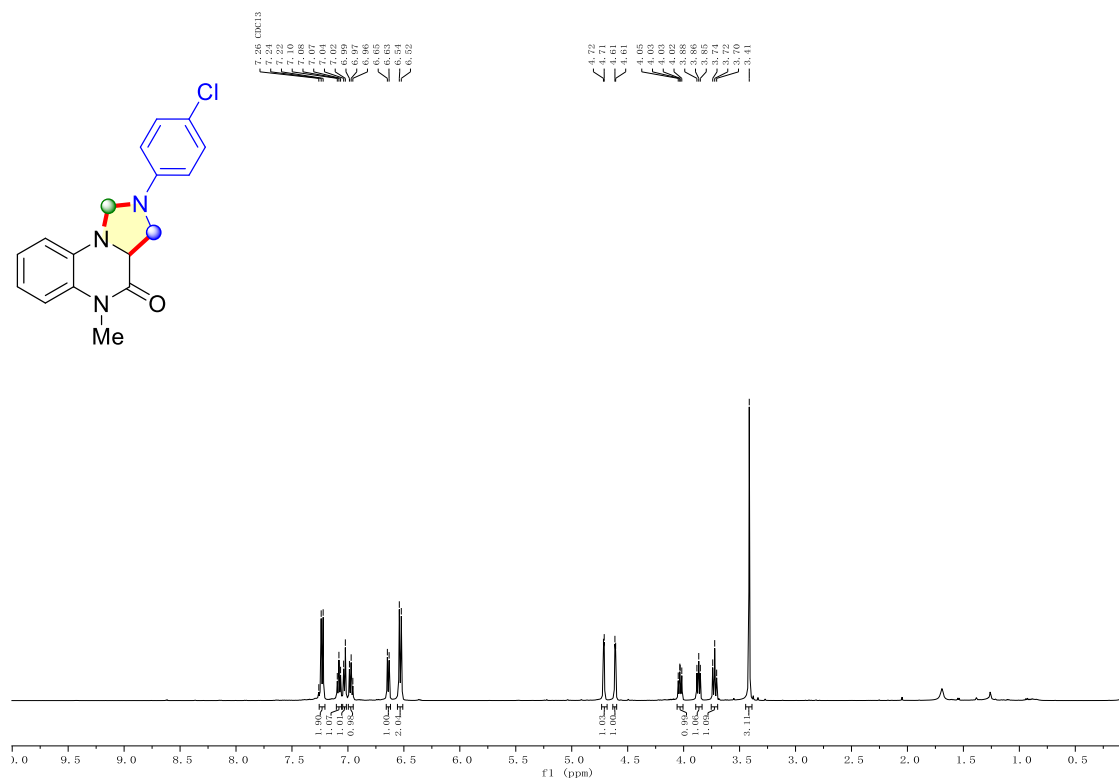

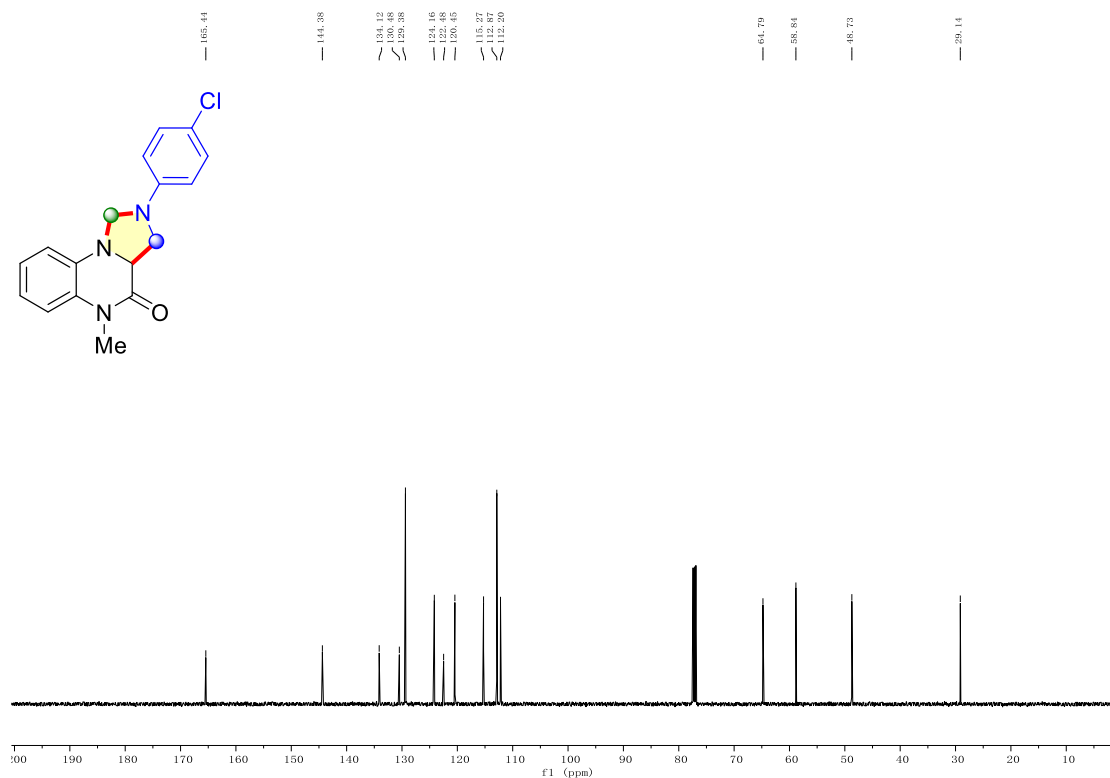

**2-(4-bromophenyl)-5-methyl-1,2,3,3a-tetrahydroimidazo[1,5-a]quinoxalin-4(5H)-one (4aj)**

**4aj <sup>1</sup>H NMR (500 MHz) and <sup>13</sup>C NMR (126 MHz)**

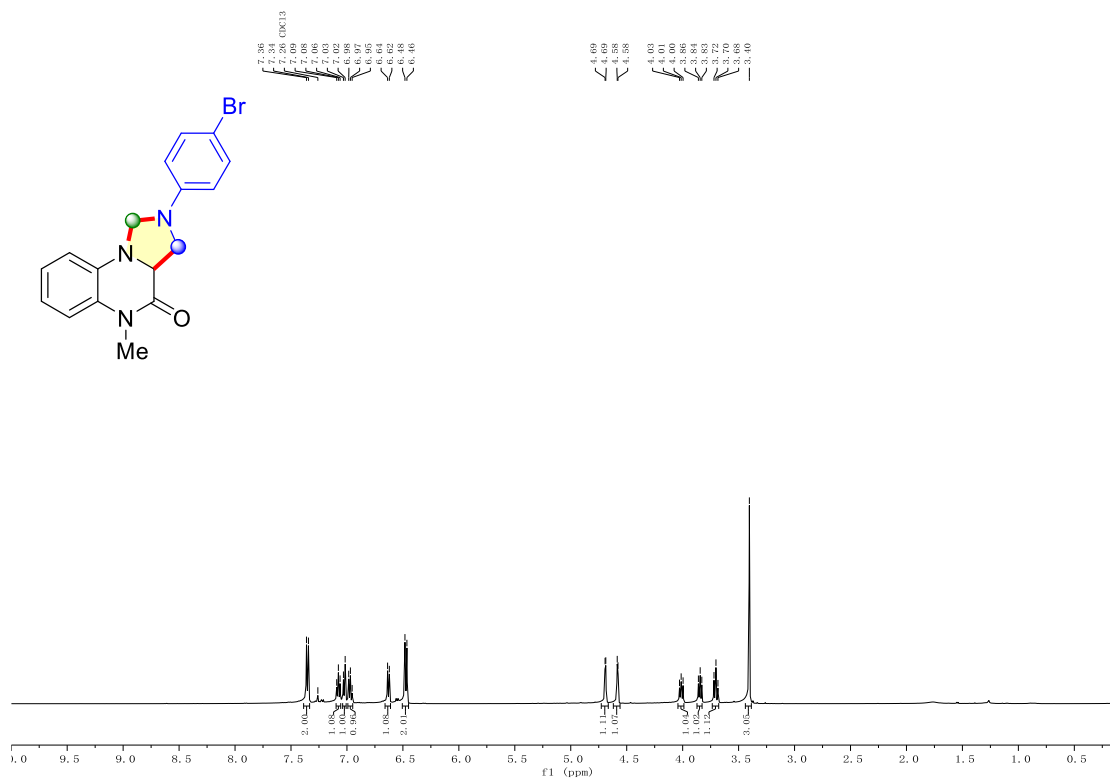



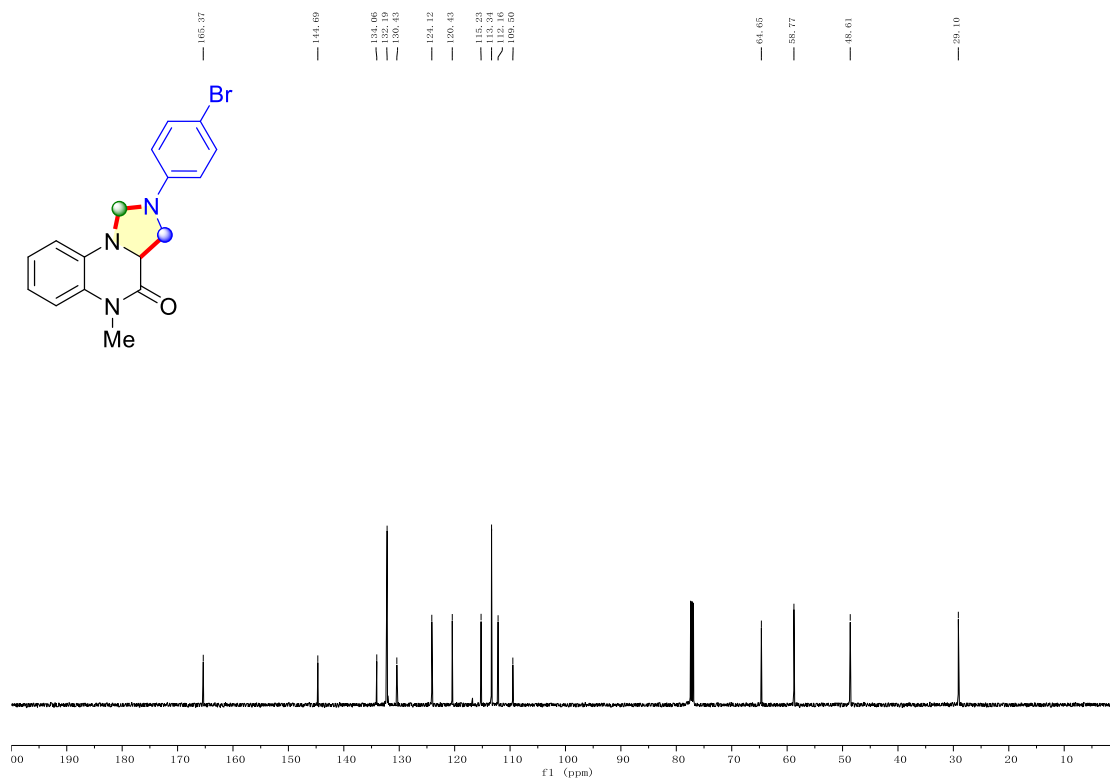

**5-methyl-2-(4-(trifluoromethyl)phenyl)-1,2,3,3a-tetrahydroimidazo[1,5-a]quinoxalin-4(5H)-one (4ak)**

**4ak  $^1\text{H}$  NMR (500 MHz) and  $^{13}\text{C}$  NMR (126 MHz) and  $^{19}\text{F}$  NMR (471 MHz)**

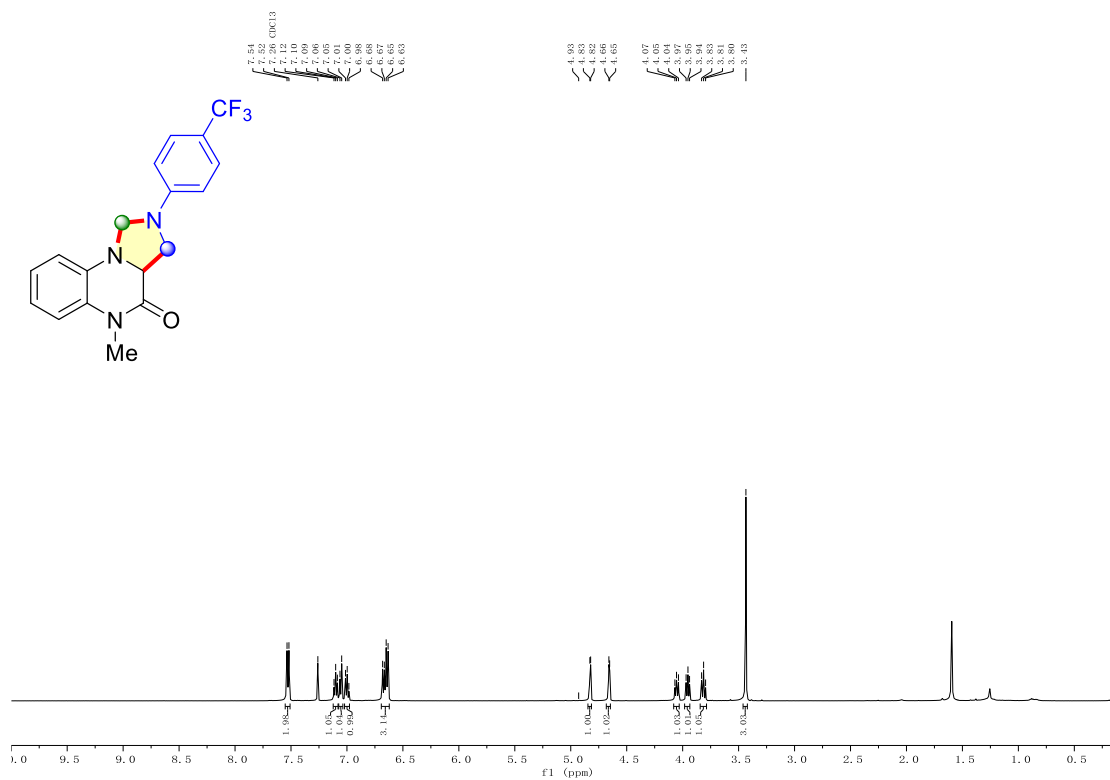

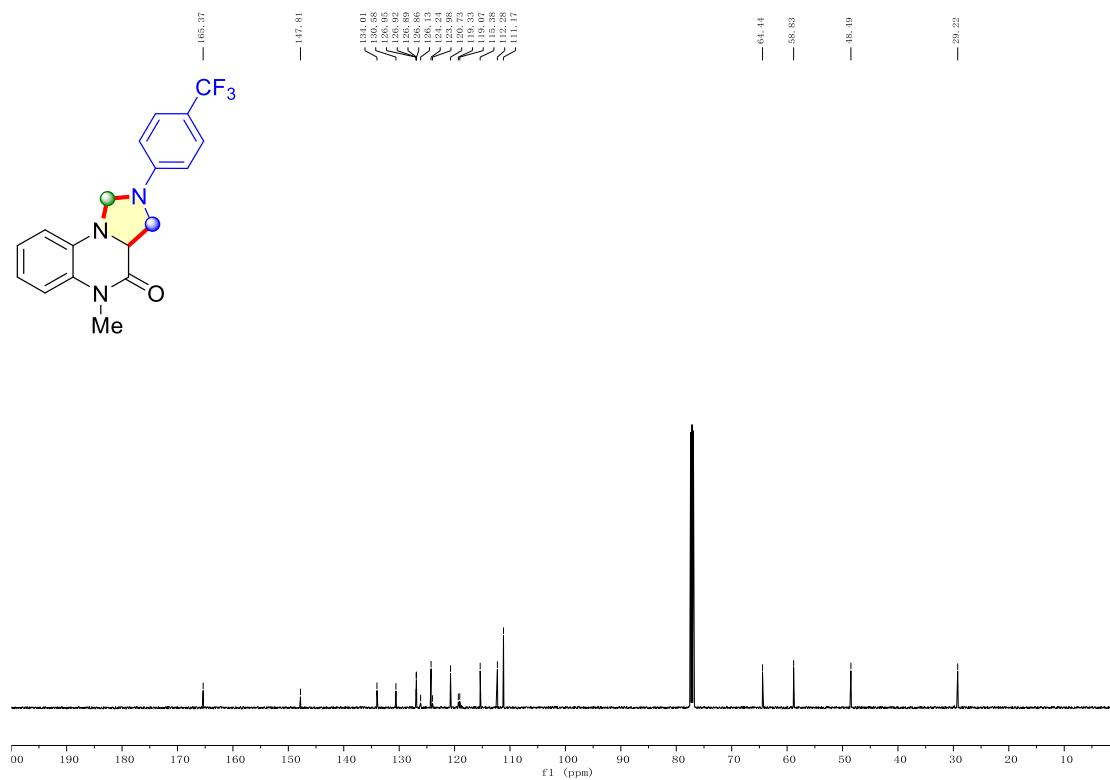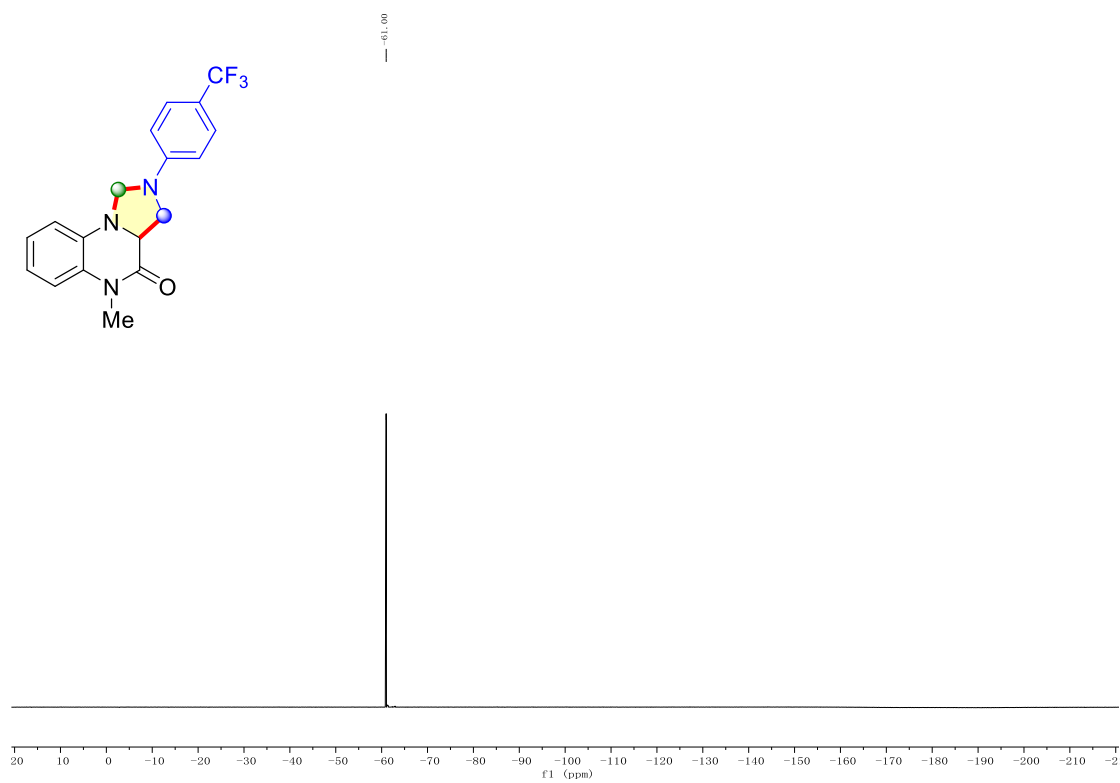

**5-methyl-2-(m-tolyl)-1,2,3,3a-tetrahydroimidazo[1,5-a]quinoxalin-4(5H)-one (4a)**

**4al <sup>1</sup>H NMR (500 MHz) and <sup>13</sup>C NMR (126 MHz)**

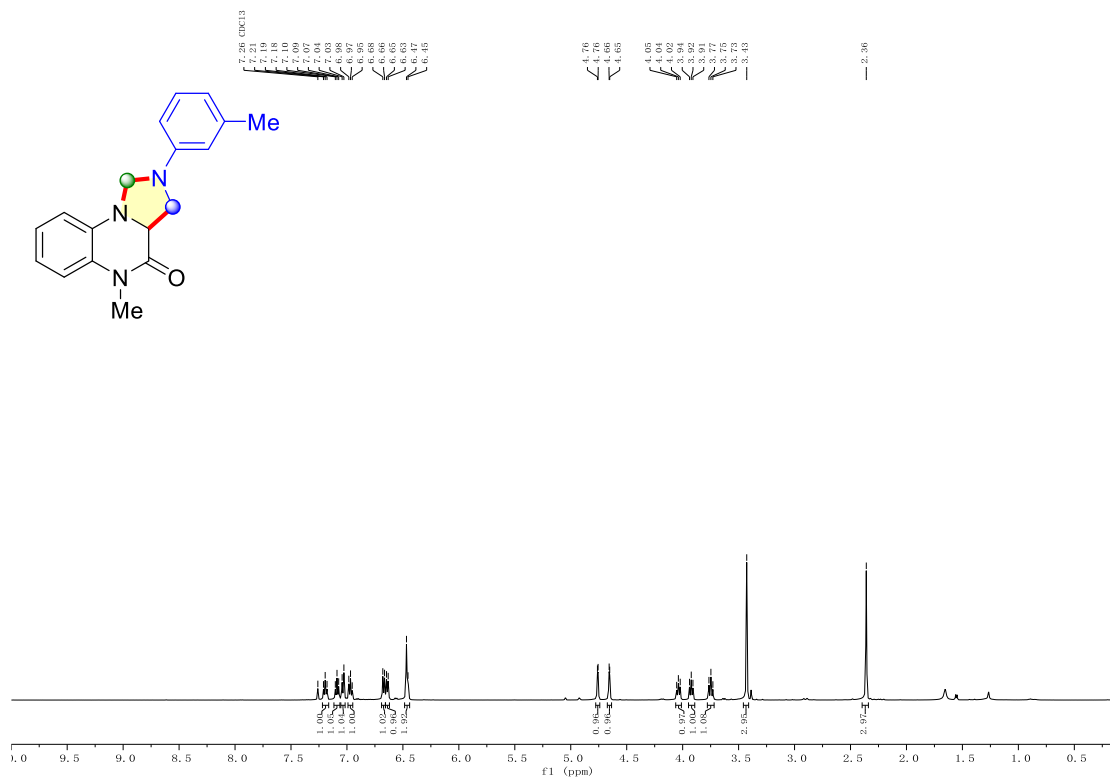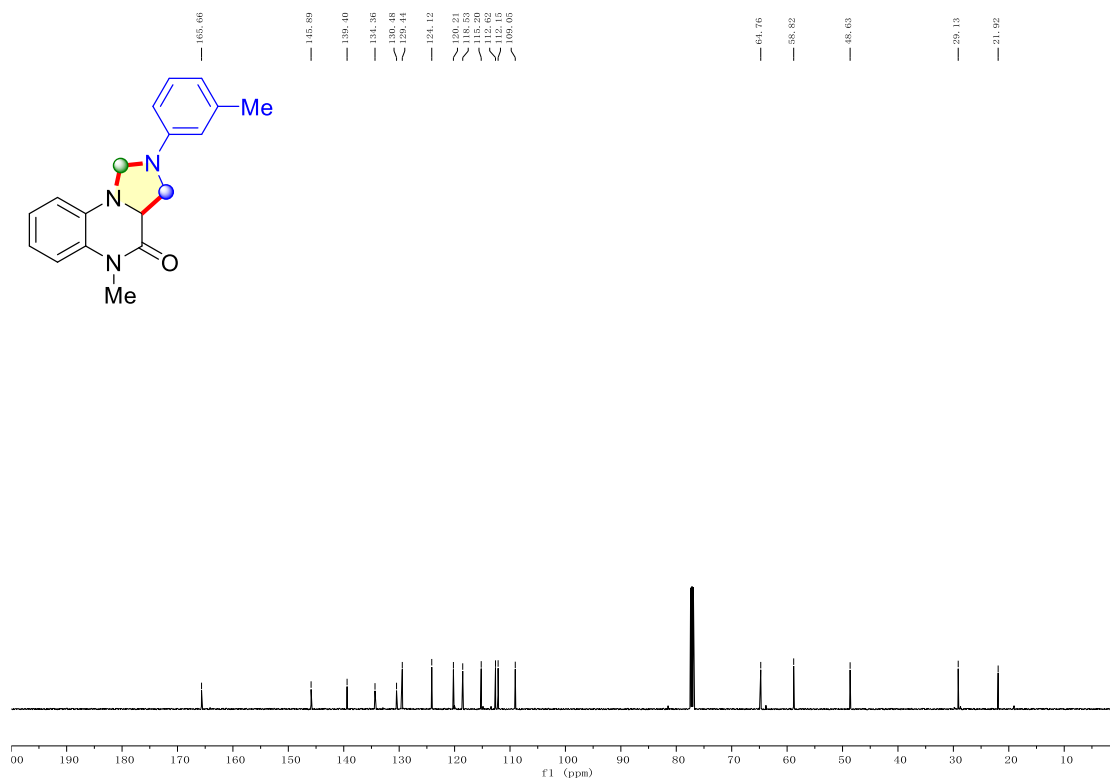

**5-methyl-2-(o-tolyl)-1,2,3,3a-tetrahydroimidazo[1,5-a]quinoxalin-4(5H)-one**  
**(4am)**

**4am <sup>1</sup>H NMR (500 MHz) and <sup>13</sup>C NMR (126 MHz)**

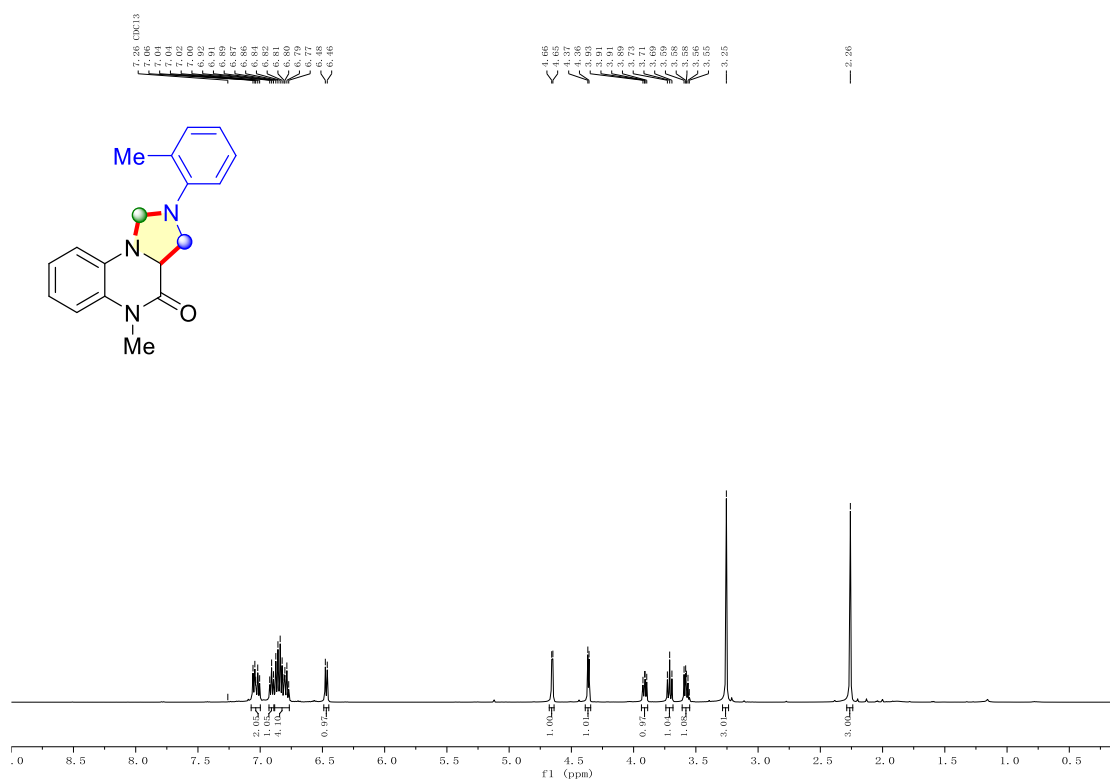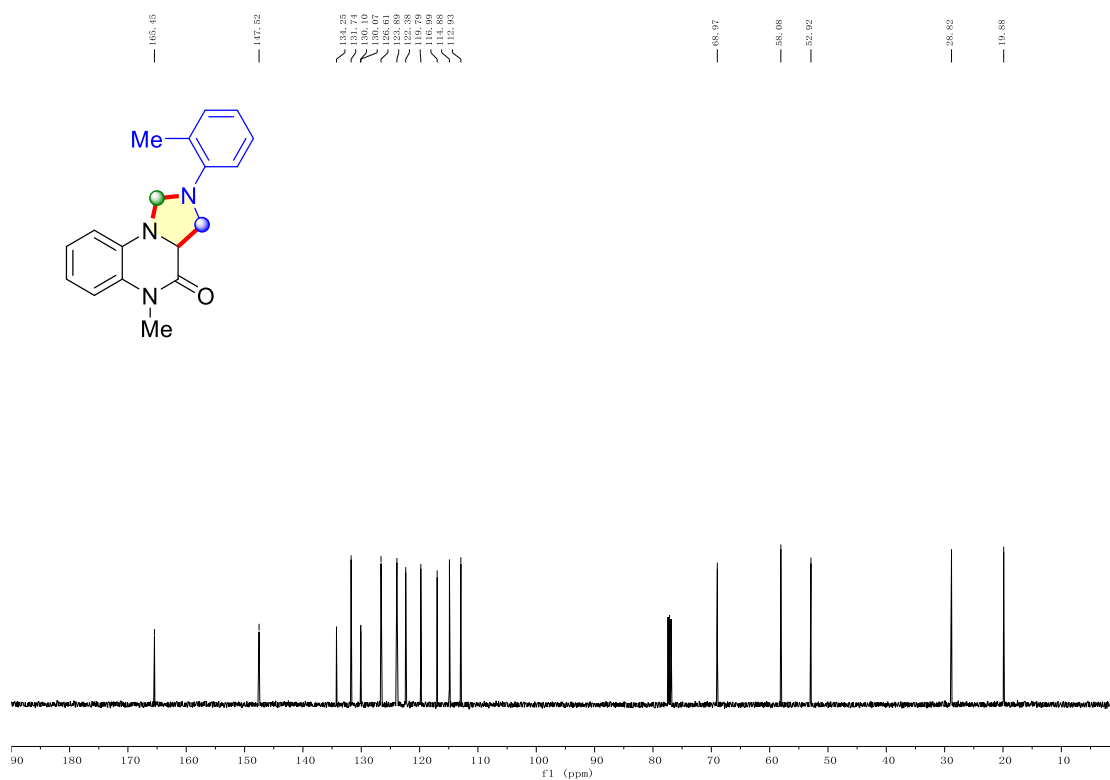

Supplement: d3cc04020h1.pdf [file d3cc04020h1.pdf]
